# Supplementary material
Source: Royal Society of Chemistry journal article supplement (doi:10.1039/d6ob00317f)
Supplement: d6ob00317f1.pdf [file d6ob00317f1.pdf]

## SUPPLEMENTARY INFORMATION

### Utility of $\alpha$ -halodicyclopentadienones for the synthesis of novel fused heterocycles

Sohan Lal,<sup>a</sup> Gangavara L. Tejashree,<sup>a</sup> Dipankar Das,<sup>b</sup> Bishwajit Ganguly,<sup>b\*</sup> Arindrajit Chowdhury,<sup>c</sup>  
and Irishi N. N. Namboothiri<sup>a\*</sup>

*Department of Chemistry<sup>a</sup> and Department of Mechanical Engineering,<sup>c</sup> Indian Institute of Technology  
Bombay, Mumbai 400 076, India, irishi@iitb.ac.in*

*<sup>b</sup>Computation and Simulation Unit, CSIR-Central Salt & Marine Chemicals Research Institute, Bhavnagar,  
Gujarat 364002, India, gangulycsmcri@gmail.com*

### List of Figures

| Contents                                                           | Page |
|--------------------------------------------------------------------|------|
| Figure S1. <sup>1</sup> H NMR of compound 3a                       | 4    |
| Figure S2. <sup>13</sup> C NMR of compound 3a                      | 5    |
| Figure S3. <sup>1</sup> H NMR of compound 3b                       | 6    |
| Figure S4. <sup>13</sup> C NMR of compound 3b                      | 7    |
| Figure S5. <sup>1</sup> H NMR of compound 3c                       | 8    |
| Figure S6. <sup>13</sup> C NMR of compound 3c                      | 09   |
| Figure S7. <sup>13</sup> C-APT NMR of compound 3c                  | 10   |
| Figure S8. <sup>1</sup> H NMR of compound 3f                       | 11   |
| Figure S9. <sup>13</sup> C NMR of compound 3f                      | 12   |
| Figure S10. <sup>13</sup> C-APT NMR of compound 3f                 | 13   |
| Figure S11. <sup>1</sup> H- <sup>1</sup> H COSY NMR of compound 3f | 14   |
| Figure S12. <sup>1</sup> H NMR of compound 3g                      | 15   |
| Figure S13. <sup>13</sup> C NMR of compound 3g                     | 16   |
| Figure S14. <sup>13</sup> C-APT NMR of compound 3g                 | 17   |
| Figure S15. <sup>1</sup> H NMR of compound 3h                      | 18   |
| Figure S16. <sup>13</sup> C NMR of compound 3h                     | 19   |
| Figure S17. <sup>13</sup> C-APT NMR of compound 3h                 | 20   |
| Figure S18. <sup>1</sup> H- <sup>1</sup> H COSY NMR of compound 3h | 21   |
| Figure S19. <sup>1</sup> H- <sup>13</sup> C HSQC of compound 3h    | 22   |
| Figure S20. <sup>1</sup> H NMR of compound 4                       | 23   |
| Figure S21. <sup>13</sup> C NMR of compound 4                      | 24   |
| Figure S22. <sup>13</sup> C-APT NMR of compound 4                  | 25   |
| Figure S23. <sup>1</sup> H NMR of compound 6a                      | 26   |
| Figure S24. <sup>13</sup> C NMR of compound 6a                     | 27   |
| Figure S25. <sup>13</sup> C-APT NMR of compound 6a                 | 28   |
| Figure S26. <sup>1</sup> H- <sup>1</sup> H COSY of compound 6a     | 29   |
| Figure S27. <sup>1</sup> H- <sup>13</sup> C HSQC of compound 6a    | 32   |
| Figure S28. <sup>1</sup> H NMR of compound 6b                      | 35   |
| Figure S29. <sup>13</sup> C NMR of compound 6b                     | 36   |
| Figure S30. <sup>13</sup> C-APT NMR of compound 6b                 | 37   |
| Figure S31. <sup>1</sup> H NMR of compound 6c                      | 38   |
| Figure S32. <sup>13</sup> C NMR of compound 6c                     | 39   |
| Figure S33. <sup>1</sup> H- <sup>1</sup> H COSY of compound 6c     | 40   |
| Figure S34. <sup>1</sup> H- <sup>13</sup> C HSQC of compound 6c    | 41   |

|                                                                               |    |
|-------------------------------------------------------------------------------|----|
| <b>Figure S35.</b> <sup>1</sup> H NMR of compound <b>6d</b>                   | 43 |
| <b>Figure S36.</b> <sup>13</sup> C NMR of compound <b>6d</b>                  | 44 |
| <b>Figure S37.</b> <sup>13</sup> C-APT NMR of compound <b>6d</b>              | 45 |
| <b>Figure S38.</b> <sup>1</sup> H NMR of compound <b>6e</b>                   | 46 |
| <b>Figure S39.</b> <sup>13</sup> C NMR of compound <b>6e</b>                  | 47 |
| <b>Figure S40.</b> <sup>13</sup> C-APT NMR of compound <b>6e</b>              | 48 |
| <b>Figure S41.</b> <sup>1</sup> H- <sup>1</sup> H COSY of compound <b>6e</b>  | 49 |
| <b>Figure S42.</b> <sup>1</sup> H NMR of compound <b>8a</b>                   | 50 |
| <b>Figure S43.</b> <sup>13</sup> C NMR of compound <b>8a</b>                  | 52 |
| <b>Figure S44.</b> <sup>13</sup> C-APT NMR of compound <b>8a</b>              | 53 |
| <b>Figure S45.</b> <sup>1</sup> H NMR of compound <b>8b</b>                   | 54 |
| <b>Figure S46.</b> <sup>13</sup> C NMR of compound <b>8b</b>                  | 55 |
| <b>Figure S47.</b> <sup>13</sup> C APT NMR of compound <b>8b</b>              | 56 |
| <b>Figure S48.</b> <sup>1</sup> H- <sup>1</sup> H COSY of compound <b>8b</b>  | 57 |
| <b>Figure S49.</b> <sup>1</sup> H- <sup>13</sup> C HSQC of compound <b>8b</b> | 58 |
| <b>Figure S50.</b> <sup>1</sup> H NMR of compound <b>8c</b>                   | 61 |
| <b>Figure S51.</b> <sup>13</sup> C NMR of compound <b>8c</b>                  | 62 |
| <b>Figure S52.</b> <sup>13</sup> C APT NMR of compound <b>8c</b>              | 63 |
| <b>Figure S53.</b> <sup>1</sup> H NMR of compound <b>8d</b>                   | 64 |
| <b>Figure S54.</b> <sup>13</sup> C NMR of compound <b>8d</b>                  | 65 |
| <b>Figure S55.</b> <sup>13</sup> C APT NMR of compound <b>8d</b>              | 66 |
| <b>Figure S56.</b> <sup>1</sup> H- <sup>1</sup> H COSY of compound <b>8d</b>  | 67 |

### List of Tables

| <b>Contents</b>                                                                                                       | <b>Page</b> |
|-----------------------------------------------------------------------------------------------------------------------|-------------|
| <b>Table S1.</b> Crystal structure and data for compound <b>3f</b>                                                    | 68          |
| <b>Table S2.</b> Crystal structure and data for compound <b>4</b>                                                     | 69          |
| <b>Table S3.</b> Crystal structure and data for compound <b>6a</b>                                                    | 70          |
| <b>Table S4.</b> Crystal structure and data for compound <b>6d</b>                                                    | 71          |
| <b>Table S5.</b> Crystal structure and data for compound <b>6e</b>                                                    | 72          |
| <b>Table S6.</b> Crystal structure and data for compound <b>8c</b>                                                    | 73          |
| <b>Table S7.</b> Cartesian coordinates for the optimized geometries at B3LYP/6-31G(d) (solvent model) level of theory | 74          |

INN-SOHAN-185-1H

Current Data Parameters  
NAME INN-SOHAN-185-1H  
EXPNO 2  
PROCNO 1

F2 - Acquisition Parameters  
Date\_ 20150320  
Time\_ 17.38  
INSTRUM spect  
PROBHD 5 mm PABBO BB/  
PULPROG zg30  
TD 65536  
SOLVENT DMSO  
NS 13  
DS 2  
SWH 10000.000 Hz  
FIDRES 0.152588 Hz  
AQ 3.2767999 sec  
RG 30.72  
DW 50.000 usec  
DE 6.50 usec  
TE 298.9 K  
D1 1.00000000 sec  
TDO 1

===== CHANNEL f1 =====  
SFO1 500.1330885 MHz  
NUC1 1H  
P1 13.00 usec  
PLW1 13.00000000 W

F2 - Processing parameters  
SI 65536  
SF 500.1300000 MHz  
WDW EM  
SSB 0  
LB 0.30 Hz  
GB 0  
PC 1.00

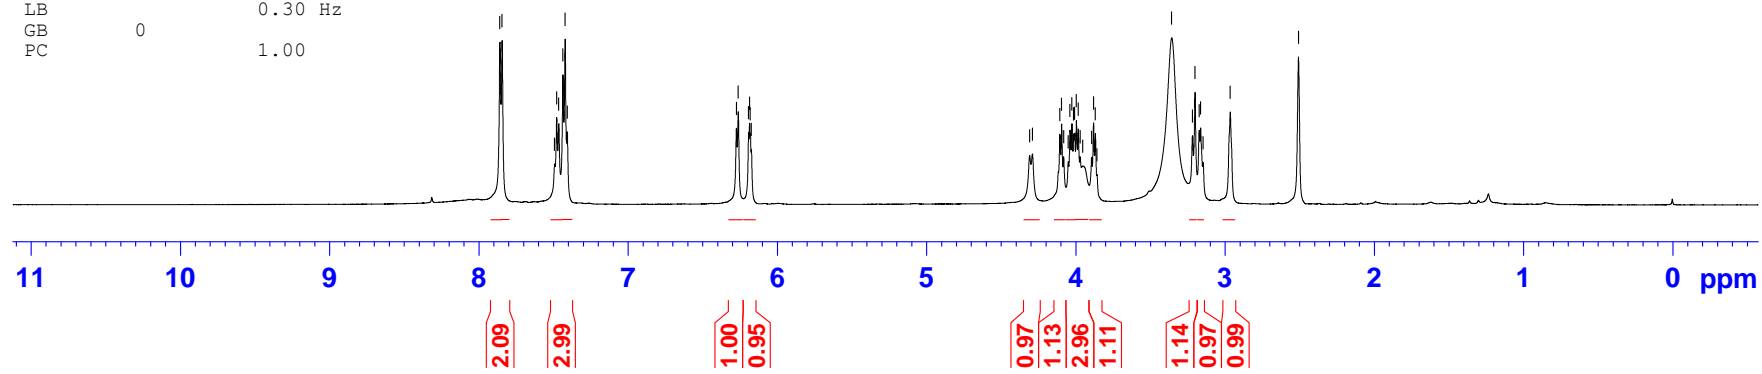

Figure S1. <sup>1</sup>H NMR of compound 3a

INN-TGL-04-54-13C

Current Data Parameters  
NAME INN-TGL-04-54-13C  
EXPNO 12  
PROCNO 1

F2 - Acquisition Parameters  
Date\_ 20260121  
Time\_ 3.55 h  
INSTRUM Avance Neo 400  
PROBHD Z163739\_0226 (  
PULPROG zgpg30  
TD 65536  
SOLVENT DMSO  
NS 5000  
DS 0  
SWH 27777.778 Hz  
FIDRES 0.847710 Hz  
AQ 1.1796480 sec  
RG 101  
DW 18.000 usec  
DE 6.50 usec  
TE 295.3 K  
D1 1.00000000 sec  
D11 0.03000000 sec  
TD0 1  
SFO1 100.6242384 MHz  
NUC1 13C  
P0 2.67 usec  
P1 8.00 usec  
PLW1 97.00000000 W  
SFO2 400.1316005 MHz  
NUC2 1H  
CPDPRG[2] waltz65  
PCPD2 90.00 usec  
PLW2 25.07999992 W  
PLW12 0.19815999 W  
PLW13 0.09967500 W

F2 - Processing parameters  
SI 32768  
SF 100.6127665 MHz  
WDW EM  
SSB 0  
LB 1.00 Hz  
GB 0  
PC 1.40

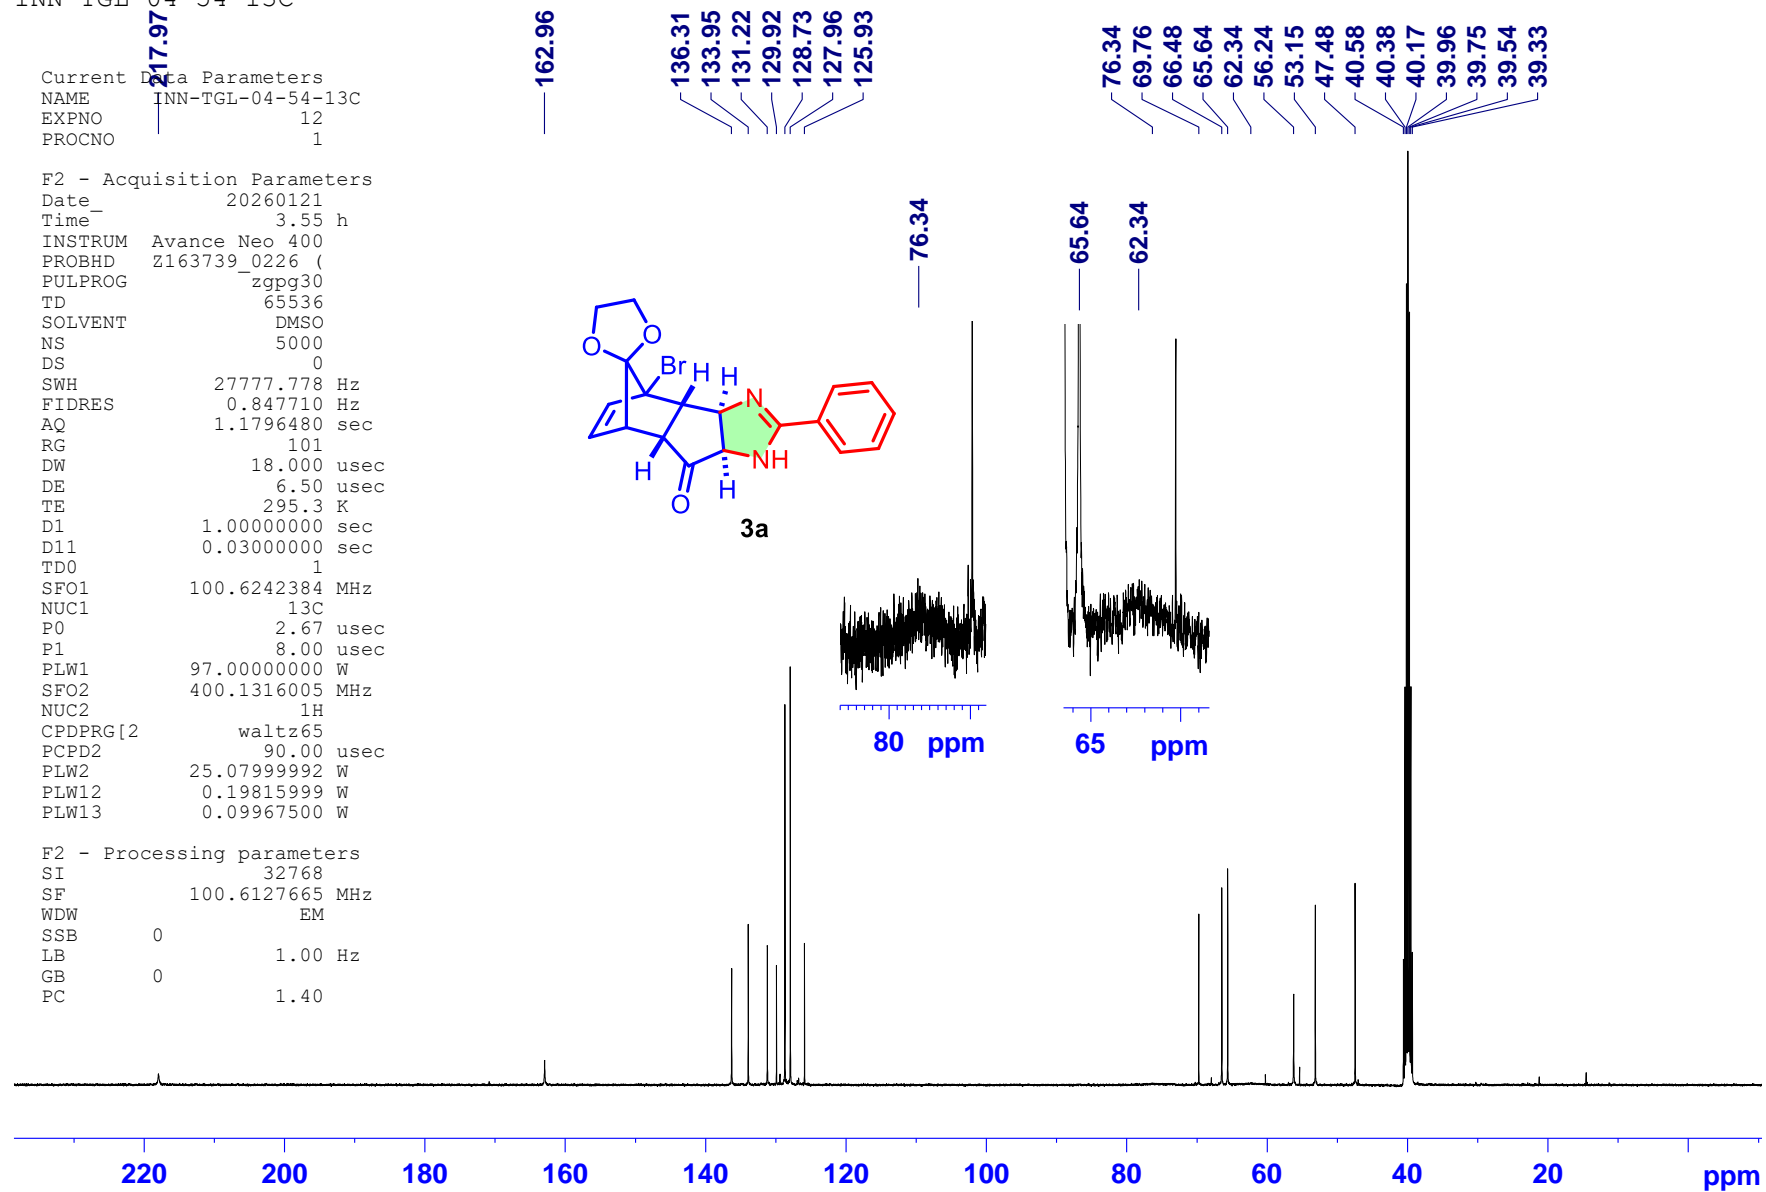

Figure S2. <sup>13</sup>C NMR of compound 3a

INN-TGL-04-55-01-01-1H-WS

Current Data Parameters  
NAME INN-TGL-04-55-01-01-1H-WS  
EXPNO 7  
PROCNO 1

F2 - Acquisition Parameters  
Date\_ 20260208  
Time 20.00 h  
INSTRUM Avance  
PROBHD z163739\_0705 (   
PULPROG zgpr  
TD 51724  
SOLVENT DMSO  
NS 50  
DS 4  
SWH 11904.762 Hz  
FIDRES 0.460319 Hz  
AQ 2.1724081 sec  
RG 101  
DW 42.000 usec  
DE 10.66 usec  
TE 297.8 K  
D1 1.00000000 sec  
D12 0.00002000 sec  
TD0 1  
SFO1 400.3014394 MHz  
NUC1 1H  
P1 8.00 usec  
PLW1 20.78400040 W  
PLW9 0.00005321 W

F2 - Processing parameters  
SI 32768  
SF 400.3000036 MHz  
WDW EM  
SSB 0  
LB 0.30 Hz  
GB 0  
PC 1.00

7.772  
7.751  
7.633  
7.612  
6.258  
6.242  
6.165  
6.156  
6.141  
4.297  
4.273  
4.082  
4.068  
4.052  
4.029  
4.014  
3.998  
3.987  
3.974  
3.959  
3.945  
3.876  
3.859  
3.845  
3.161  
2.946  
2.502

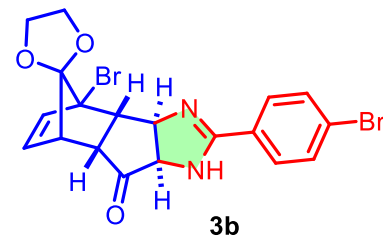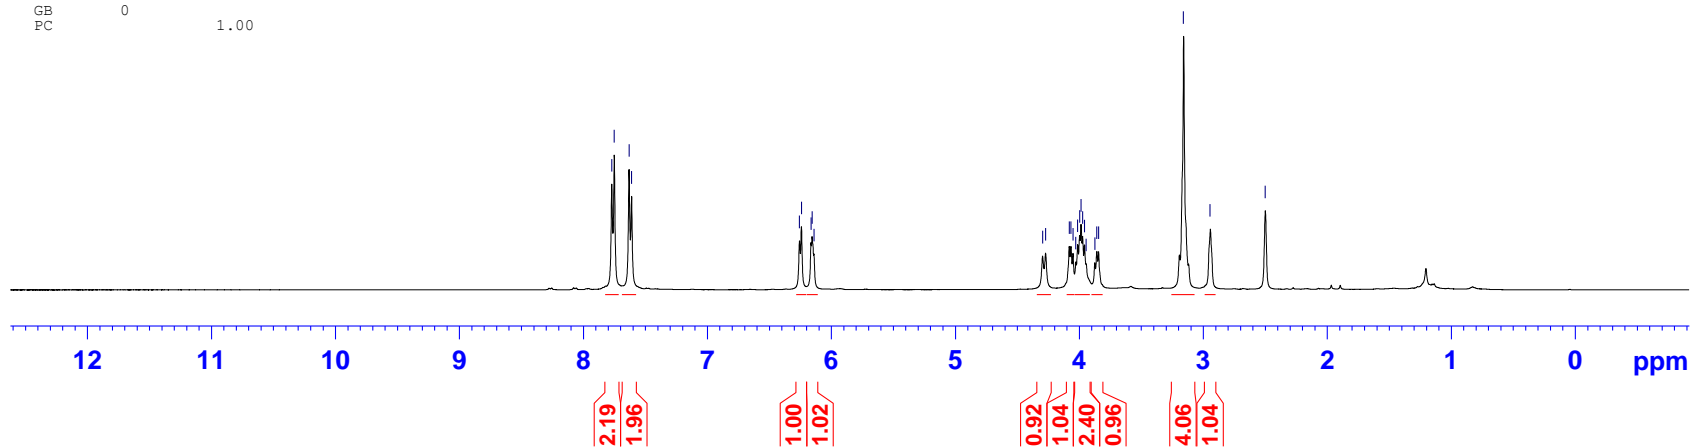

Figure S3. <sup>1</sup>H NMR of compound 3b

INN-TGL-04-55-01-13C

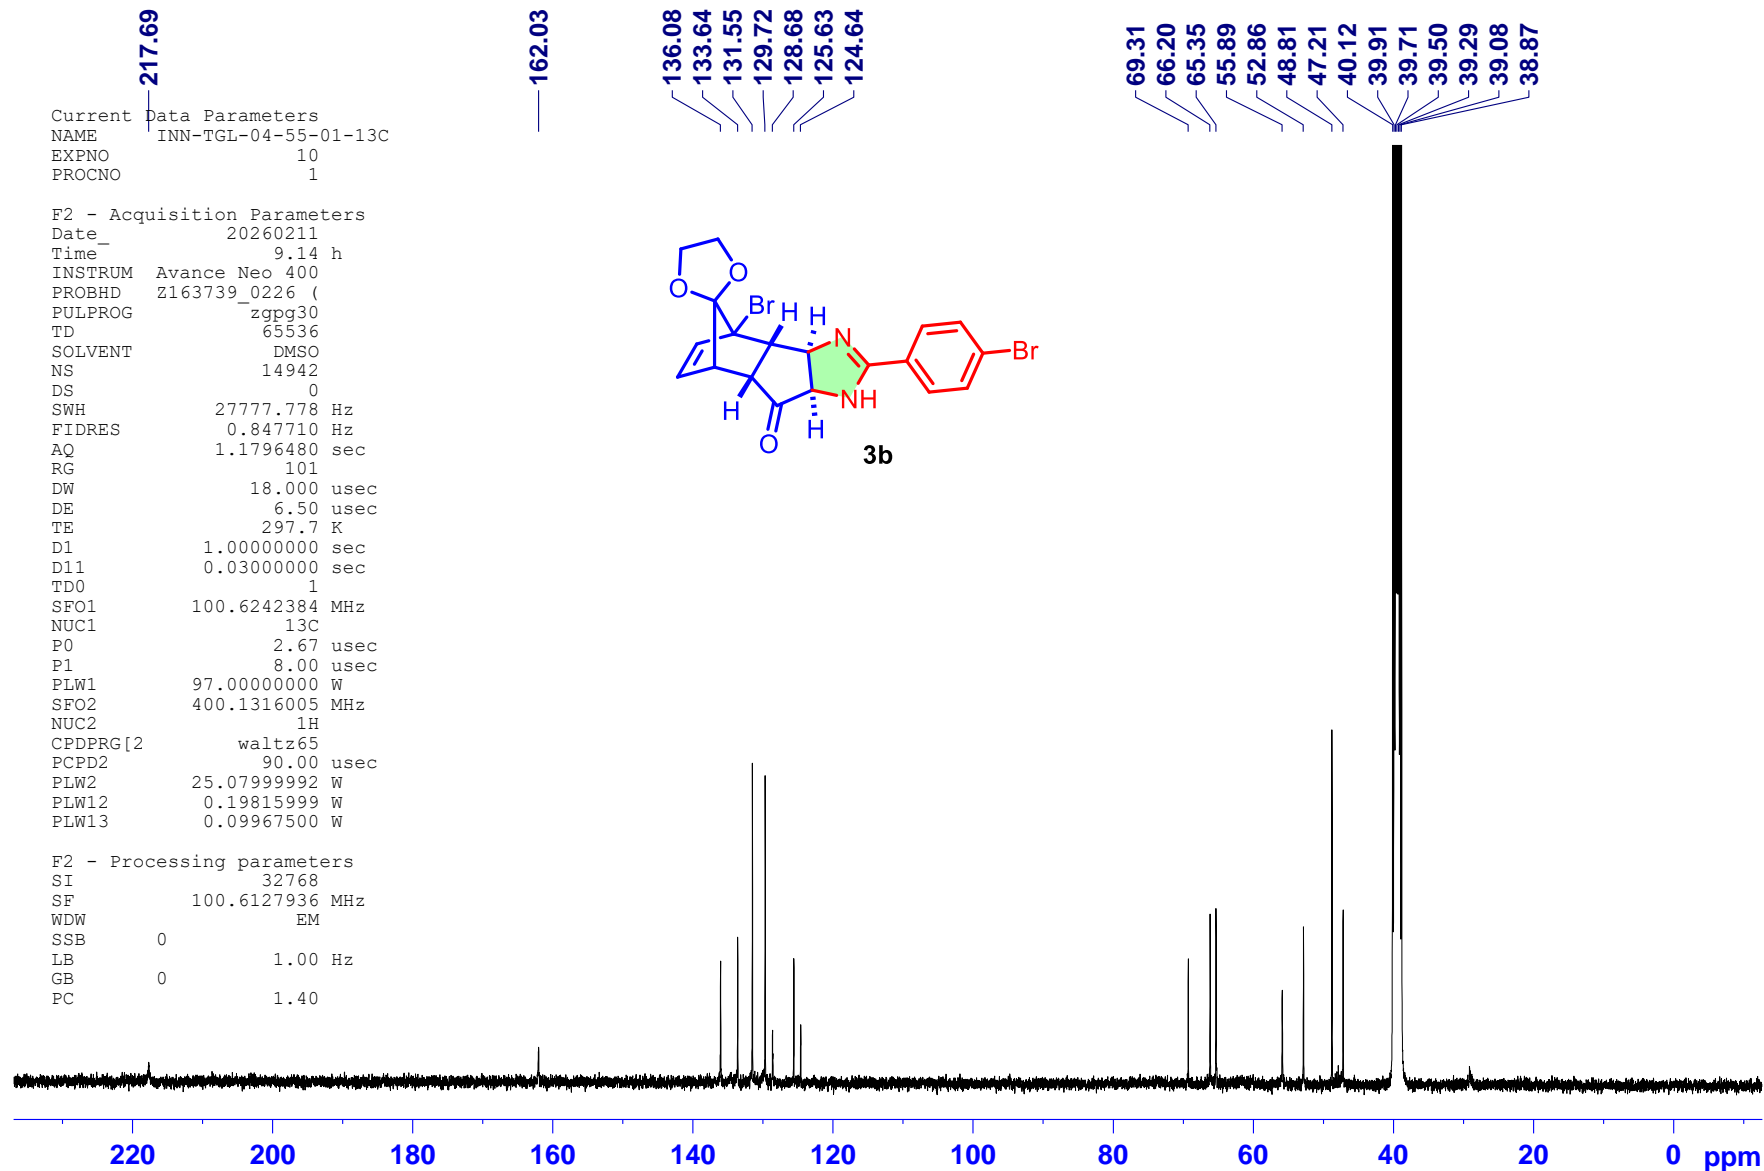

Figure S4. <sup>13</sup>C NMR of compound 3b

INN-SOHAN-II-207-1H

Current Data Parameters  
NAME INN-SOHAN-II-207-1H  
EXPNO 7  
PROCNO 1

F2 - Acquisition Parameters  
Date\_ 20171015  
Time\_ 0.13  
INSTRUM spect  
PROBHD 5 mm PABBO BB/  
PULPROG zg30  
TD 65536  
SOLVENT DMSO  
NS 81  
DS 0  
SWH 10000.000 Hz  
FIDRES 0.152588 Hz  
AQ 3.2767999 sec  
RG 48.36  
DW 50.000 usec  
DE 6.50 usec  
TE 295.7 K  
D1 1.00000000 sec  
TD0 1

==== CHANNEL f1 =====  
SFO1 500.1330885 MHz  
NUC1 1H  
P1 13.35 usec  
PLW1 16.00000000 W

F2 - Processing parameters  
SI 65536  
SF 500.1300135 MHz  
WDW EM  
SSB 0  
LB 0.30 Hz  
GB 0  
PC 1.00

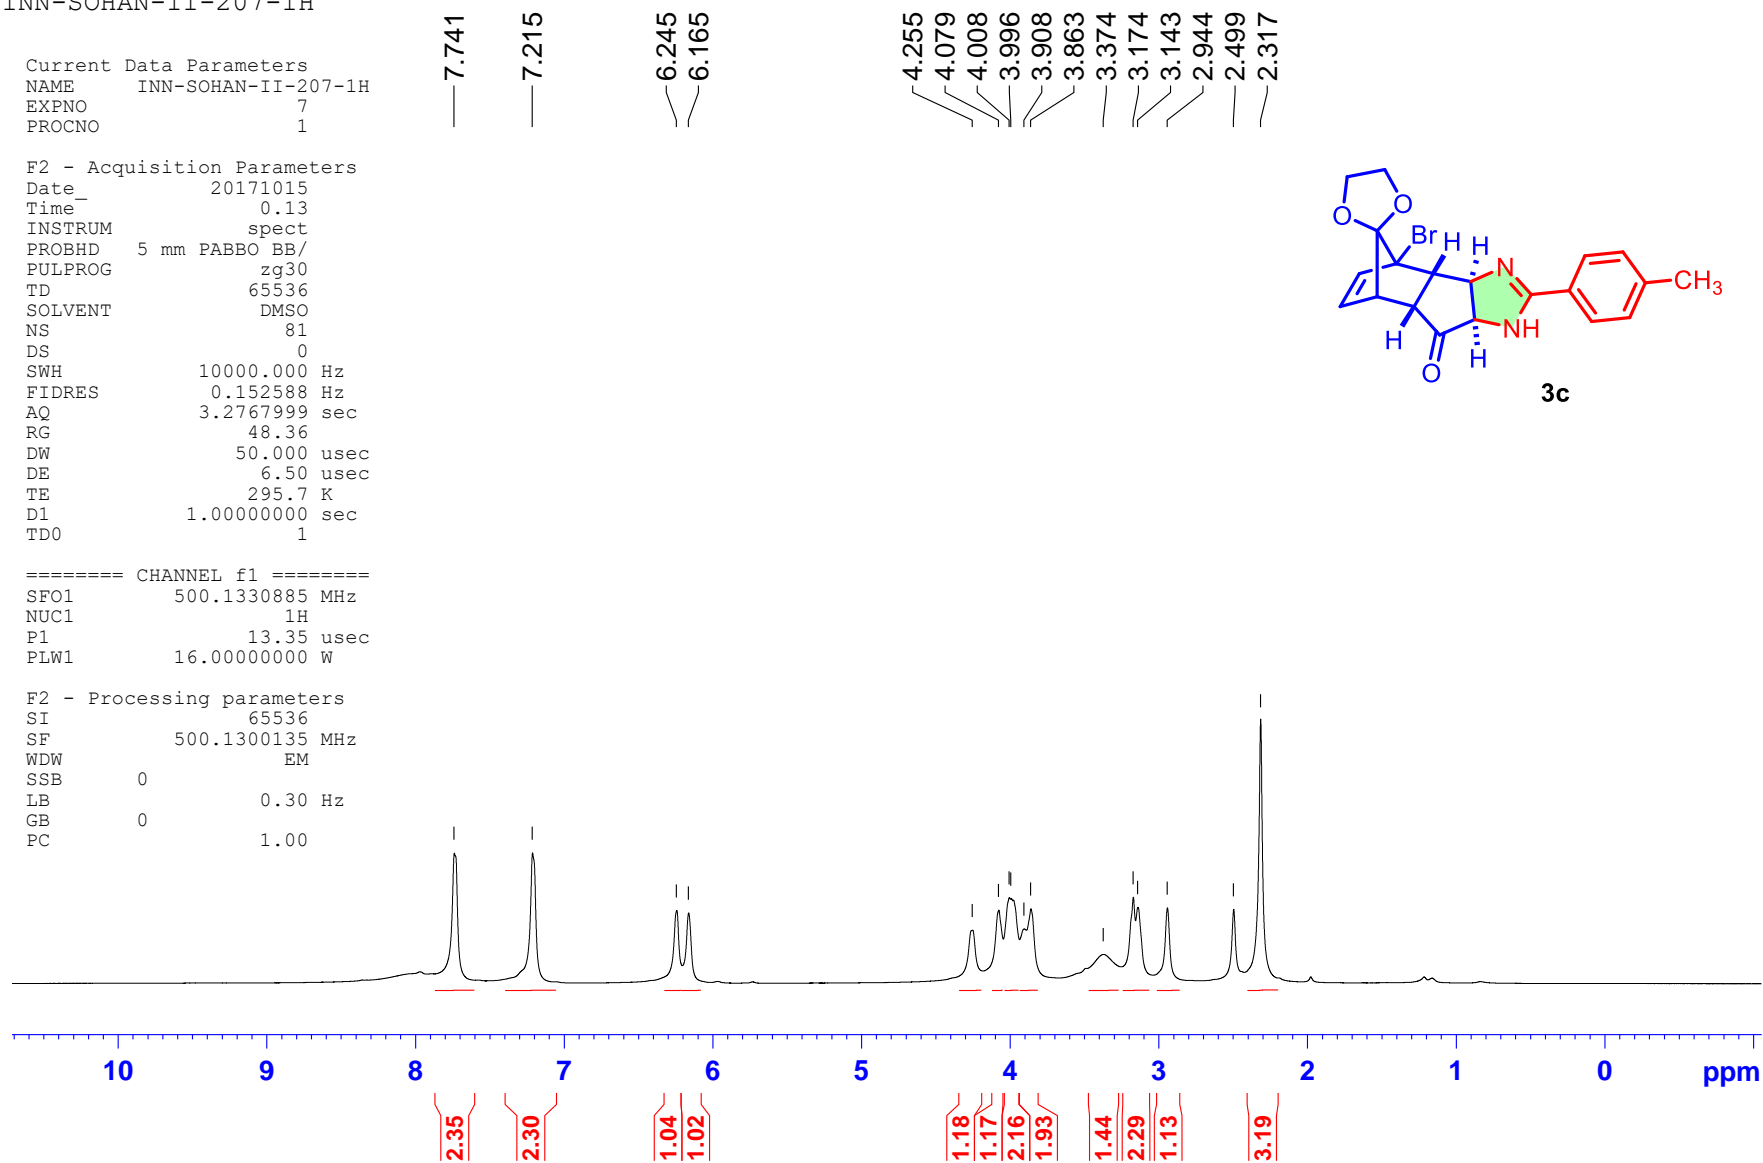

Figure S5. <sup>1</sup>H NMR of compound 3c

INN-SOHAN-II-207-13C

Current Data Parameters  
NAME INN-SOHAN-II-207-13C  
EXPNO 8  
PROCNO 1

F2 - Acquisition Parameters  
Date\_ 20171015  
Time\_ 0.20  
INSTRUM spect  
PROBHD 5 mm PABBO BB/  
PULPROG zgpg30  
TD 65536  
SOLVENT DMSO  
NS 15000  
DS 0  
SWH 33333.332 Hz  
FIDRES 0.508626 Hz  
AQ 0.9830400 sec  
RG 197.27  
DW 15.000 usec  
DE 6.50 usec  
TE 295.9 K  
D1 1.00000000 sec  
D11 0.03000000 sec  
TDO 1

=====  
CHANNEL f1  
SFO1 125.7716224 MHz  
NUC1 13C  
P1 8.90 usec  
PLW1 103.0000000 W

=====  
CHANNEL f2  
SFO2 500.1320005 MHz  
NUC2 1H  
CPDPRG[2] waltz16  
PCPD2 80.00 usec  
PLW2 16.00000000 W  
PLW12 0.44556001 W  
PLW13 0.22411001 W

F2 - Processing parameters  
SI 32768  
SF 125.7578508 MHz  
WDW EM  
SSB 0  
LB 1.00 Hz  
GB 0  
PC 1.40

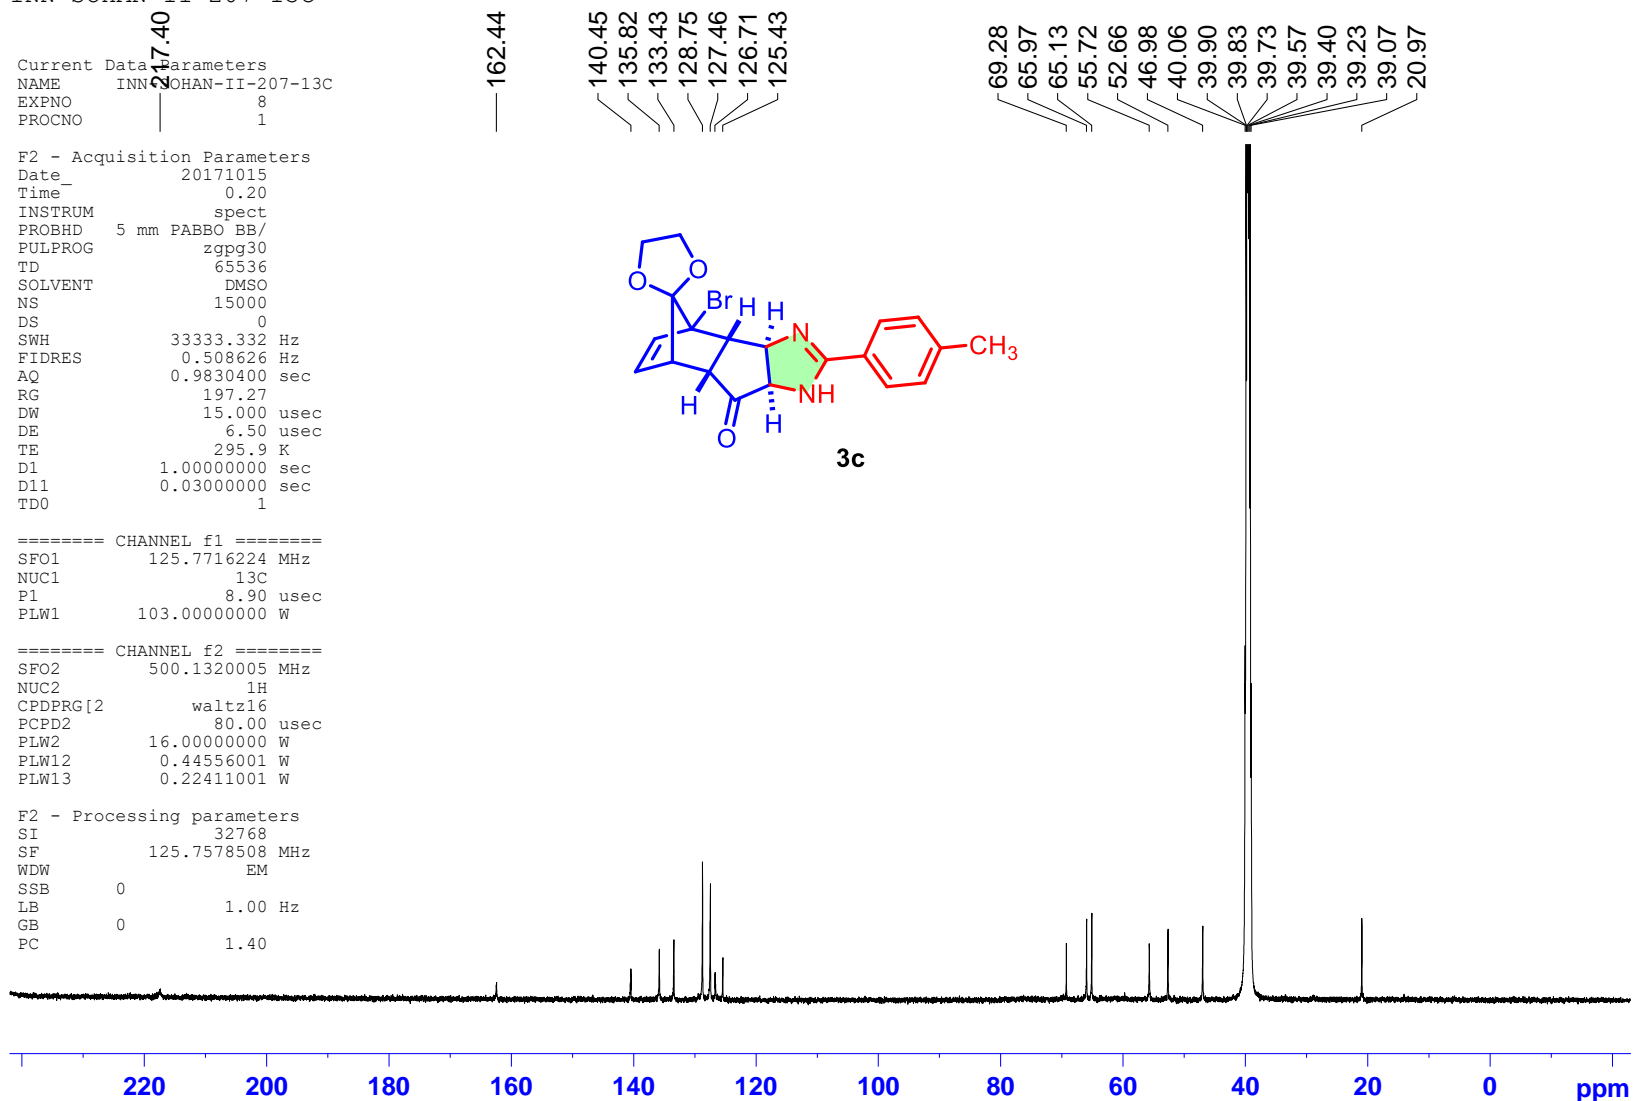

Figure S6. <sup>13</sup>C NMR of compound 3c

INN-SOHAN-II-207-APT

Current Data Parameters  
NAME INN-SOHAN-II-207-APT  
EXPNO 9  
PROCNO 1

F2 - Acquisition Parameters  
Date\_ 20171015  
Time 22.23  
INSTRUM spect  
PROBHD 5 mm PABBO BB/  
PULPROG jmod  
TD 65536  
SOLVENT DMSO  
NS 3602  
DS 0  
SWH 33333.332 Hz  
FIDRES 0.508626 Hz  
AQ 0.9830400 sec  
RG 197.27  
DW 15.000 usec  
DE 6.50 usec  
TE 295.8 K  
CNST2 145.0000000  
CNST11 1.0000000  
D1 1.00000000 sec  
D20 0.00689655 sec  
TD0 1

=====  
CHANNEL f1  
SFO1 125.7716224 MHz  
NUC1 13C  
P1 8.90 usec  
P2 17.80 usec  
PLW1 103.00000000 W

=====  
CHANNEL f2  
SFO2 500.1320005 MHz  
NUC2 1H  
CPDPRG[2] waltz16  
PCPD2 80.00 usec  
PLW2 16.00000000 W  
PLW12 0.44556001 W

F2 - Processing parameters  
SI 32768  
SF 125.7578517 MHz  
WDW EM  
SSB 0  
LB 1.00 Hz  
GB 0  
PC 1.40

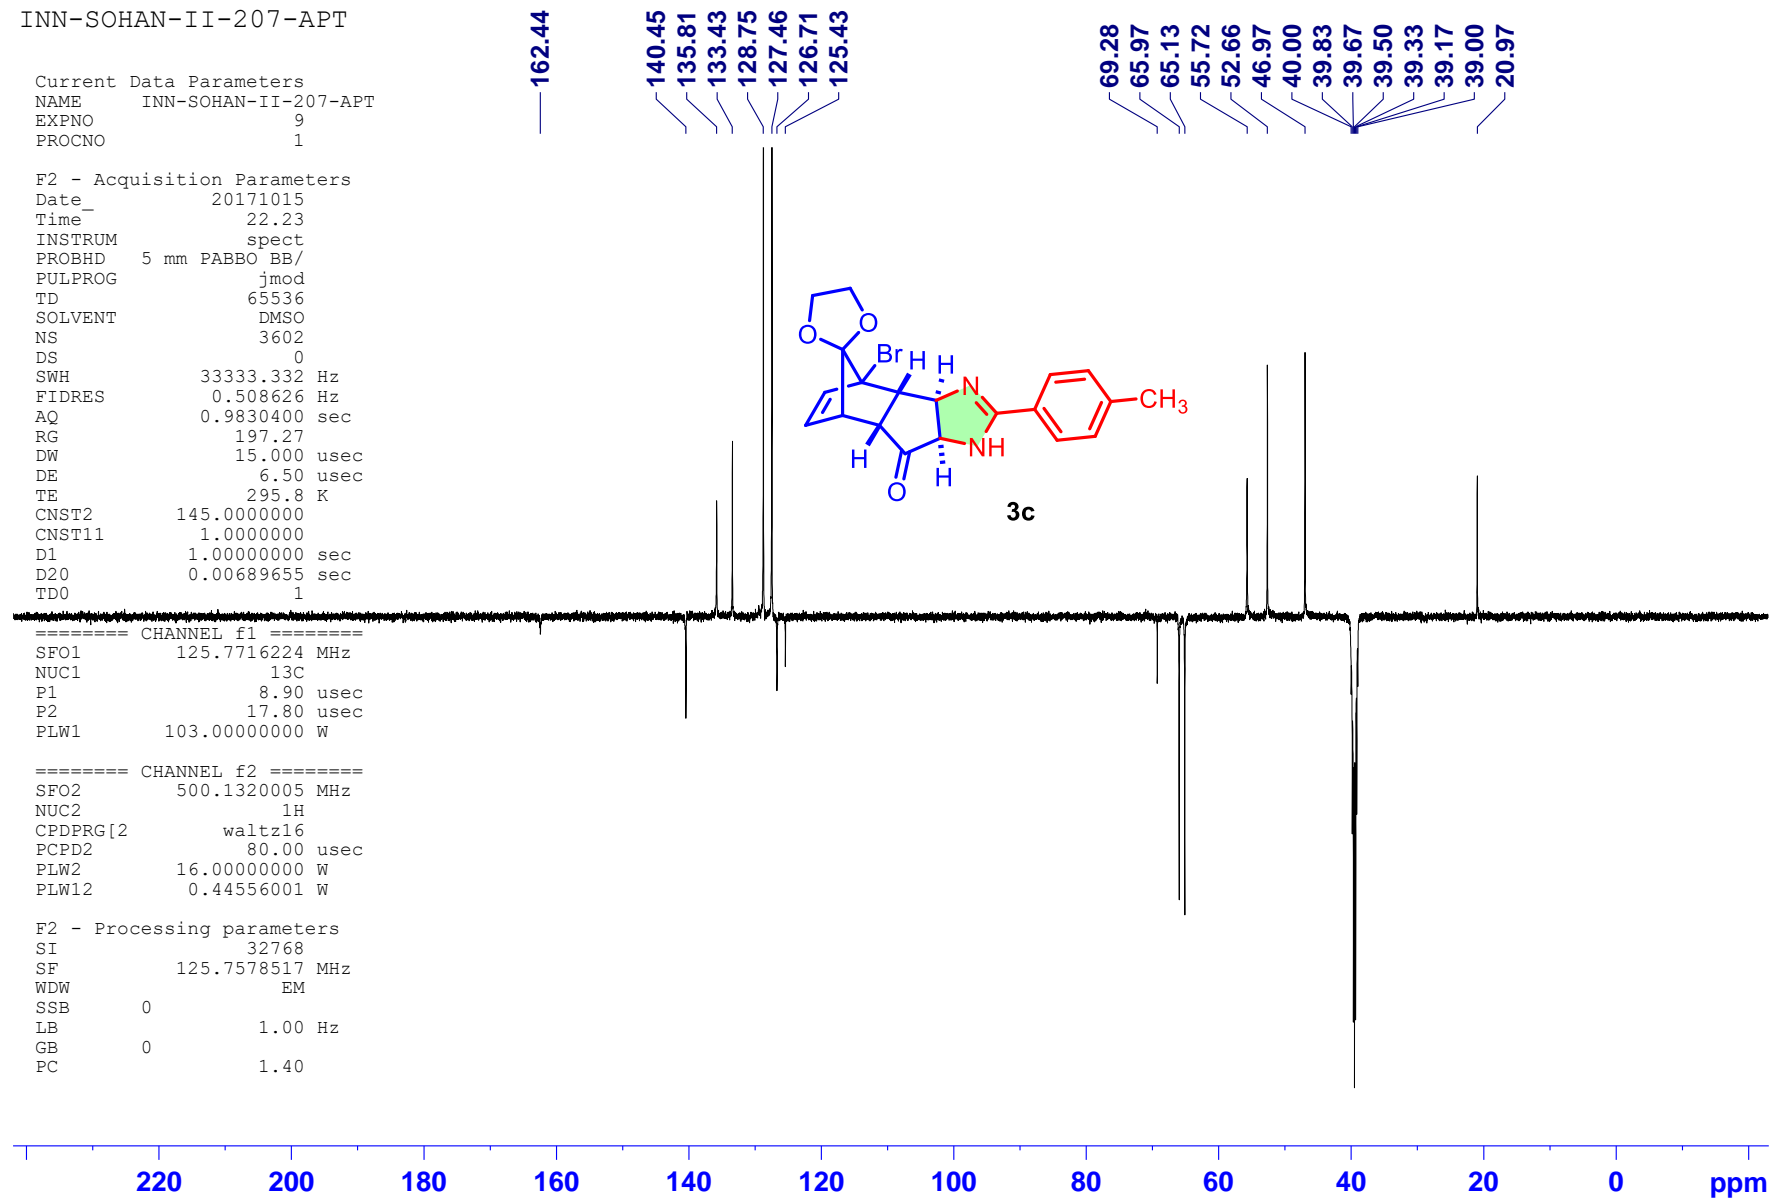

Figure S7. <sup>13</sup>C-APT NMR of compound 3c

INN-SOHAN-II-29-1H

Current Data Parameters  
NAME INN-SOHAN-II-29-1H  
EXPNO 21  
PROCNO 1

F2 - Acquisition Parameters  
Date\_ 20180419  
Time\_ 21.57  
INSTRUM spect  
PROBHD 5 mm PABBO BB/  
PULPROG zg30  
TD 65536  
SOLVENT CDC13  
NS 30  
DS 0  
SWH 10000.000 Hz  
FIDRES 0.152588 Hz  
AQ 3.2767999 sec  
RG 30.72  
DW 50.000 usec  
DE 6.50 usec  
TE 298.0 K  
D1 1.00000000 sec  
TDO 1

==== CHANNEL f1 =====  
SF01 500.1330885 MHz  
NUC1 1H  
P1 13.35 usec  
PLW1 16.00000000 W

F2 - Processing parameters  
SI 65536  
SF 500.1300150 MHz  
WDW EM  
SSB 0  
LB 0.30 Hz  
GB 0  
PC 1.00

7.729 7.714 7.421 7.407 7.393 7.356 7.340 7.325 7.260 6.245 6.128 6.123 6.118 5.262 4.263 4.244 3.747 3.729 3.233 3.199 3.191 3.182 3.174 2.975 2.965 2.958 2.949 1.567 1.550 1.470 1.453

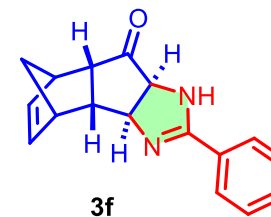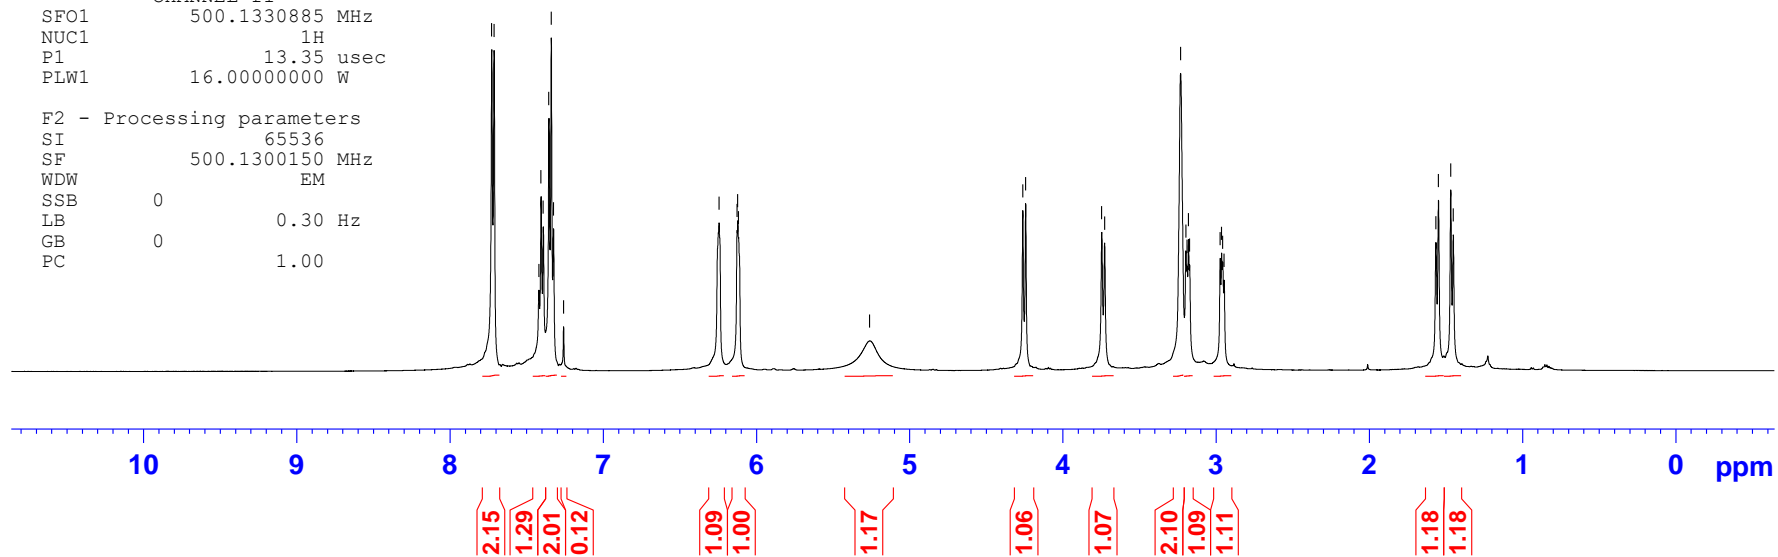

Figure S8. <sup>1</sup>H NMR of compound 3f

INN-SOHAN-II-29-13C

Current Data Parameters  
NAME INN-SOHAN-II-29-13C  
EXPNO 22  
PROCNO 1

F2 - Acquisition Parameters  
Date\_ 20180419  
Time 21.59  
INSTRUM spect  
PROBHD 5 mm PABBO BB/  
PULPROG zgpg30  
TD 65536  
SOLVENT CDC13  
NS 578  
DS 0  
SWH 33333.332 Hz  
FIDRES 0.508626 Hz  
AQ 0.9830400 sec  
RG 197.27  
DW 15.000 usec  
DE 6.50 usec  
TE 298.1 K  
D1 1.00000000 sec  
D11 0.03000000 sec  
TD0 1

----- CHANNEL f1 -----  
SFO1 125.7716224 MHz  
NUC1 13C  
P1 8.90 usec  
PLW1 103.00000000 W

----- CHANNEL f2 -----  
SFO2 500.1320005 MHz  
NUC2 1H  
CPDPRG[2] waltz16  
PCPD2 80.00 usec  
PLW2 16.00000000 W  
PLW12 0.44556001 W  
PLW13 0.22411001 W

F2 - Processing parameters  
SI 32768  
SF 125.7577778 MHz  
WDW EM  
SSB 0  
LB 1.00 Hz  
GB  
PC 1.40

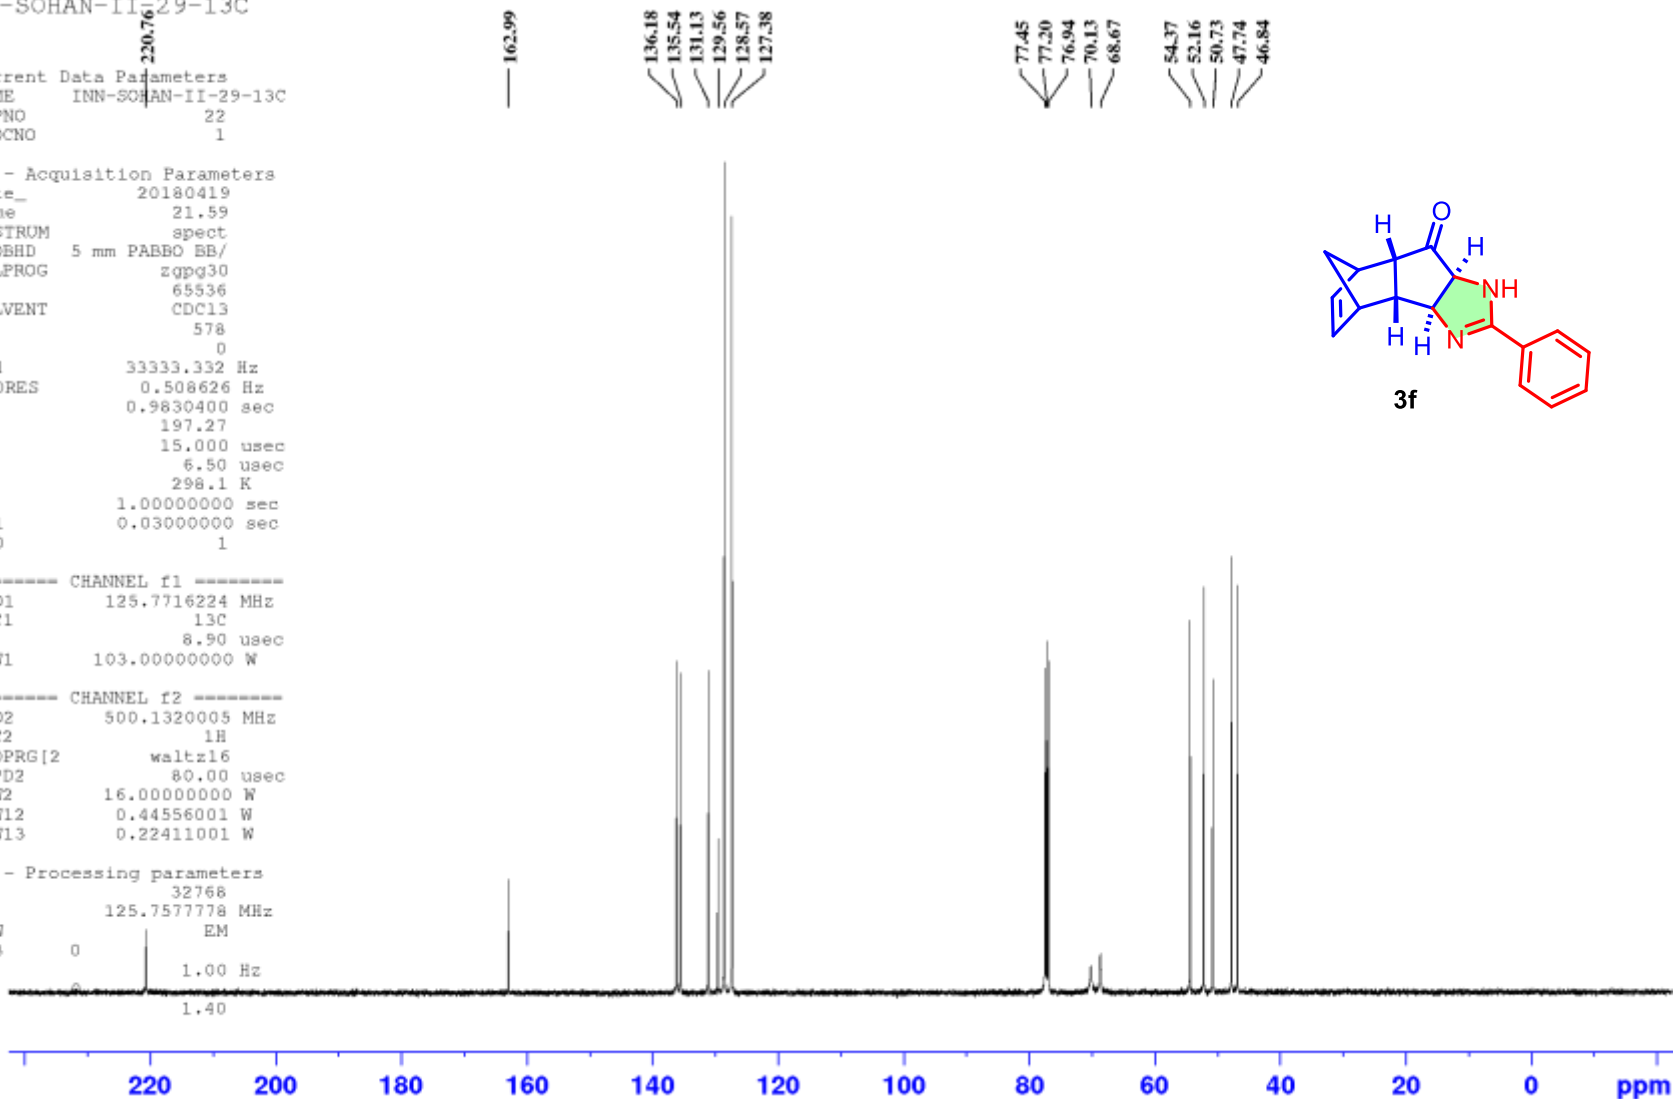

Figure S9. <sup>13</sup>C NMR of compound 3f

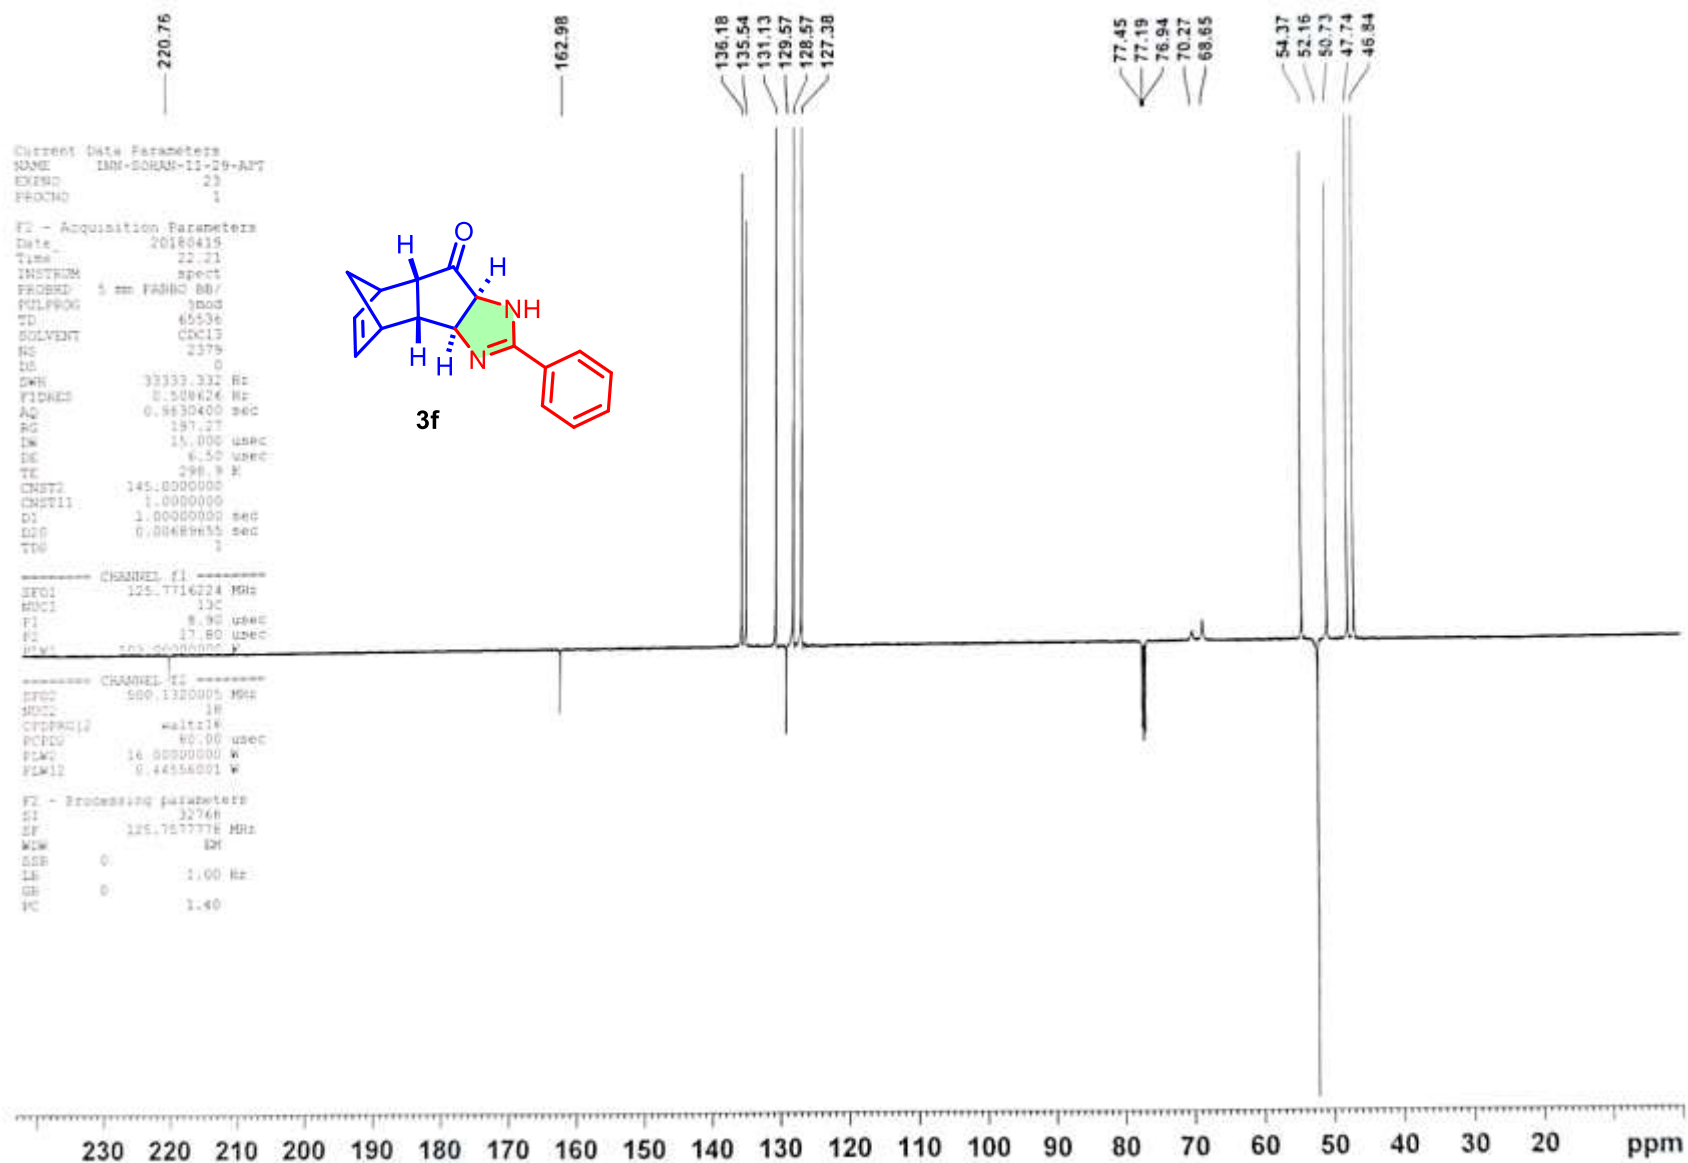

Figure S10. <sup>13</sup>C-APT NMR of compound 3f

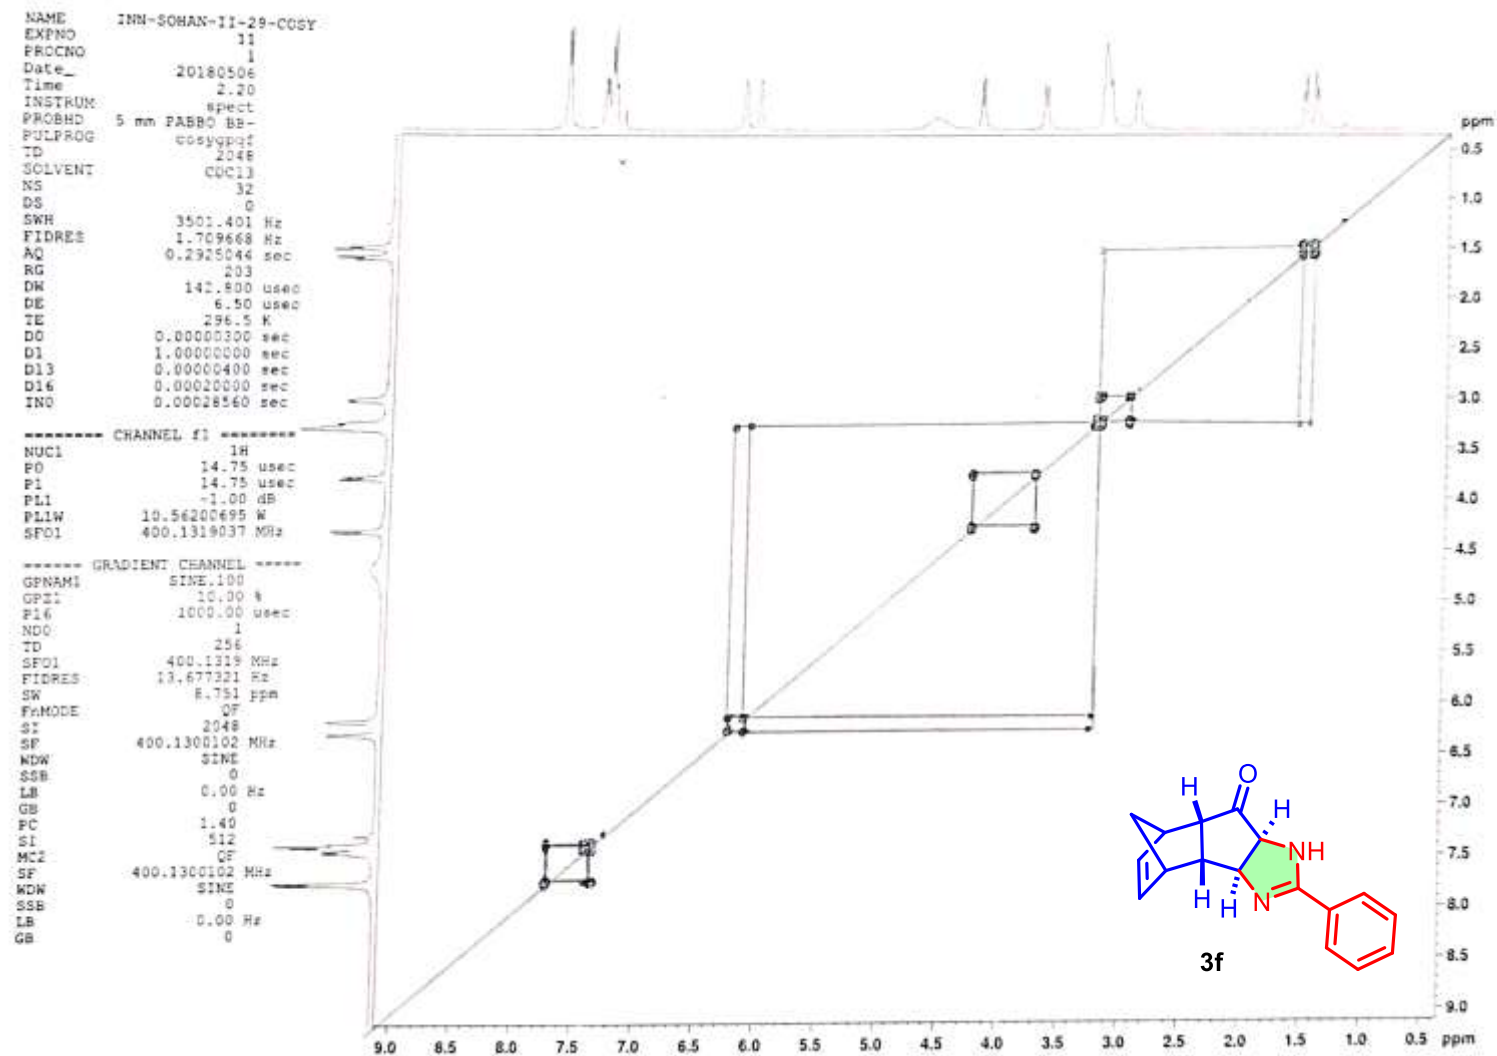

Figure S11.  $^1\text{H}$ - $^1\text{H}$  COSY NMR of compound **3f**

```

Current Data Parameters
NAME      INN-SOHAN-185B-1H
EXPNO     2
PROCNO    1

F2 - Acquisition Parameters
Date_     20151209
Time      10.54
INSTRUM   spect
PROBHD    5 mm PABBO BB/
FULPROG   zg30
TD         65536
SOLVENT   Acetone
NS         38
DS         2
SWH        10000.000 Hz
FIDRES     0.152588 Hz
AQ         3.2767999 sec
RG         61.42
DW         50.000 usec
DE         6.50 usec
TE         296.0 K
D1         1.00000000 sec
TDO        1

```

```

===== CHANNEL f1 =====
SFO1      500.1330885 MHz
NUC1       1H
P1         13.00 usec
PLW1       13.00000000 W

```

```

F2 - Processing parameters
SI         65536
SF         500.1300082 MHz
WDW        EM
SSB         0
LB         0.30 Hz
GB         0
PC         1.00

```

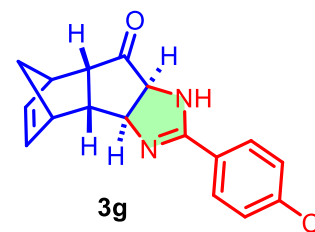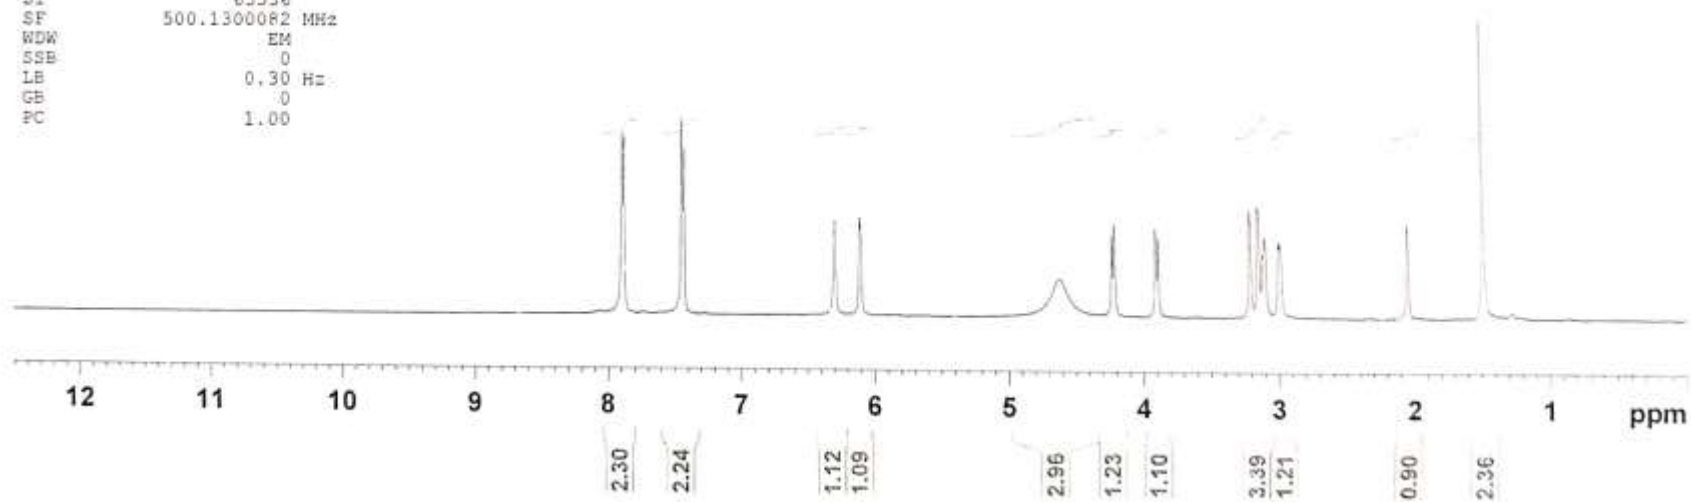

Figure S12. <sup>1</sup>H NMR of compound **3g**

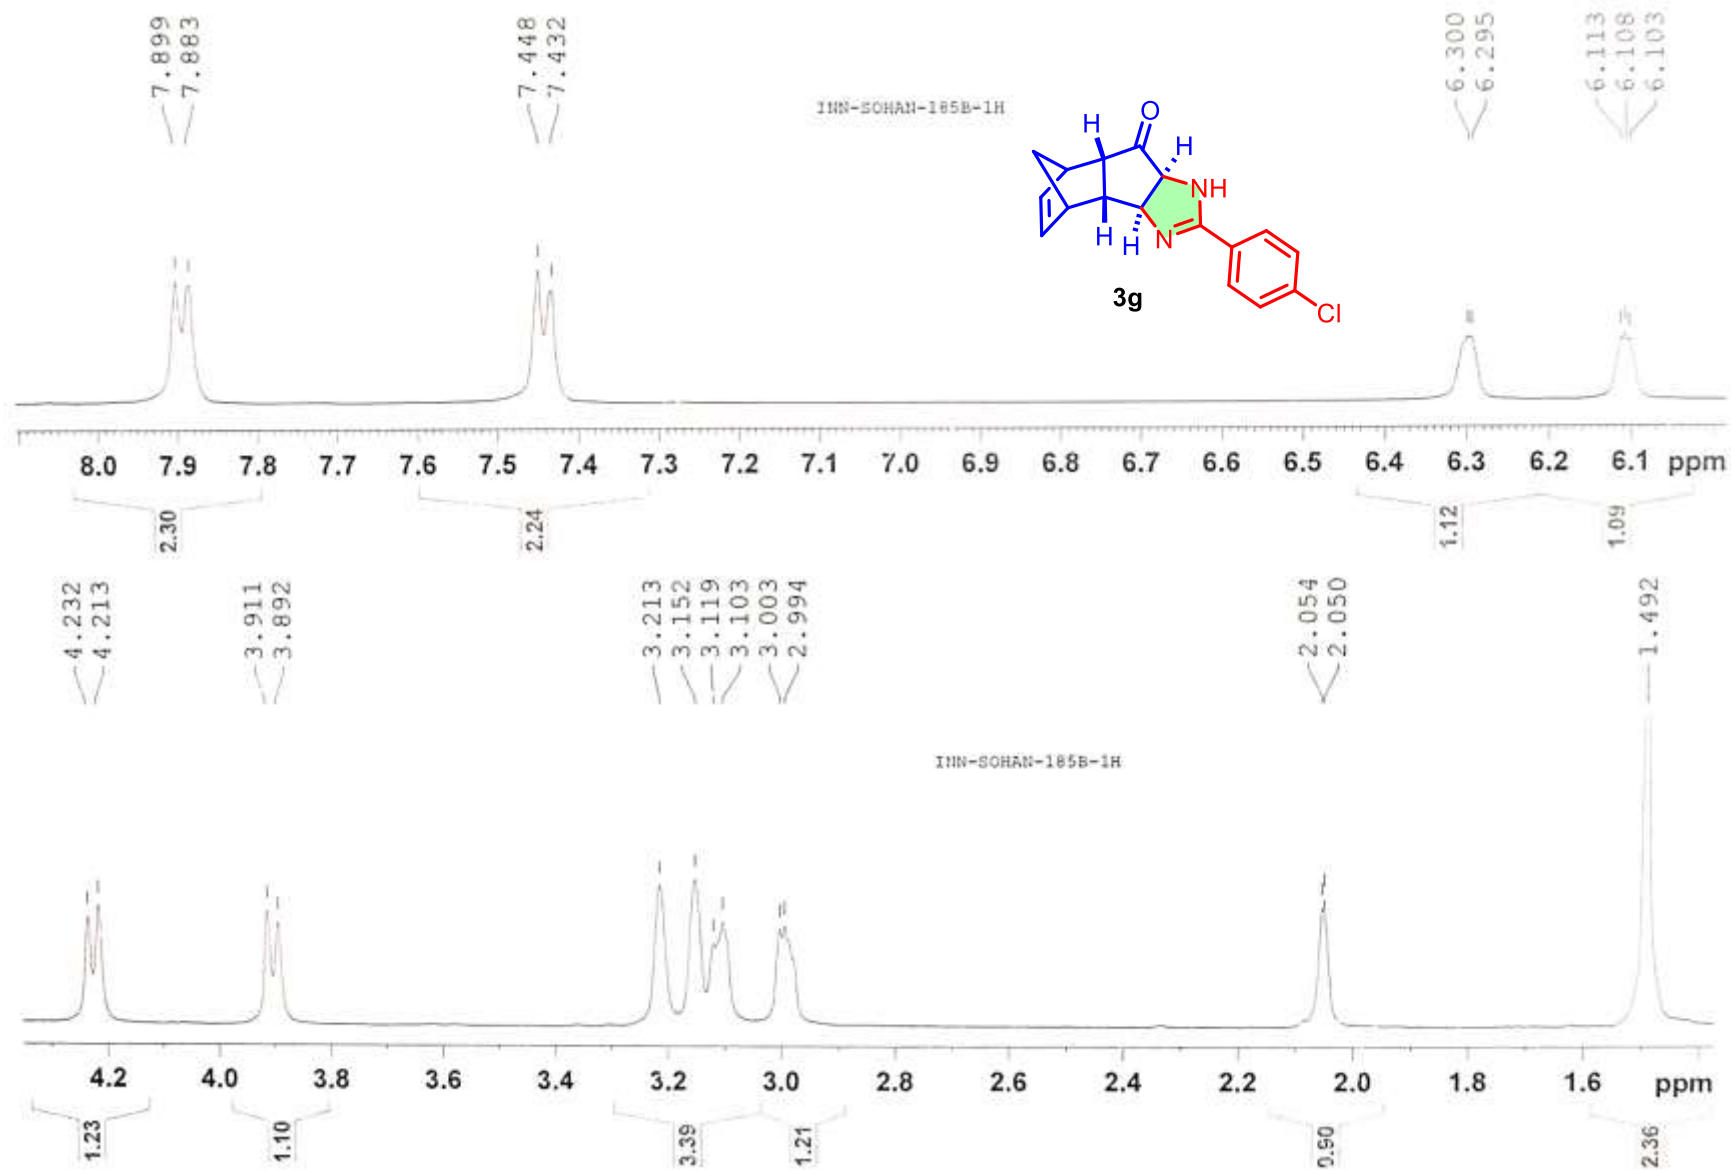

Figure S12a. <sup>1</sup>H NMR of compound 3g

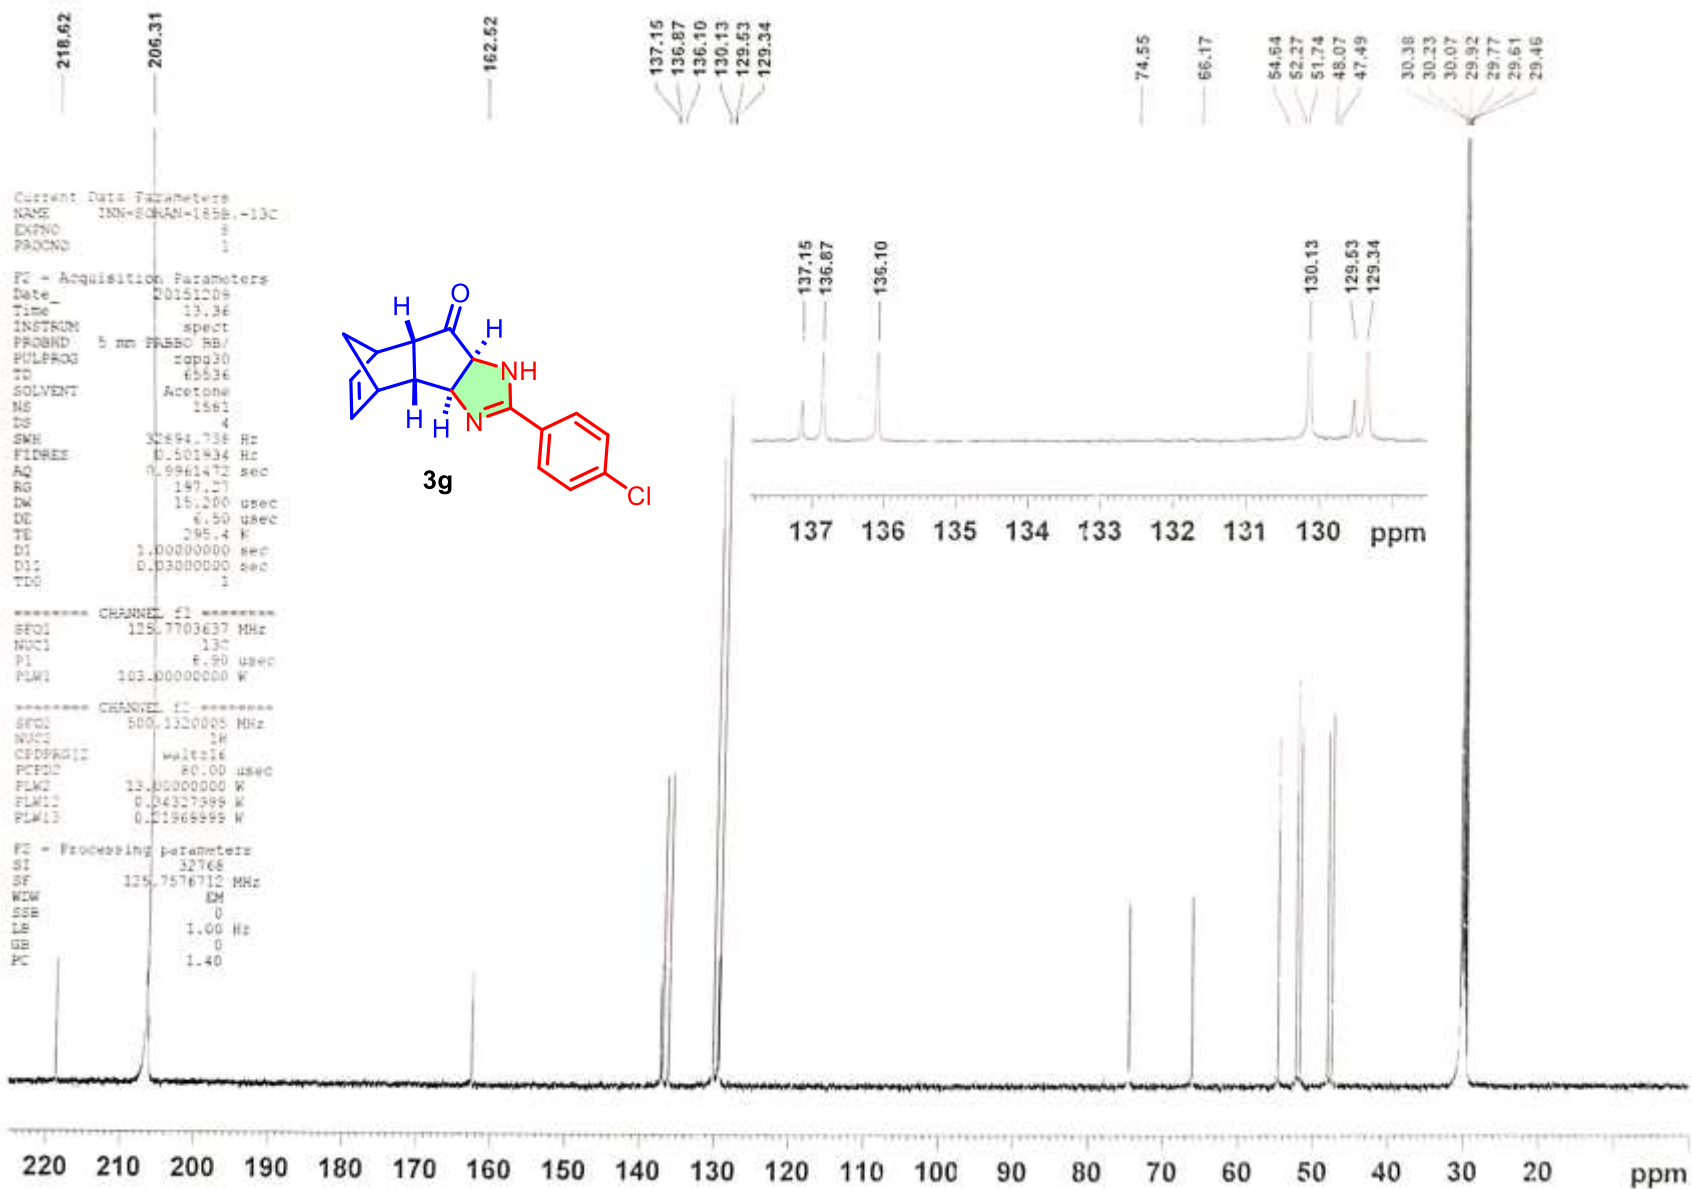

Figure S13. <sup>13</sup>C NMR of compound 3g

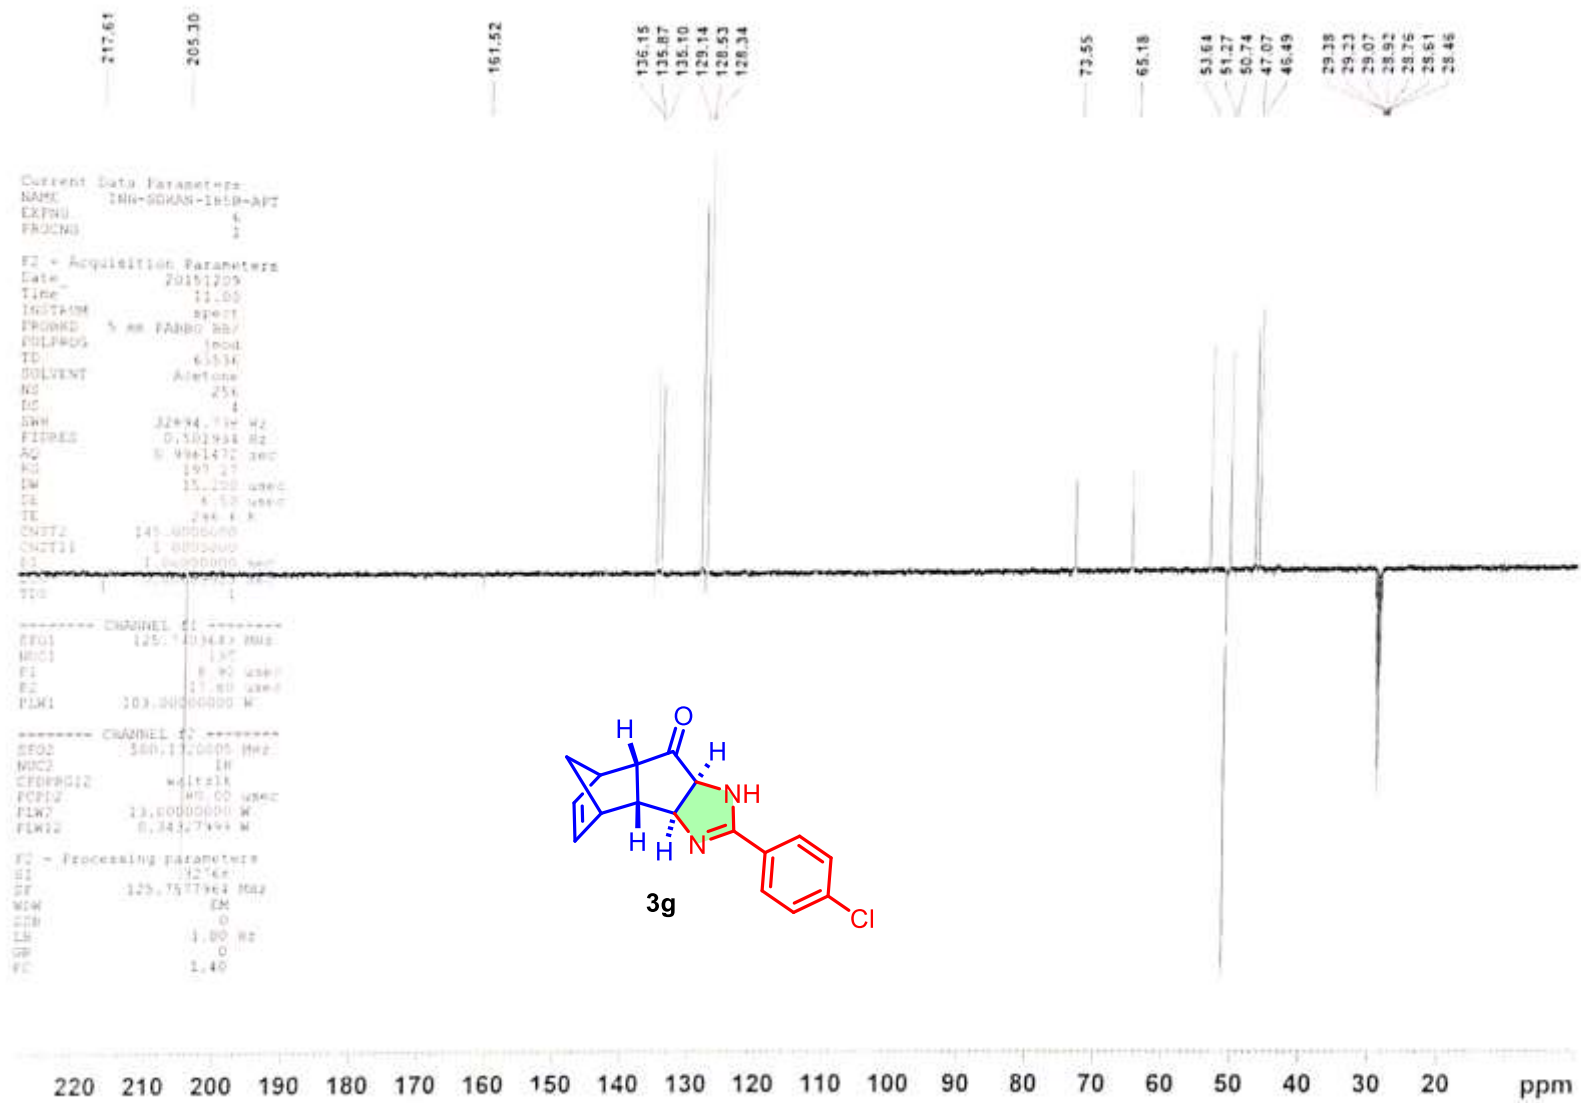

Figure S14. <sup>13</sup>C-APT NMR of compound 3g

INN-SOHAN-II-369-1H

Current Data Parameters  
NAME INN-SOHAN-II-369-1H  
EXPNO 21  
PROCNO 1

F2 - Acquisition Parameters  
Date\_ 20180508  
Time\_ 1.06  
INSTRUM spect  
PROBHD 5 mm PABBO BB/  
PULPROG zg30  
TD 65536  
SOLVENT CDCl3  
NS 60  
DS 0  
SWH 10000.000 Hz  
FIDRES 0.152588 Hz  
AQ 3.2767999 sec  
RG 30.72  
DW 50.000 usec  
DE 6.50 usec  
TE 297.5 K  
D1 1.00000000 sec  
TD0 1

==== CHANNEL f1 =====  
SFO1 500.1330885 MHz  
NUC1 1H  
P1 13.35 usec  
PLW1 16.00000000 W

F2 - Processing parameters  
SI 65536  
SF 500.1300132 MHz  
WDW EM  
SSB 0  
LB 0 0.30 Hz  
GB 0  
PC 1.00

7.614  
7.604  
7.599  
7.260  
7.163  
7.147  
7.129  
6.258  
6.252  
6.244  
6.139  
6.133  
6.121  
5.453

4.268  
4.249  
4.224  
3.733  
3.714  
3.226  
3.192  
3.184  
2.984  
2.967  
2.958  
2.341  
2.324  
1.576  
1.559  
1.542  
1.481  
1.462  
1.444

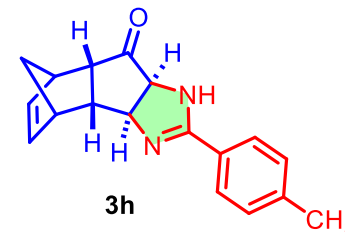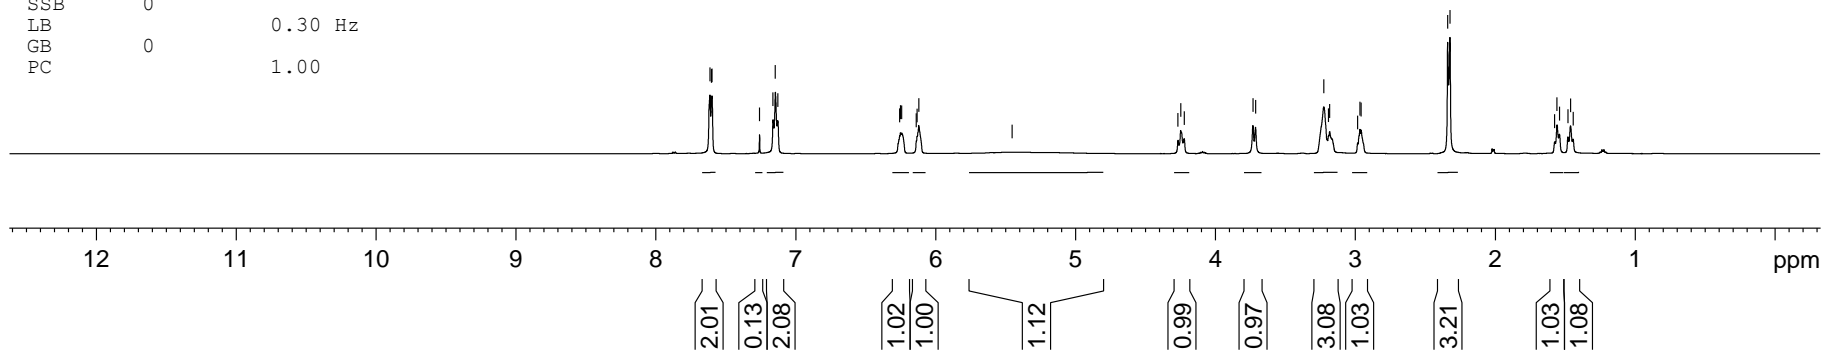

Figure S15. <sup>1</sup>H NMR of compound 3h

INN-SOHAN-II-369-13C

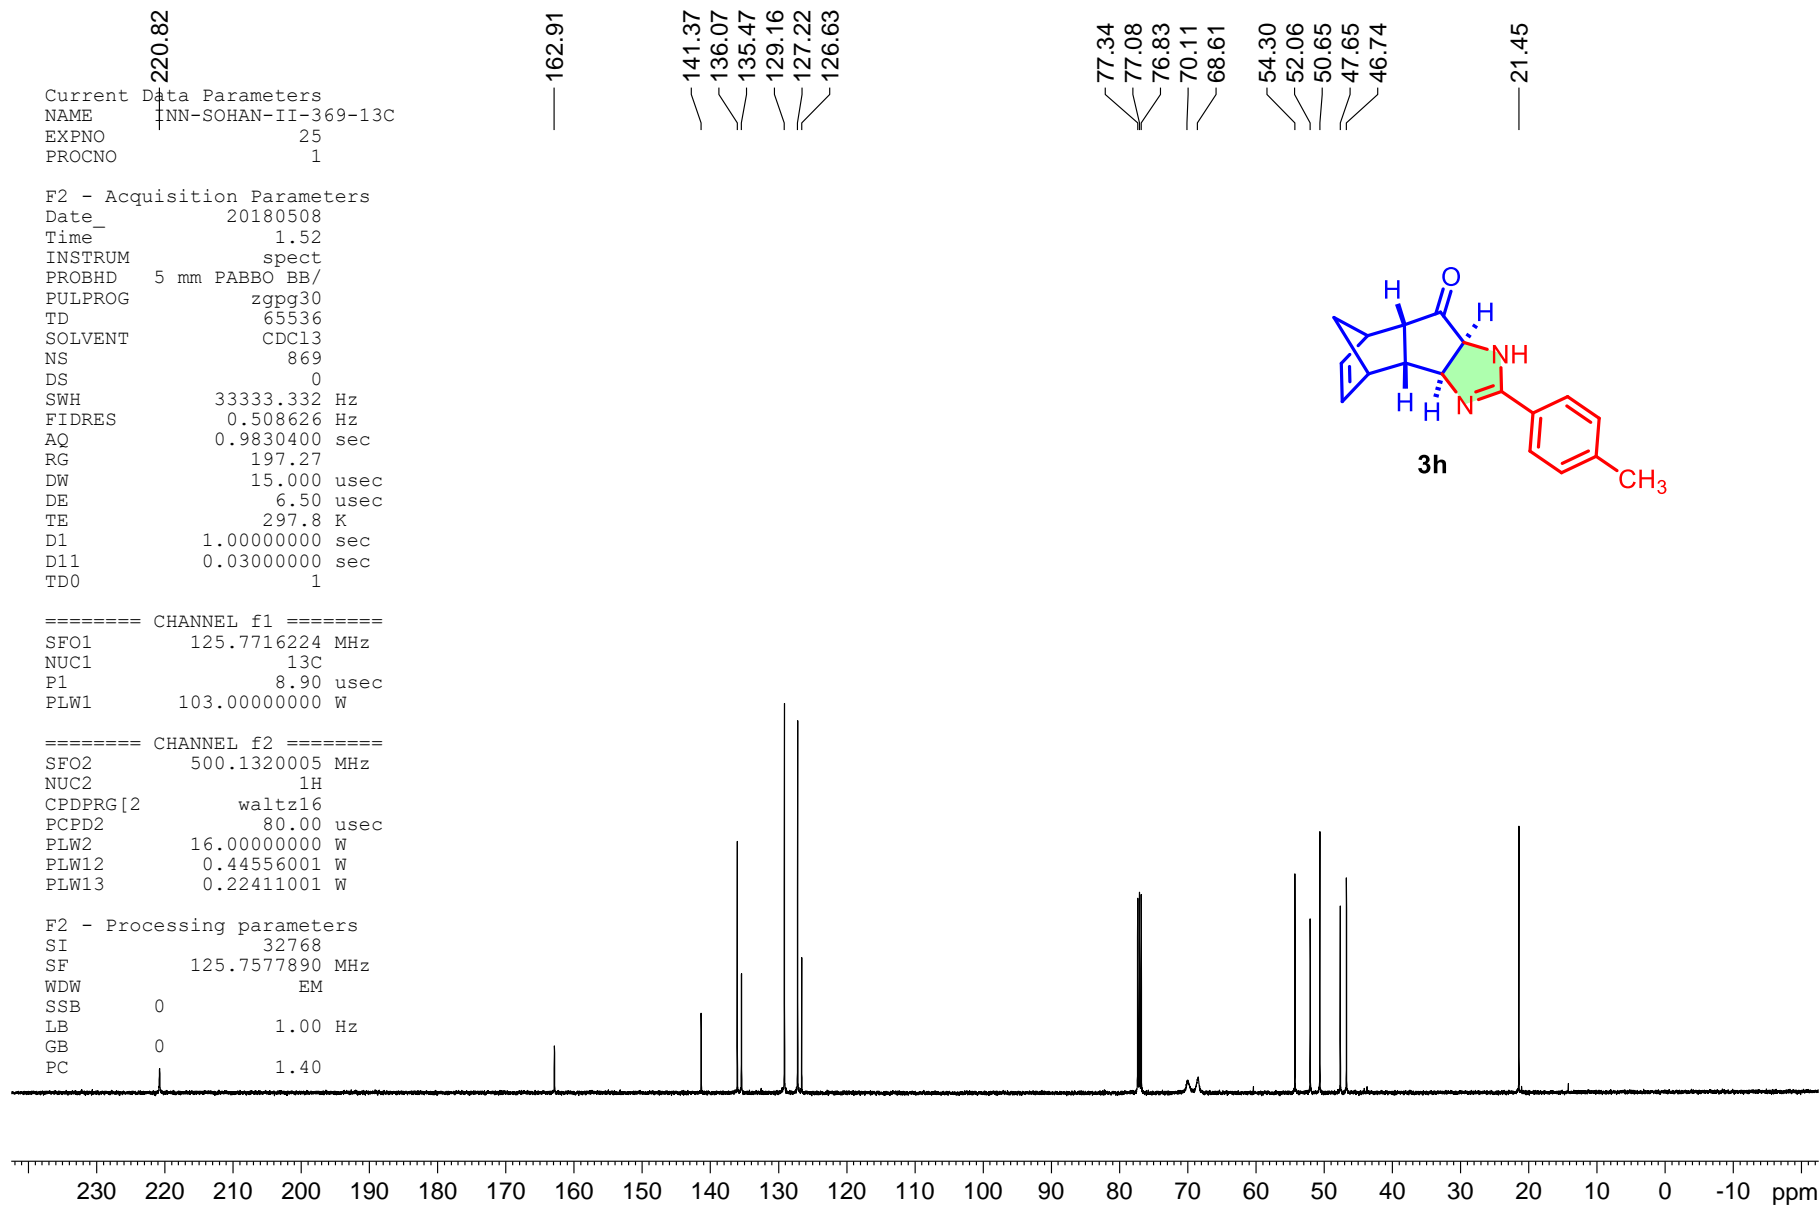

Figure S16. <sup>13</sup>C NMR of compound 3h

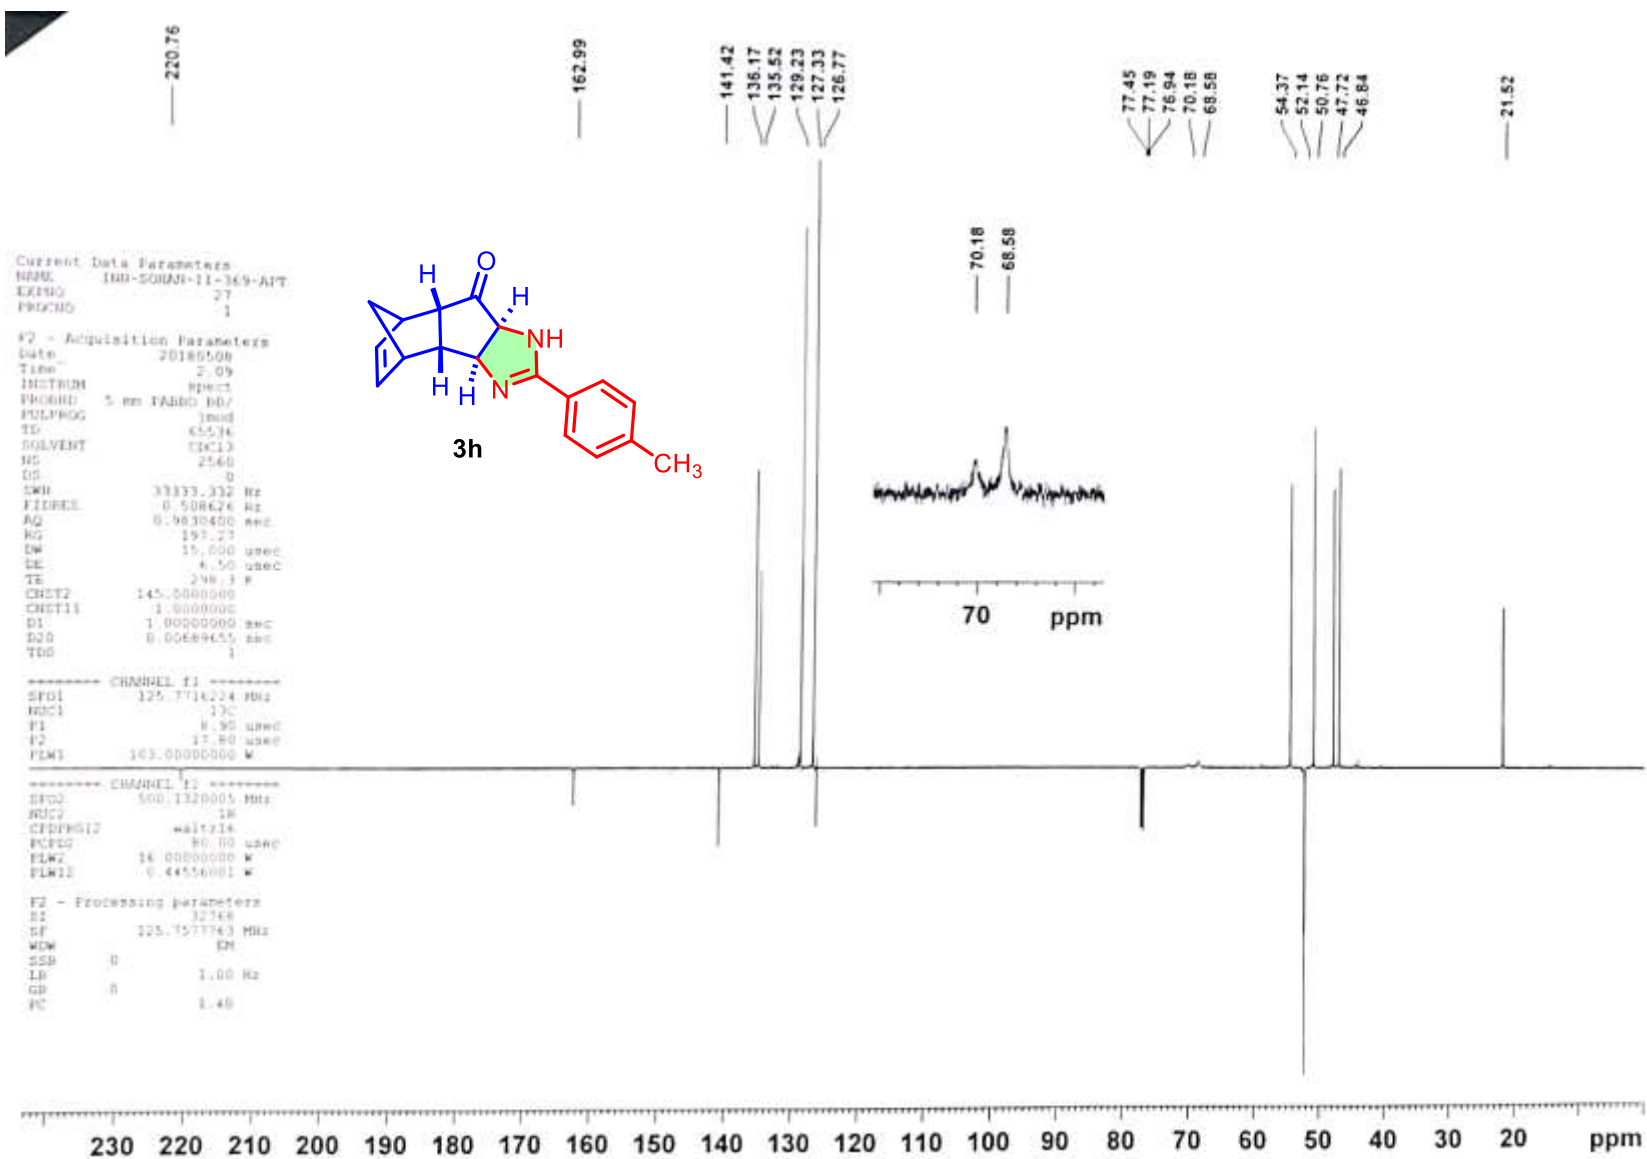

Figure S17.  $^{13}\text{C}$ -APT NMR of compound **3h**

Current Data Parameters  
NAME INH-SORAN-II-369-COSY  
EXPNO 27  
PROCNO 1

F2 - Acquisition Parameters  
Date\_ 20180508  
Time\_ 3.38  
INSTRUM spect  
PROBHD 5 mm F400 Ns/  
PULPROG cosygpcpqf  
TD 2048  
SOLVENT CDC13  
NS 24  
DS 0  
SWH 4302.926 Hz  
FIDRES 2.101038 Hz  
AQ 0.2379776 sec  
RG 106.34  
DN 116.200 usec  
DE 6.50 usec  
TE 299.2 K  
D0 0.0000300 sec  
D1 1.0000000 sec  
D11 0.0300000 sec  
D12 0.0002000 sec  
D13 0.0000400 sec  
D16 0.0002000 sec  
SFO1 500.1323623 MHz

===== CHANNEL f1 =====  
SFO1 500.1323623 MHz  
NUC1 1H  
P0 13.35 usec  
P1 13.35 usec  
P17 2500.00 usec  
PL1 16.00000000 W  
PL10 3.16840005 W

===== GRADIENT CHANNEL =====  
GPRAM[1] SMSQ10.100  
GPS1 10.00 %  
P16 1000.00 usec

F1 - Acquisition parameters  
TD 256  
SFO1 500.1324 MHz  
FIDRES 33.614608 Hz  
SW 8.404 ppm  
FWDGGE QF

F2 - Processing parameters  
SI 1024  
SF 500.1305132 MHz  
WCM QFIME  
SSB 0  
LB 0 Hz  
GB 0  
PC 1.40

F1 - Processing parameters  
SI 1024  
MC2 QF  
SF 500.1305132 MHz  
WCM QFIME  
SSB 0  
LB 0 Hz  
GB 0

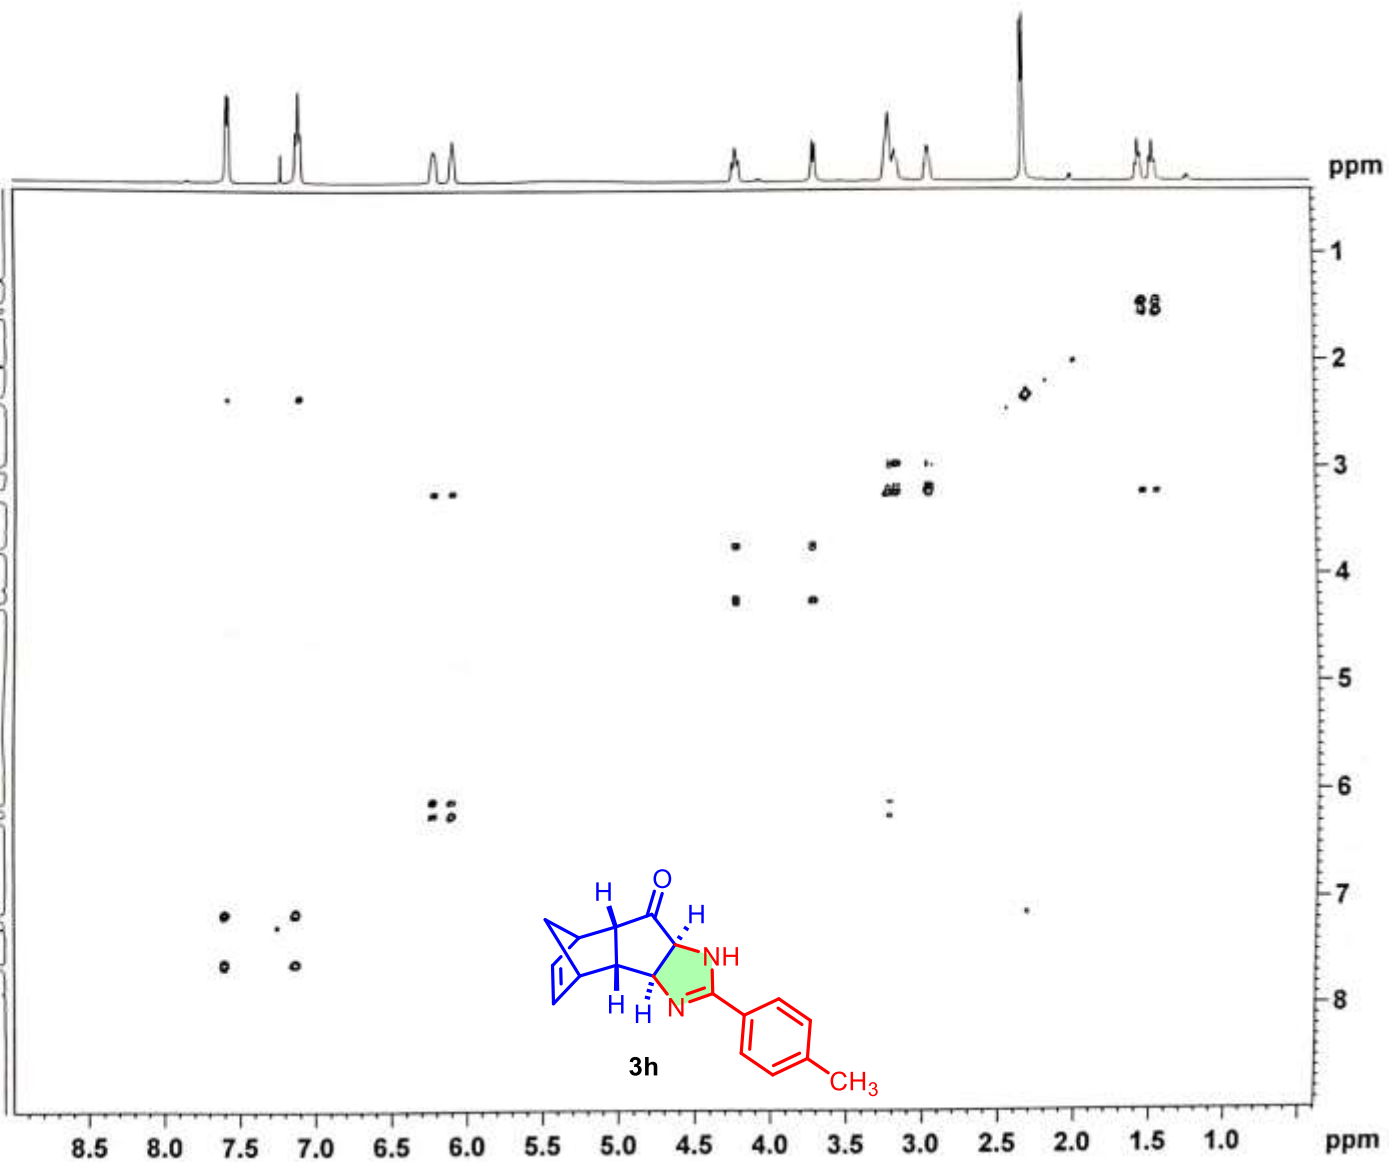

Figure S18. <sup>1</sup>H-<sup>1</sup>H COSY NMR of compound 3h

```

Current Data Parameters
NAME 100-300M-12-249-03Q
EXPNO 1
PROCNO 1
F2 - Acquisition Parameters
Date_ 20180504
Time 3.32
INSTRUM spect
PROBHD 5 mm PABBO 90
PULPROG zgpg30
TD 32768
SOLVENT H2O
AQ 0.10000000
RG 655
DD 0
FIDRES 0.32000000
AQ 0.10000000
RG 655
DD 0
SFO 500.13622 MHz
NUC1 13C
NUC2 1H
PC 12.00
PF 24.70
PT 1000.00
PL1 0.00000000
===== CHANNEL f1 =====
SFO 500.13622 MHz
NUC1 13C
CPDPRG2 h1_gwagp_3g_2
P1 0.00
P14 500.00
P18 2000.00
P43 1500.00
PLND 0
PLRG 10, 0.00000000
PLM2 1.00000000
SFOA01 Csp40, 4.3, 20.1
SFOA02 0.300
SFOA03 0.00
SFOA04 12.00000000
SFOA05 Csp3, 0.0, 0.500
SFOA06 0.00
SFOA07 10.00000000
SFOA08 Csp3, 1.5, 20.2
SFOA09 0.300
SFOA10 5.00000000
SFOA11 Csp3, 1.5, 20.2
SFOA12 0.500
SFOA13 0.00
SFOA14 3.00000000
===== GRADIENT CHANNEL =====
SFOG01 0.00
SFOG02 0.00
SFOG03 0.00
SFOG04 0.00
SFOG05 0.00
SFOG06 0.00
SFOG07 0.00
SFOG08 0.00
SFOG09 0.00
SFOG10 0.00
SFOG11 0.00
SFOG12 0.00
SFOG13 0.00
SFOG14 0.00
SFOG15 0.00
F1 - Acquisition parameters
TD 32768
SFO 500.13622 MHz
FIDRES 0.32000000
AQ 0.10000000
RG 655
DD 0
SFO 500.13622 MHz
NUC1 13C
NUC2 1H
PC 12.00
PF 24.70
PT 1000.00
PL1 0.00000000
===== CHANNEL f2 =====
SFO 125.76140 MHz
NUC1 13C
CPDPRG2 h1_gwagp_3g_2
P1 0.00
P14 500.00
P18 2000.00
P43 1500.00
PLND 0
PLRG 10, 0.00000000
PLM2 1.00000000
SFOA01 Csp40, 4.3, 20.1
SFOA02 0.300
SFOA03 0.00
SFOA04 12.00000000
SFOA05 Csp3, 0.0, 0.500
SFOA06 0.00
SFOA07 10.00000000
SFOA08 Csp3, 1.5, 20.2
SFOA09 0.300
SFOA10 5.00000000
SFOA11 Csp3, 1.5, 20.2
SFOA12 0.500
SFOA13 0.00
SFOA14 3.00000000
===== GRADIENT CHANNEL =====
SFOG01 0.00
SFOG02 0.00
SFOG03 0.00
SFOG04 0.00
SFOG05 0.00
SFOG06 0.00
SFOG07 0.00
SFOG08 0.00
SFOG09 0.00
SFOG10 0.00
SFOG11 0.00
SFOG12 0.00
SFOG13 0.00
SFOG14 0.00
SFOG15 0.00
F2 - Processing parameters
SI 32768
SF 500.13622 MHz
WDW EM
SSB 0
LB 0
GB 0
PC 1.00
F3 - Processing parameters
SI 32768
SF 125.76140 MHz
WDW EM
SSB 0
LB 0
GB 0
PC 1.00

```

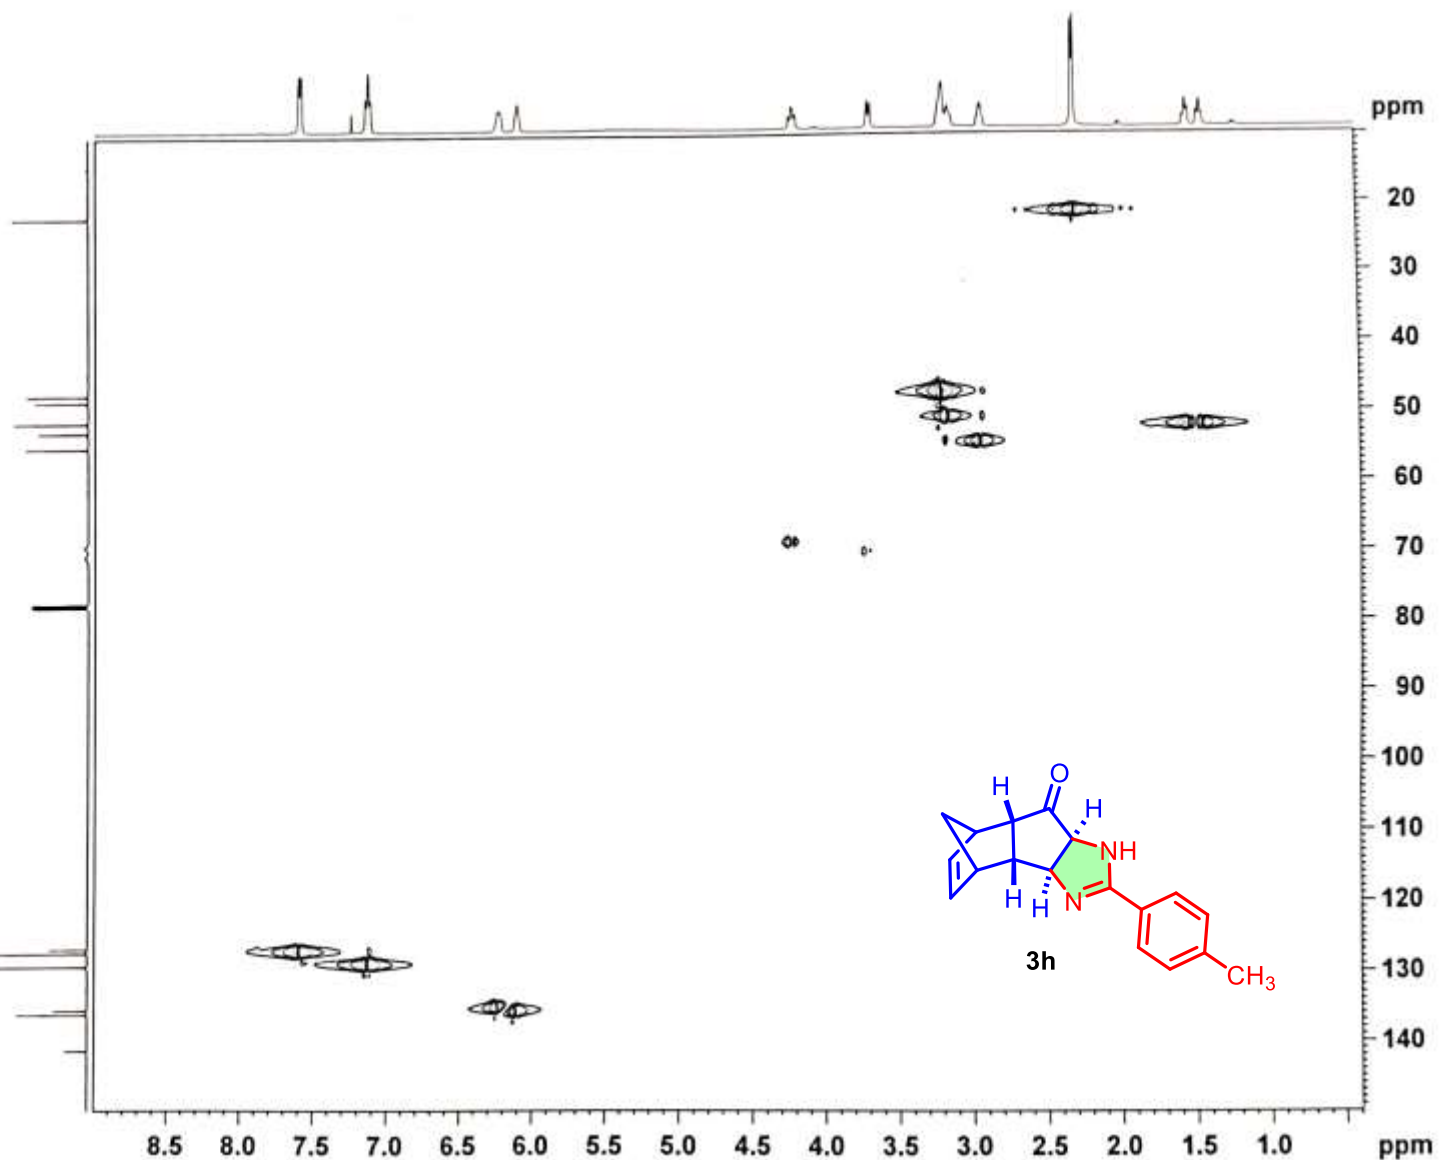

Figure S19. <sup>1</sup>H-<sup>13</sup>C HSQC NMR of compound 3h

INN-SOHAN-II-189C-1H

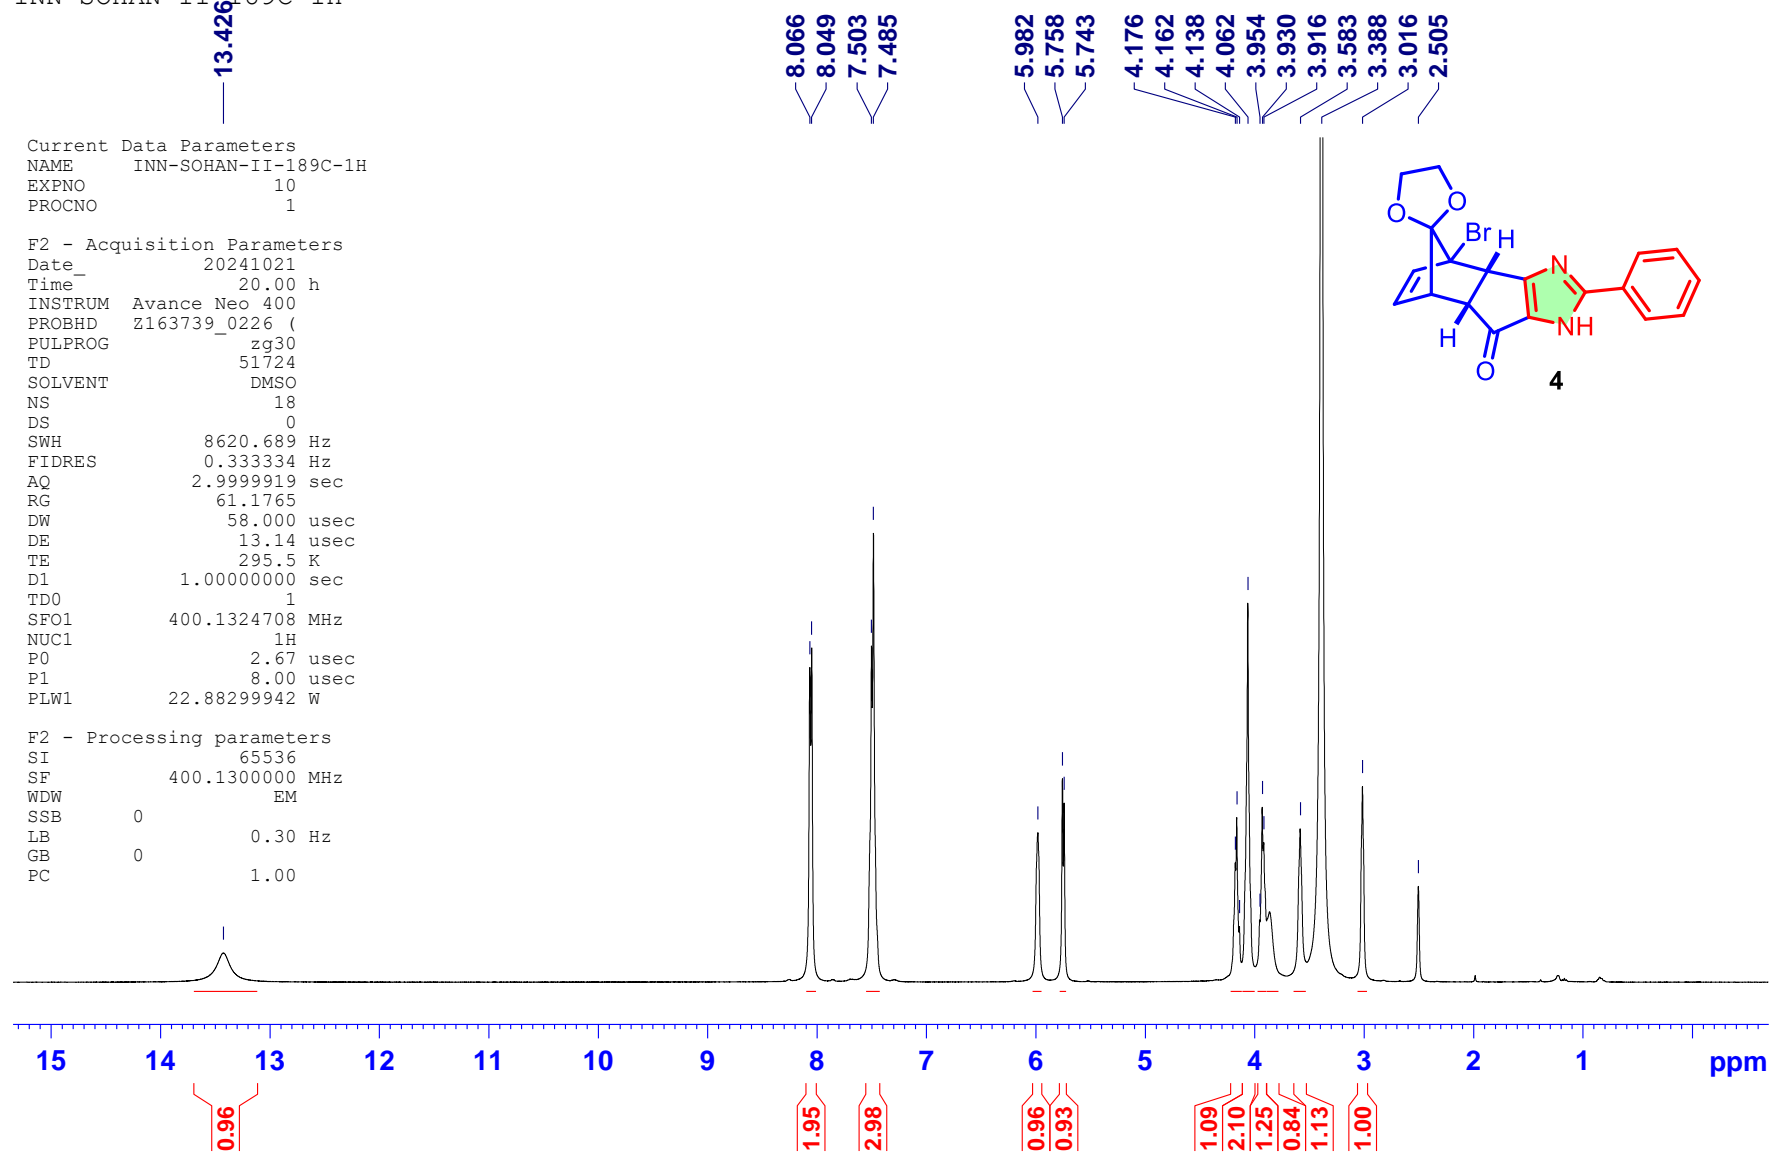

Figure S20. <sup>1</sup>H NMR of compound 4



INN-TGL-04-56-APT

Current Data Parameters  
NAME INN-TGL-04-56-APT  
EXPNO 13  
PROCNO 1

F2 - Acquisition Parameters  
Date\_ 20260130  
Time\_ 9.25 h  
INSTRUM Avance Neo 400  
PROBHD Z163739\_0226 (  
PULPROG jmod  
TD 65536  
SOLVENT DMSO  
NS 14284  
DS 0  
SWH 27777.778 Hz  
FIDRES 0.847710 Hz  
AQ 1.1796480 sec  
RG 101  
DW 18.000 usec  
DE 6.50 usec  
TE 296.6 K  
CNST2 145.0000000  
CNST11 1.0000000  
D1 1.00000000 sec  
D20 0.00689655 sec  
TD0 1  
SFO1 100.6242384 MHz  
NUC1 13C  
P1 8.00 usec  
P2 16.00 usec  
PLW1 97.00000000 W  
SFO2 400.1316005 MHz  
NUC2 1H  
CPDPRG[2] waltz65  
PCPD2 90.00 usec  
PLW2 25.07999992 W  
PLW12 0.19815999 W

F2 - Processing parameters  
SI 32768  
SF 100.6127906 MHz  
WDW EM  
SSB 0  
LB 1.00 Hz  
GB 0  
PC 1.40

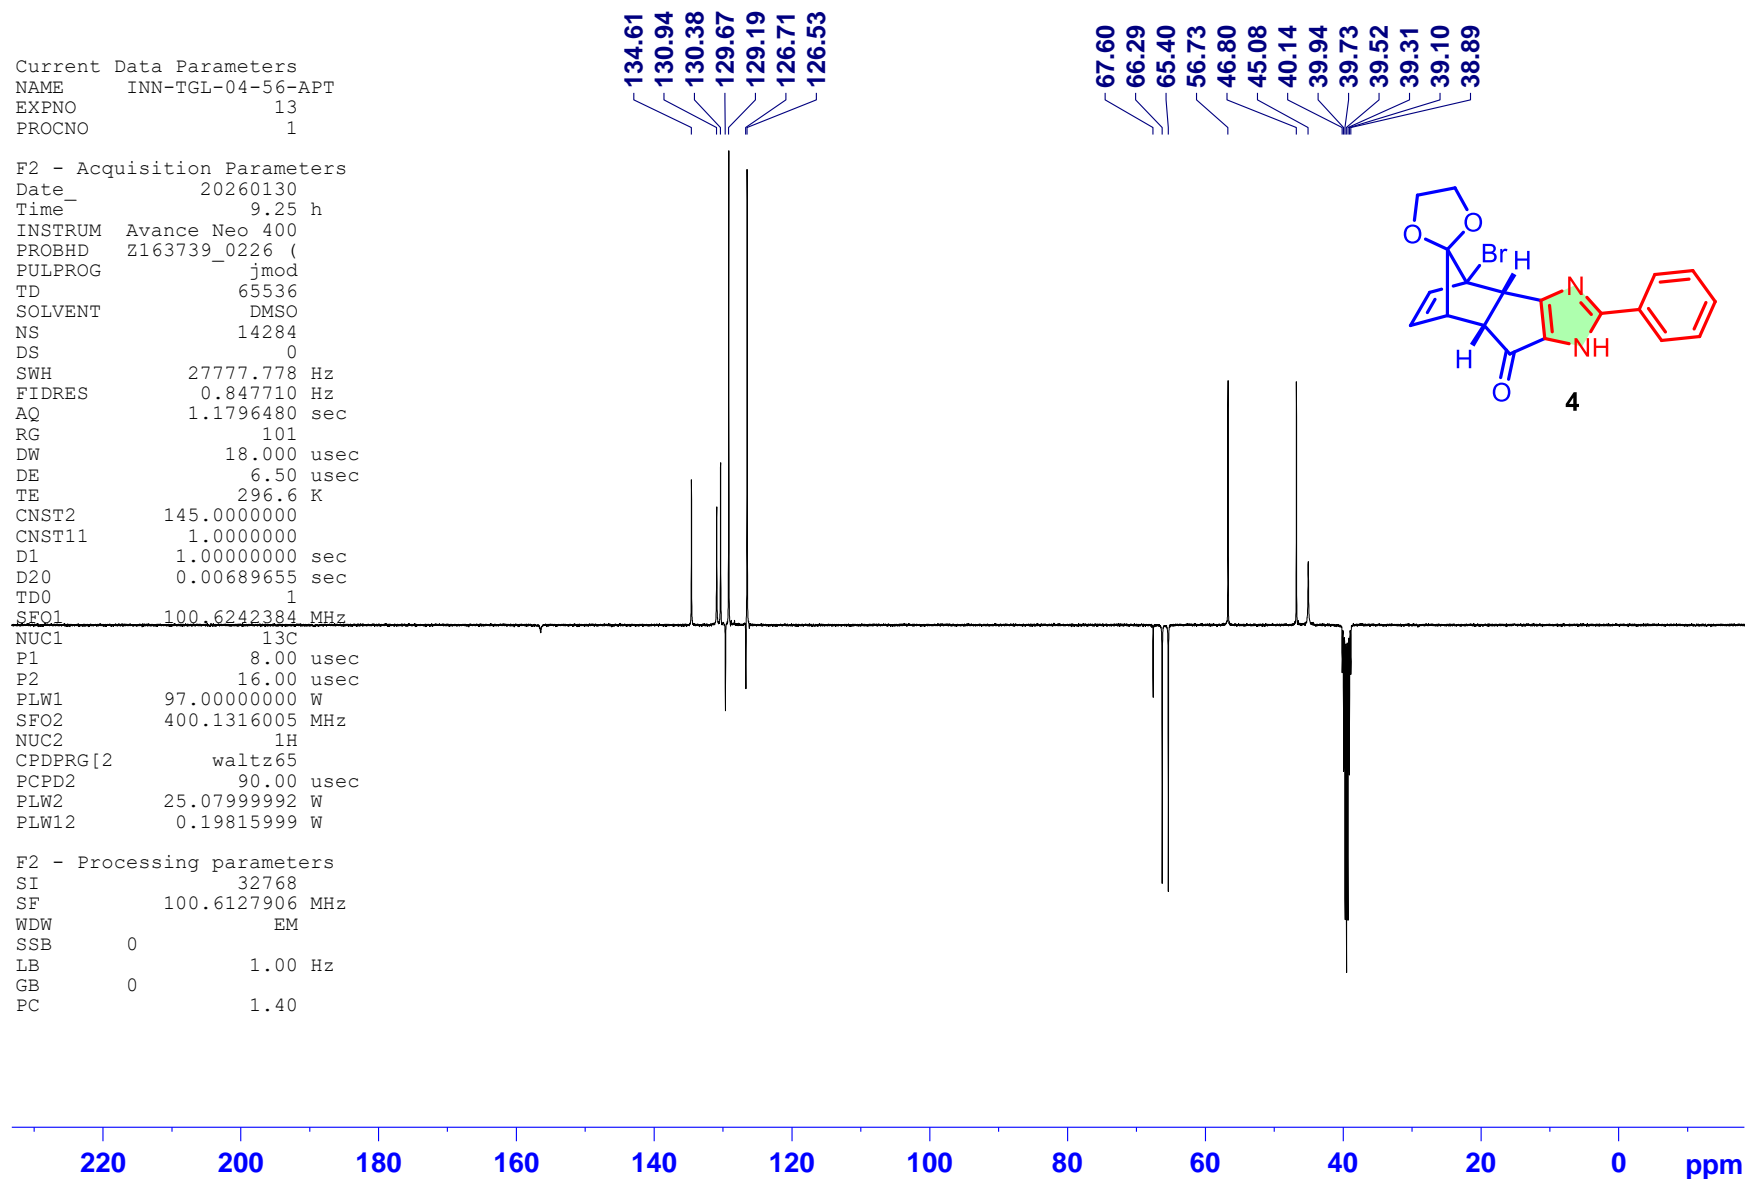

Figure S22. <sup>13</sup>C-APT NMR of compound 4

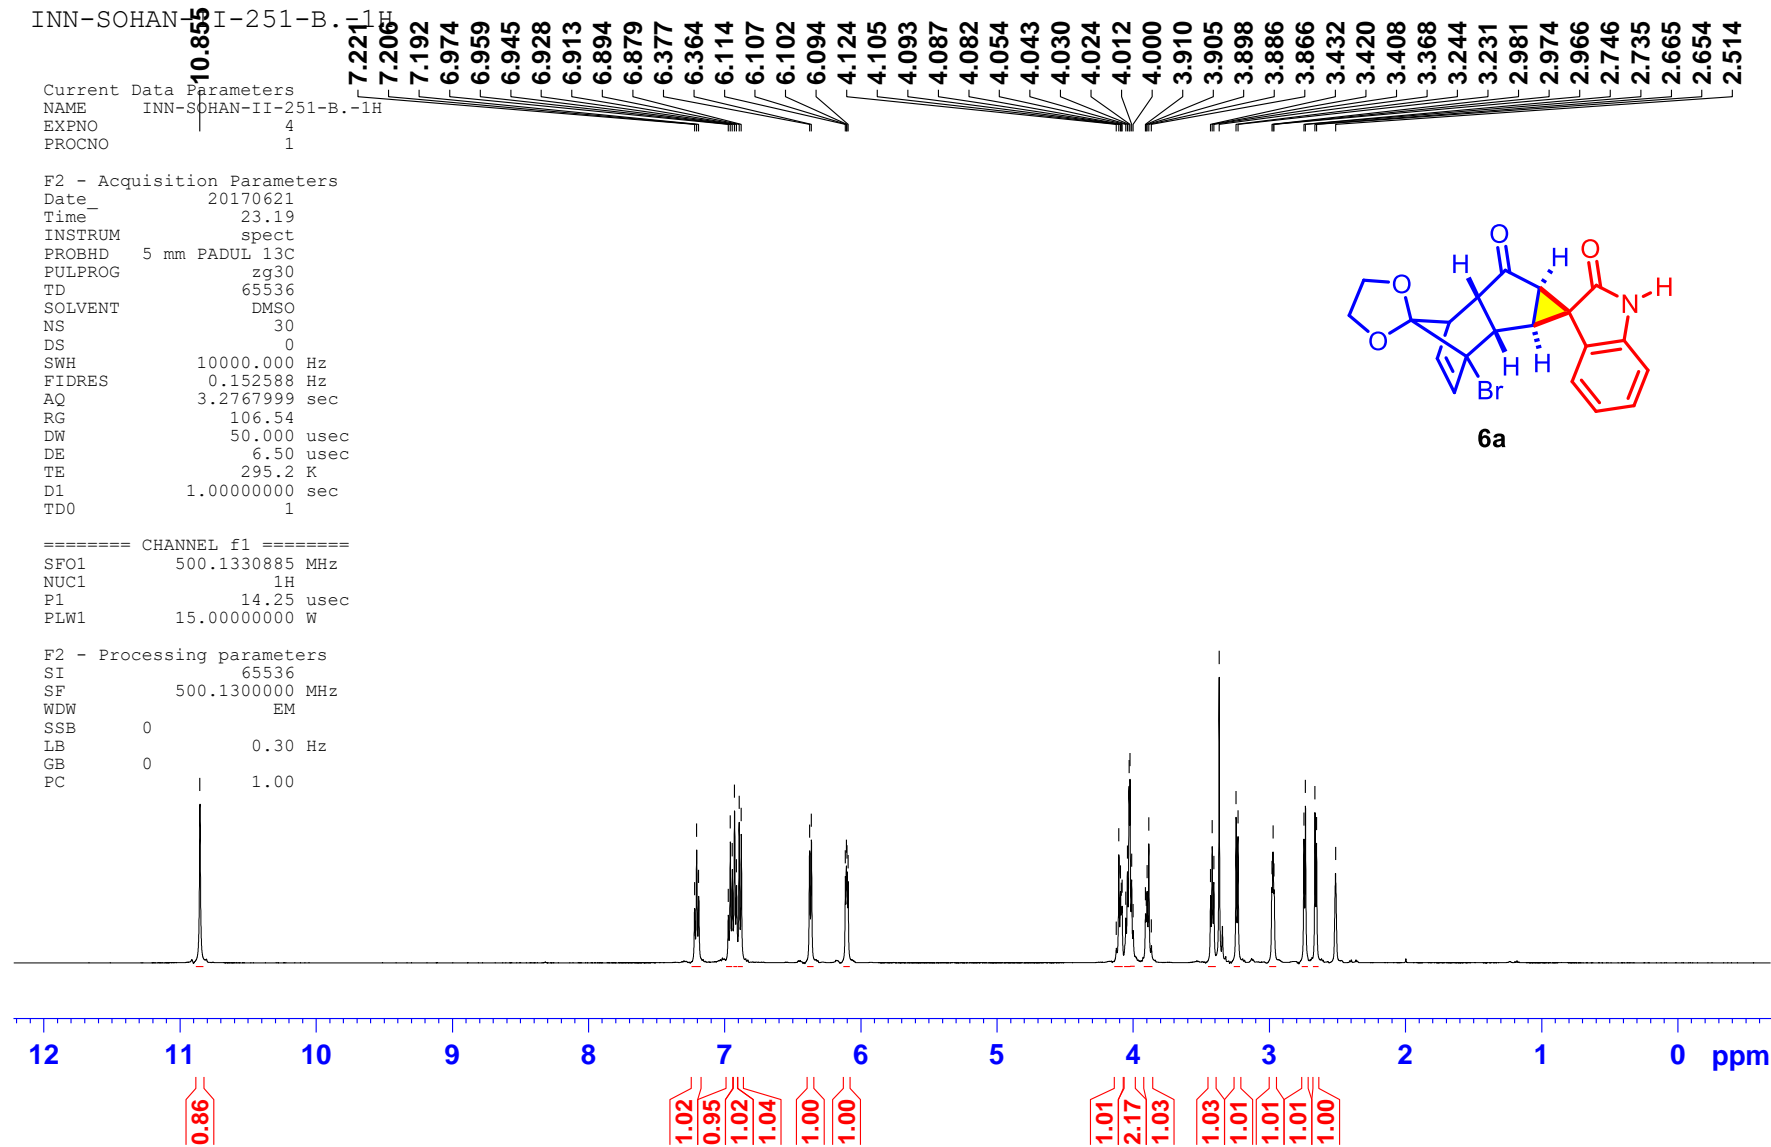

Figure S23. <sup>1</sup>H NMR of compound **6a**

INN-SOHAN-II-251-B-13C

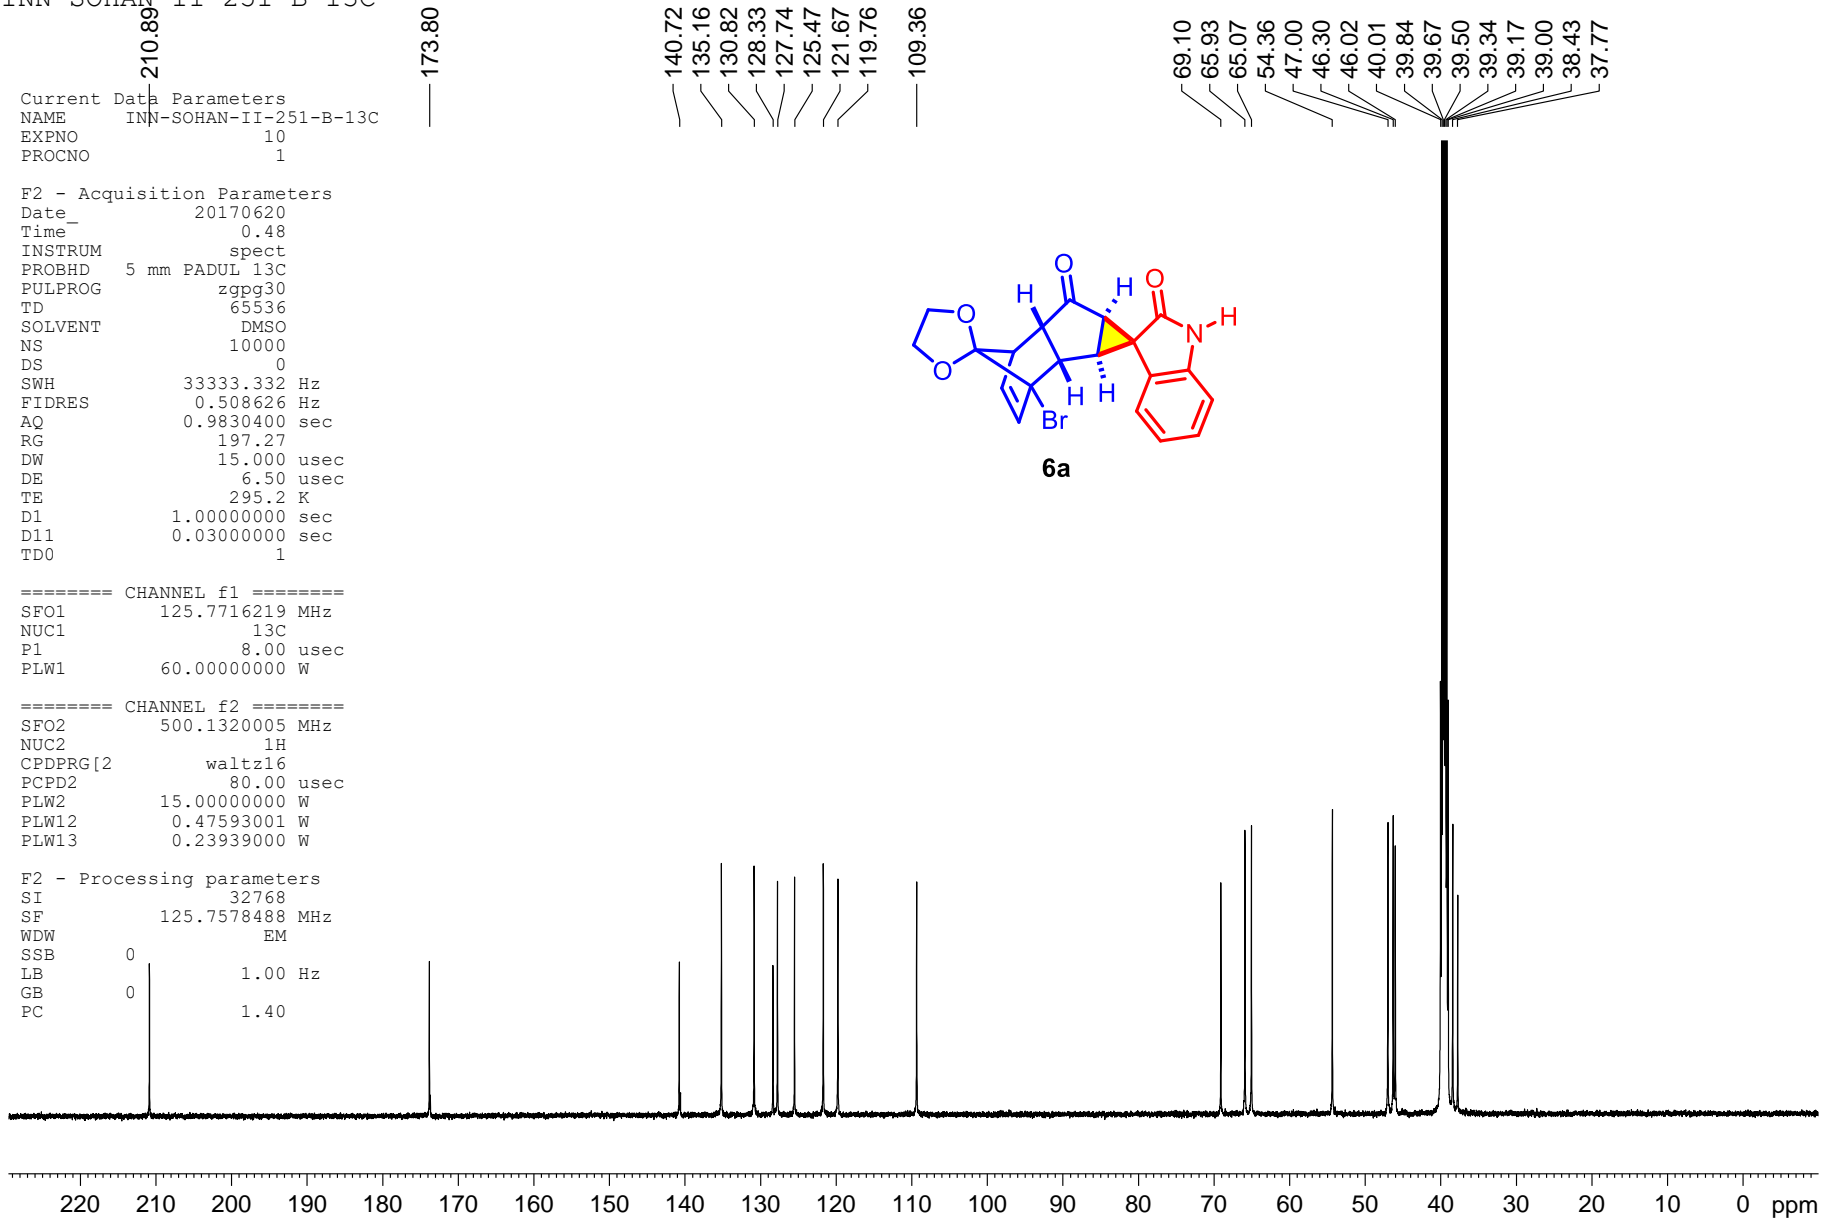

Figure S24. <sup>13</sup>C NMR of compound 6a

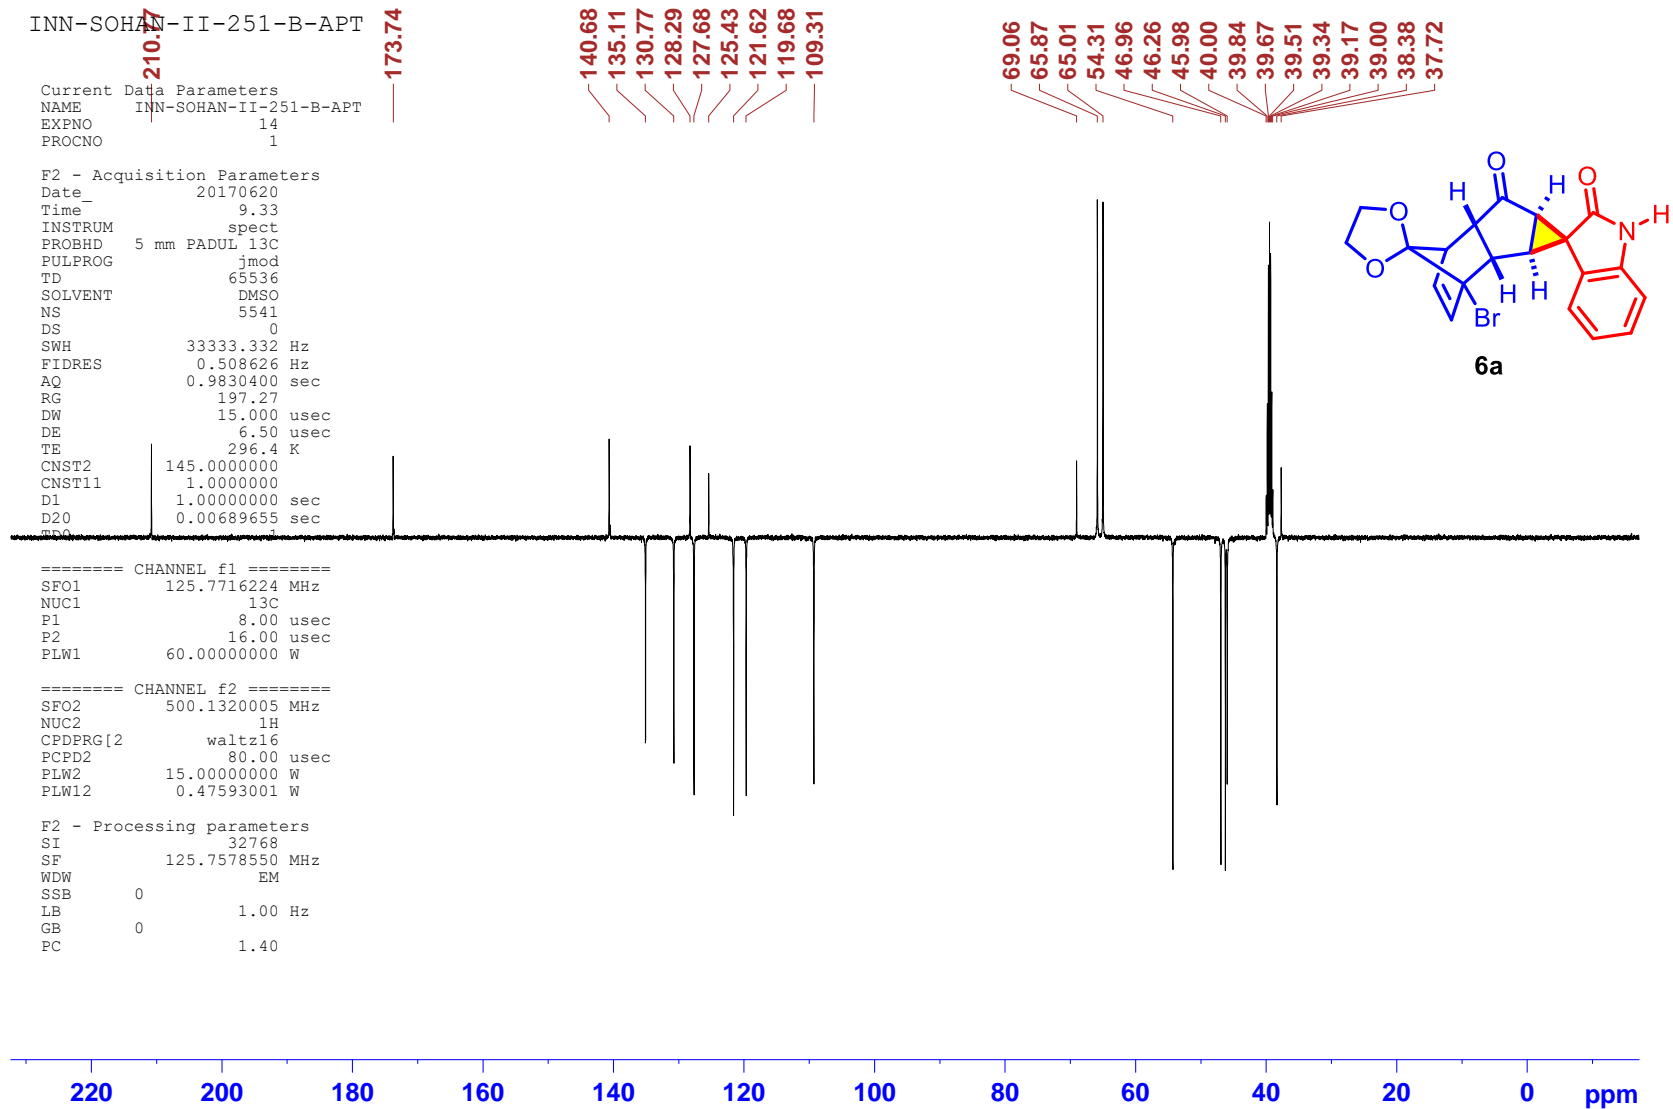

Figure S25. <sup>13</sup>C-APT NMR of compound 6a

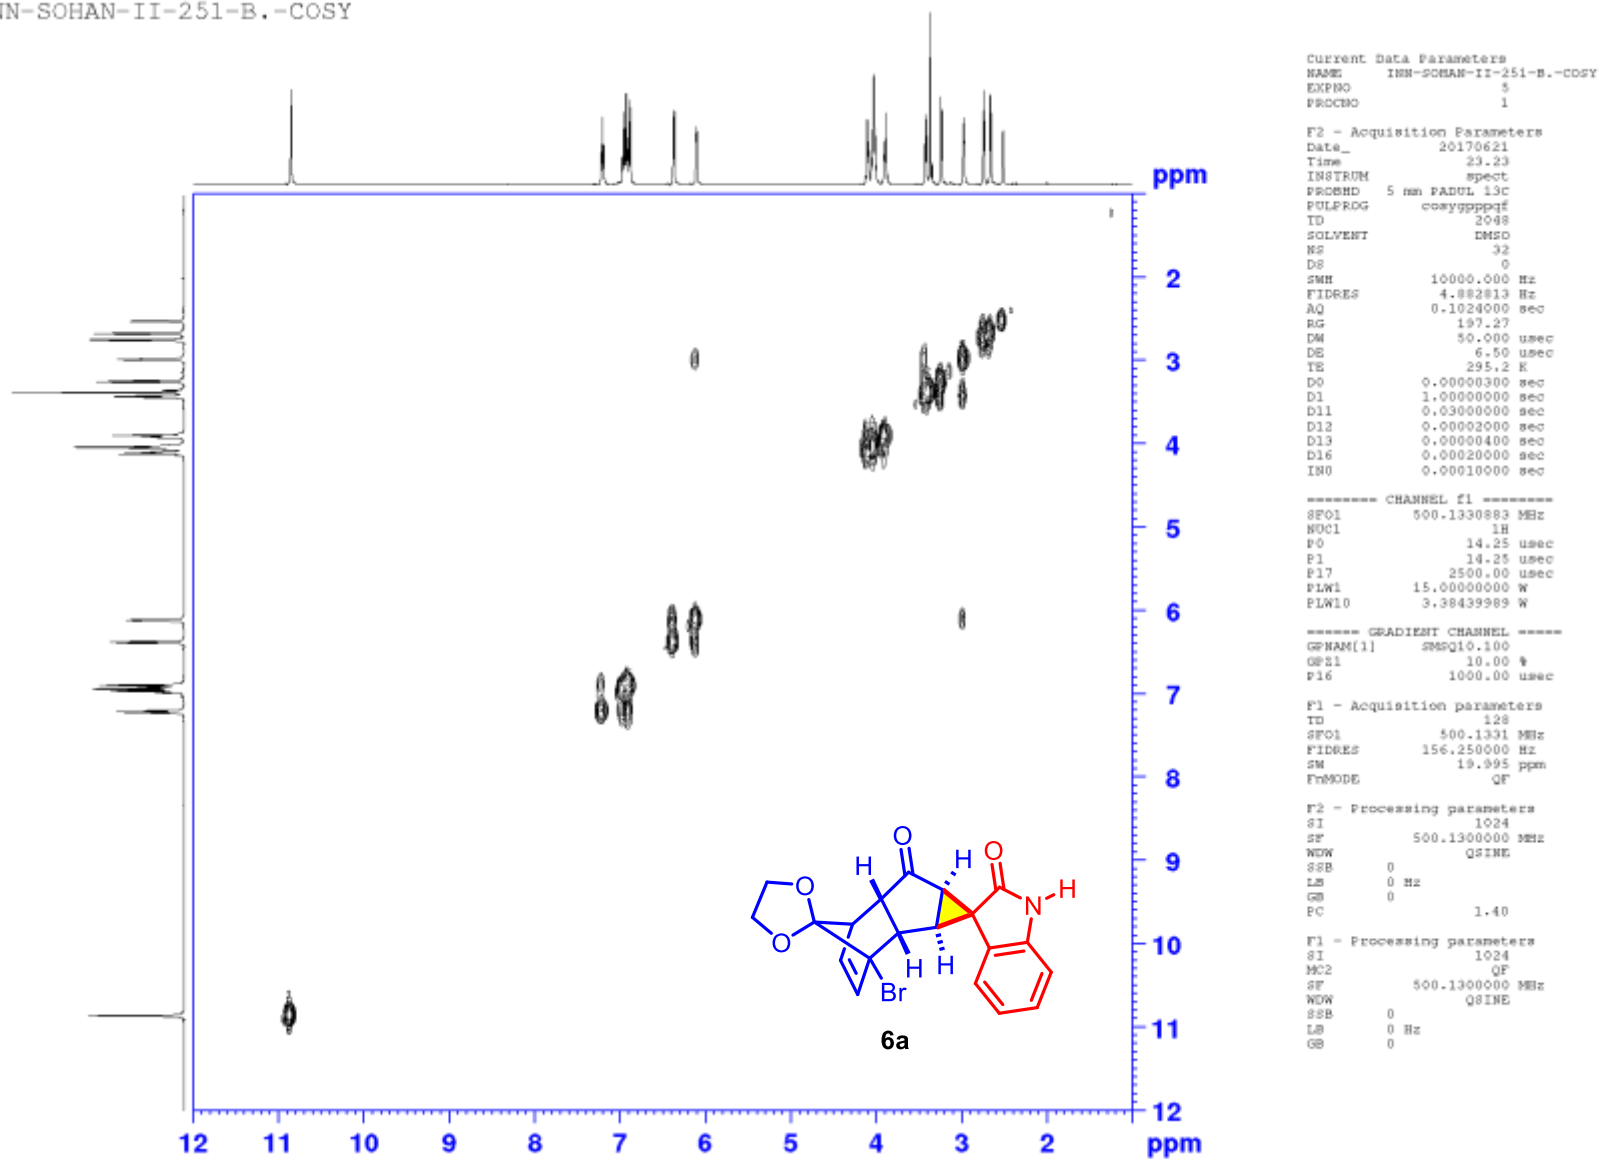Figure S26.  $^1\text{H}$ - $^1\text{H}$  COSY NMR of compound 6a

INN-SOHAN-II-251-B.-COSY

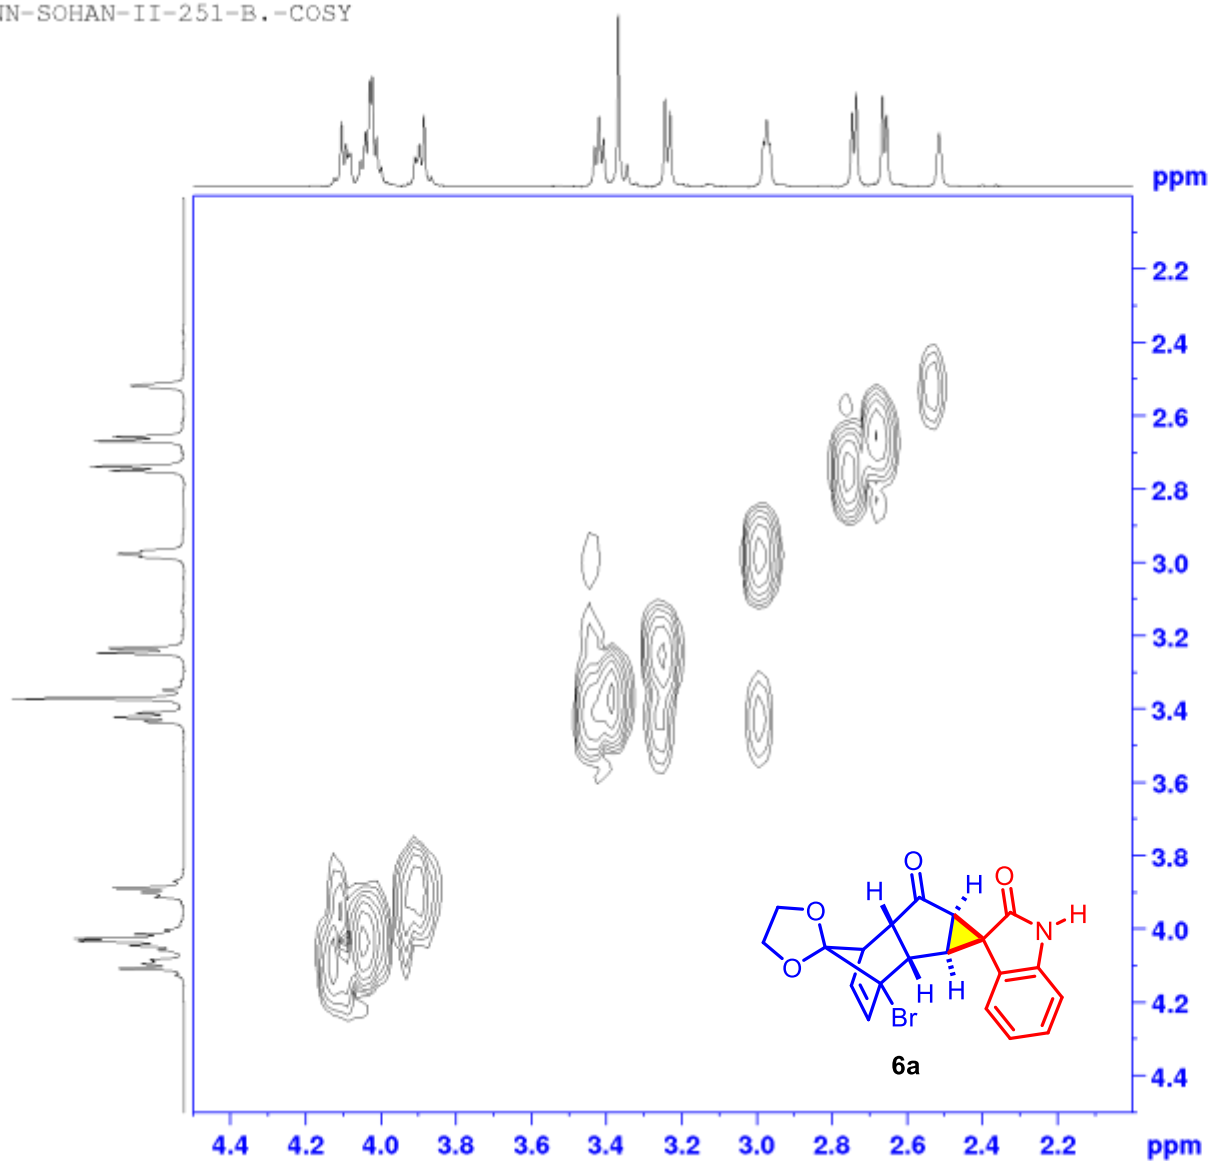

Current Data Parameters  
 NAME INN-SOHAN-II-251-B.-COSY  
 EXPNO 5  
 PROCNO 1

F2 - Acquisition Parameters  
 Date\_ 20170621  
 Time 23.23  
 INSTRUM spect  
 PROCNO 5 mm PADUL 13C  
 PULPROG cosygppppqf  
 ID 2048  
 SOLVENT DMSO  
 NS 32  
 DS 0  
 SMN 10000.000 Hz  
 FIDRES 4.882813 Hz  
 AQ 0.1024000 sec  
 RG 197.27  
 DM 50.000 usec  
 DE 6.50 usec  
 TE 295.2 K  
 DO 0.00000300 sec  
 D1 1.00000000 sec  
 D11 0.03000000 sec  
 D12 0.00000000 sec  
 D13 0.00000400 sec  
 D16 0.00020000 sec  
 INO 0.00010000 sec

----- CHANNEL f1 -----  
 SFO1 500.1330883 MHz  
 NUCL1 1H  
 P0 14.25 usec  
 P1 14.25 usec  
 P17 2500.00 usec  
 PLW1 15.00000000 W  
 PLW10 3.38439989 W

----- GRADIENT CHANNEL -----  
 GPMAX[1] SMSQ10.100  
 GPC1 10.00 %  
 P16 1000.00 usec

F1 - Acquisition parameters  
 TD 128  
 SFO1 500.1331 MHz  
 FIDRES 156.250000 Hz  
 SW 19.995 ppm  
 FMODE QF

F2 - Processing parameters  
 SI 1024  
 SF 500.1300000 MHz  
 WDW QSINE  
 SSB 0  
 LB 0 Hz  
 GB 0  
 PC 1.40

F1 - Processing parameters  
 SI 1024  
 MC2 QF  
 SF 500.1300000 MHz  
 WDW QSINE  
 SSB 0  
 LB 0 Hz  
 GB 0

Figure S26a. Expansion of <sup>1</sup>H-<sup>1</sup>H COSY NMR of compound 6a









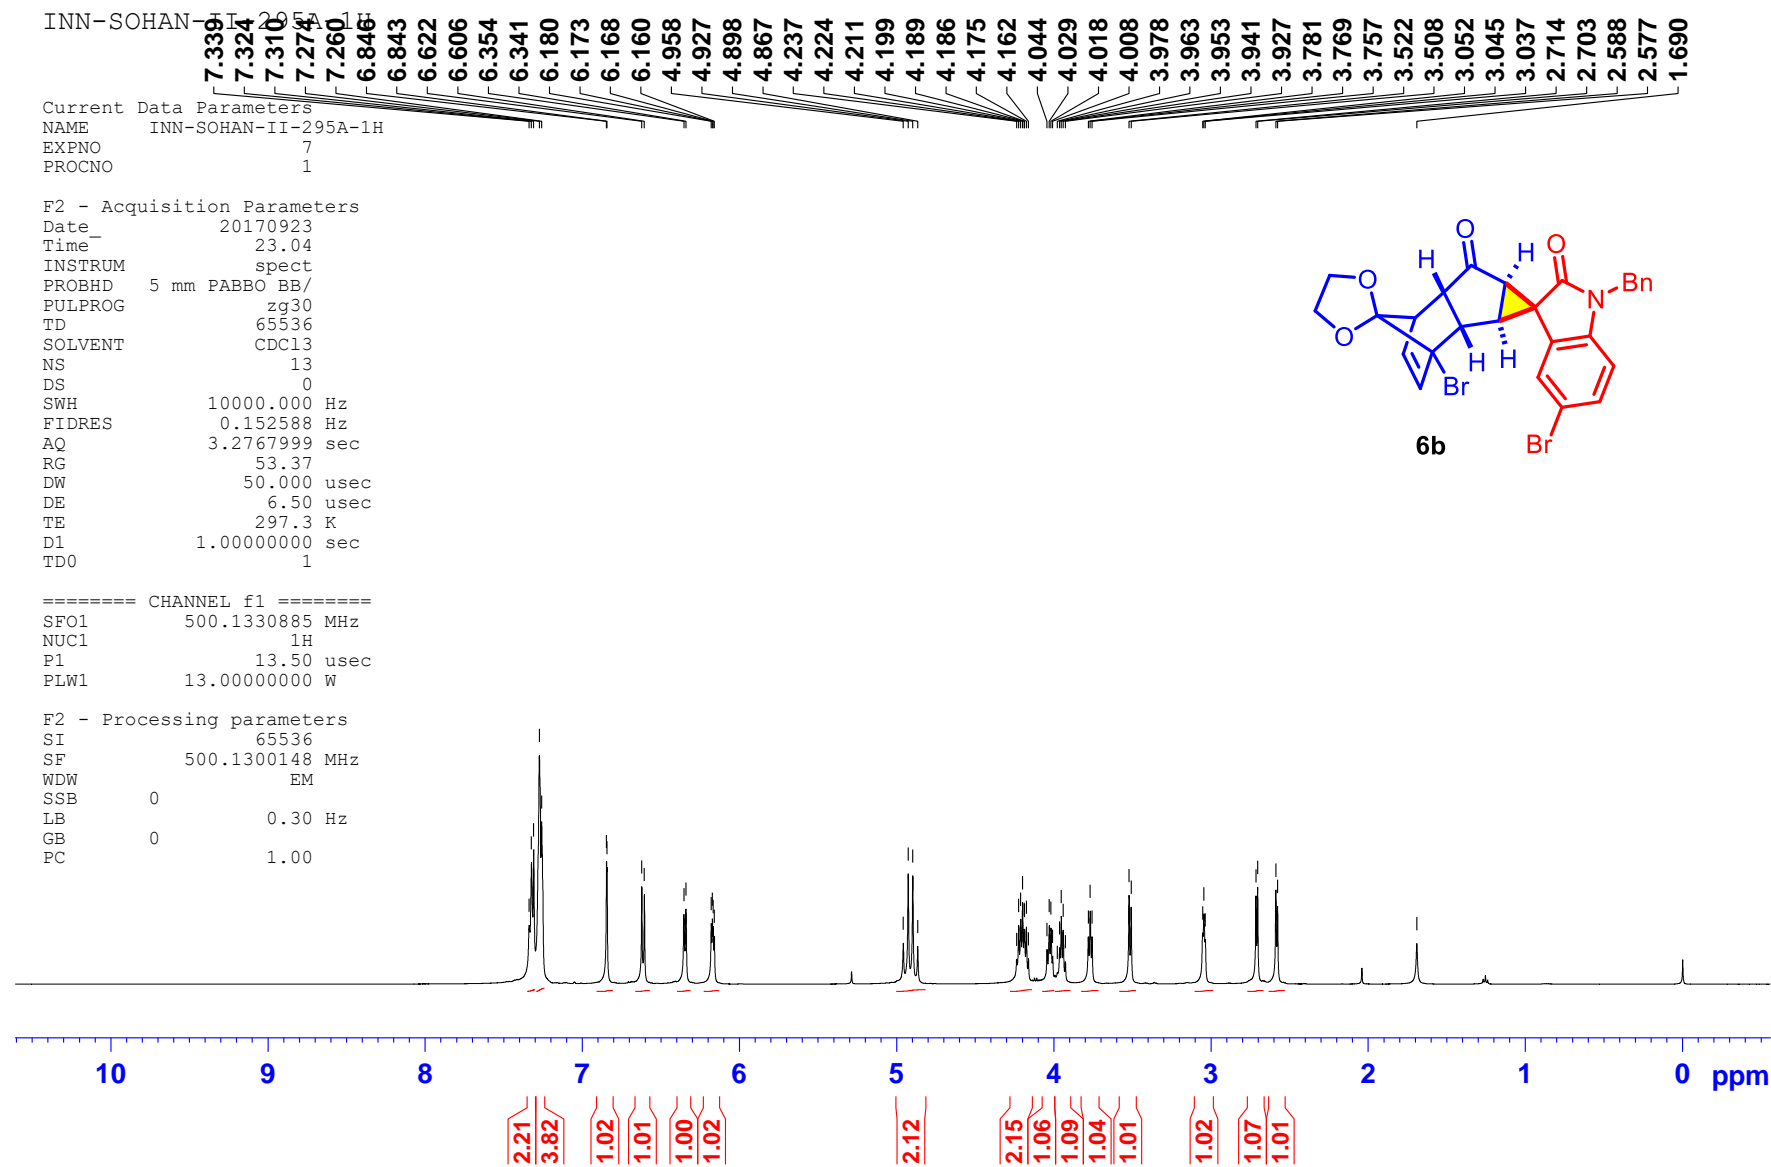

Figure S28. <sup>1</sup>H NMR of compound **6b**

INN-SOHAN-II-295A-13C

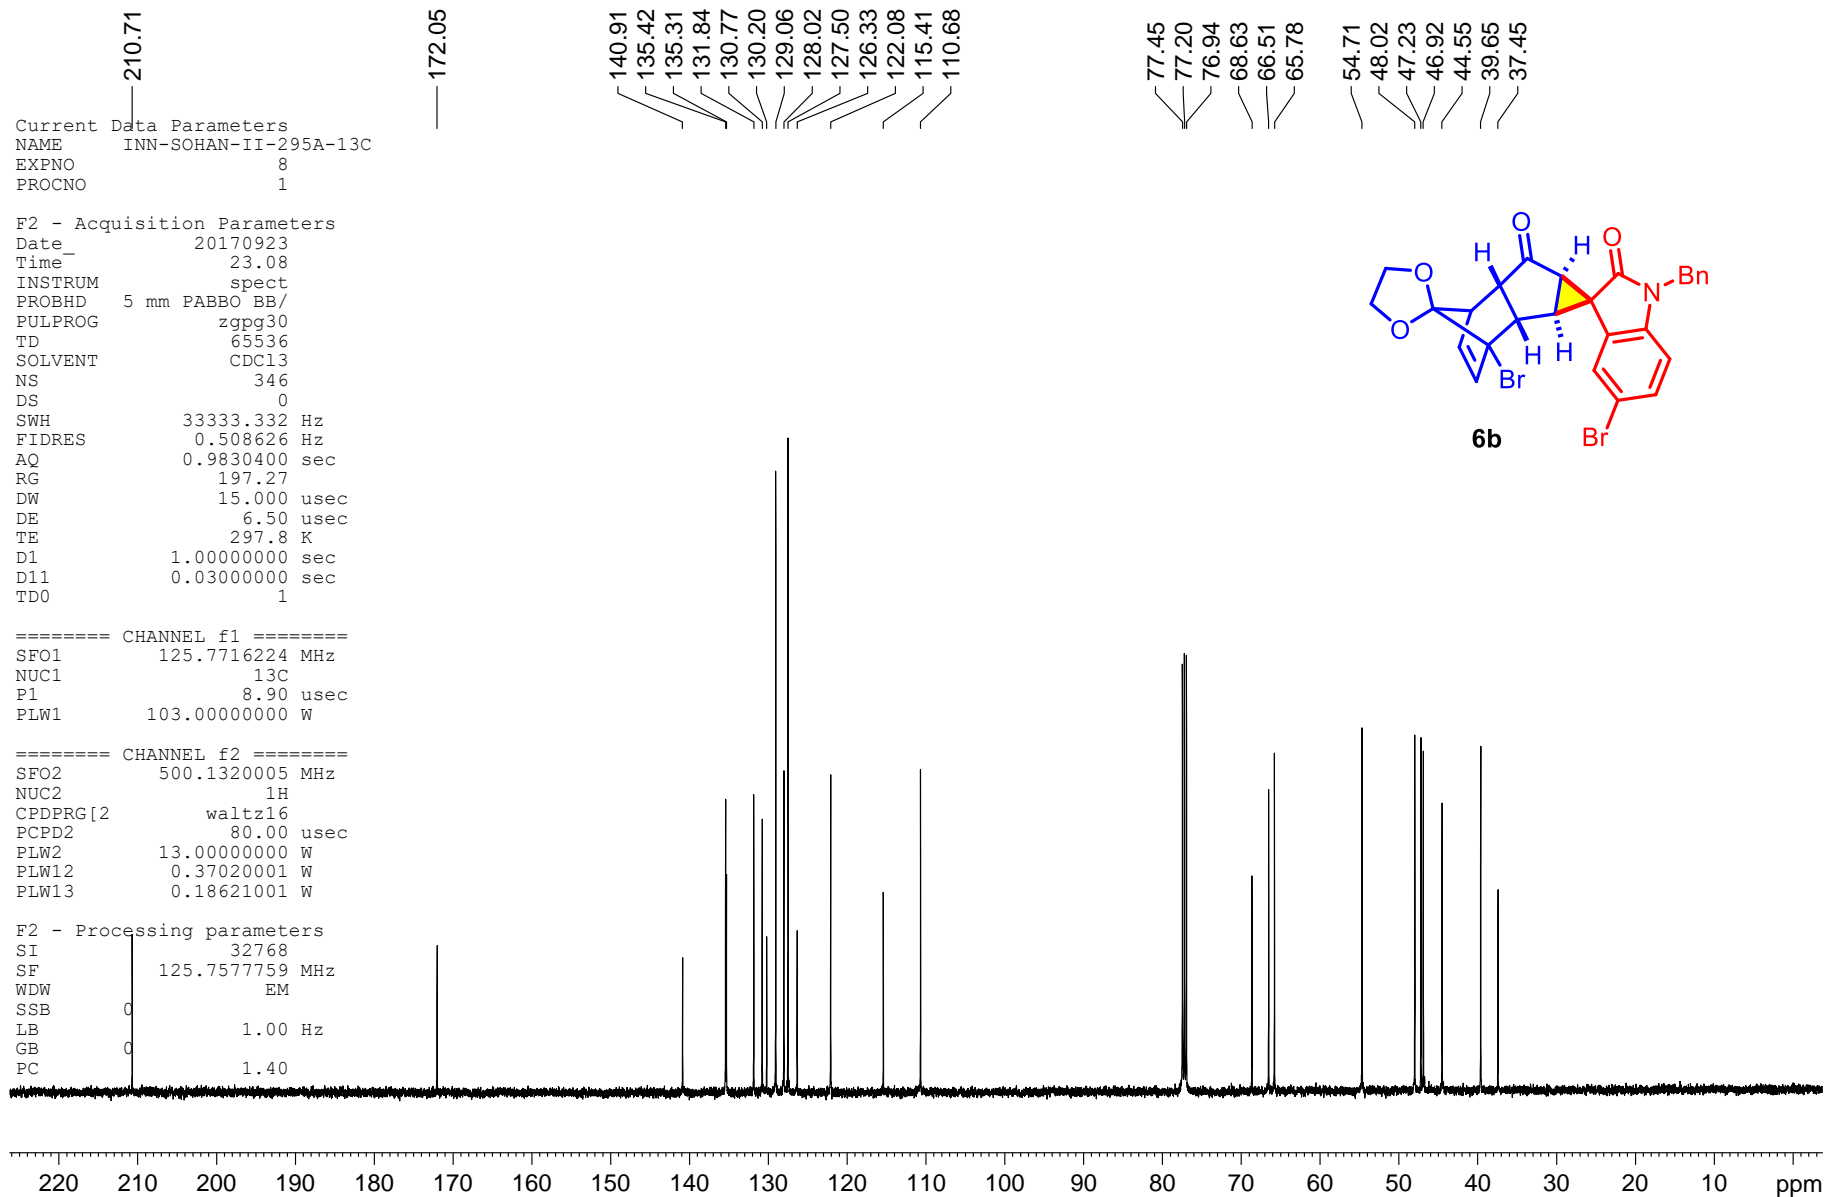

Figure S29. <sup>13</sup>C NMR of compound **6b**

INN-SOHAN-II-295A-APT

Current Data Parameters  
NAME INN-SOHAN-II-295A-APT  
EXPNO 9  
PROCNO 1

F2 - Acquisition Parameters  
Date\_ 20170923  
Time\_ 23.22  
INSTRUM spect  
PROBHD 5 mm PABBO BB/  
PULPROG jmod  
TD 65536  
SOLVENT CDC13  
NS 215  
DS 0  
SWH 33333.332 Hz  
FIDRES 0.508626 Hz  
AQ 0.9830400 sec  
RG 197.27  
DW 15.000 usec  
DE 6.50 usec  
TE 298.0 K  
CNST2 145.0000000  
CNST11 1.0000000  
D1 1.00000000 sec  
D20 0.00689655 sec  
TD0 1

==== CHANNEL f1 =====  
SFO1 125.7716224 MHz  
NUC1 13C  
P2 17.80 usec  
PLW1 103.00000000 W  
  
==== CHANNEL f2 =====  
SFO2 500.1320005 MHz  
NUC2 1H  
CPDPRG[2] waltz16  
PCPD2 80.00 usec  
PLW2 13.00000000 W  
PLW12 0.37020001 W

F2 - Processing parameters  
SI 32768  
SF 125.7577758 MHz  
WDW EM  
SSB 0  
LB 1.00 Hz  
GB 0  
PC 1.40

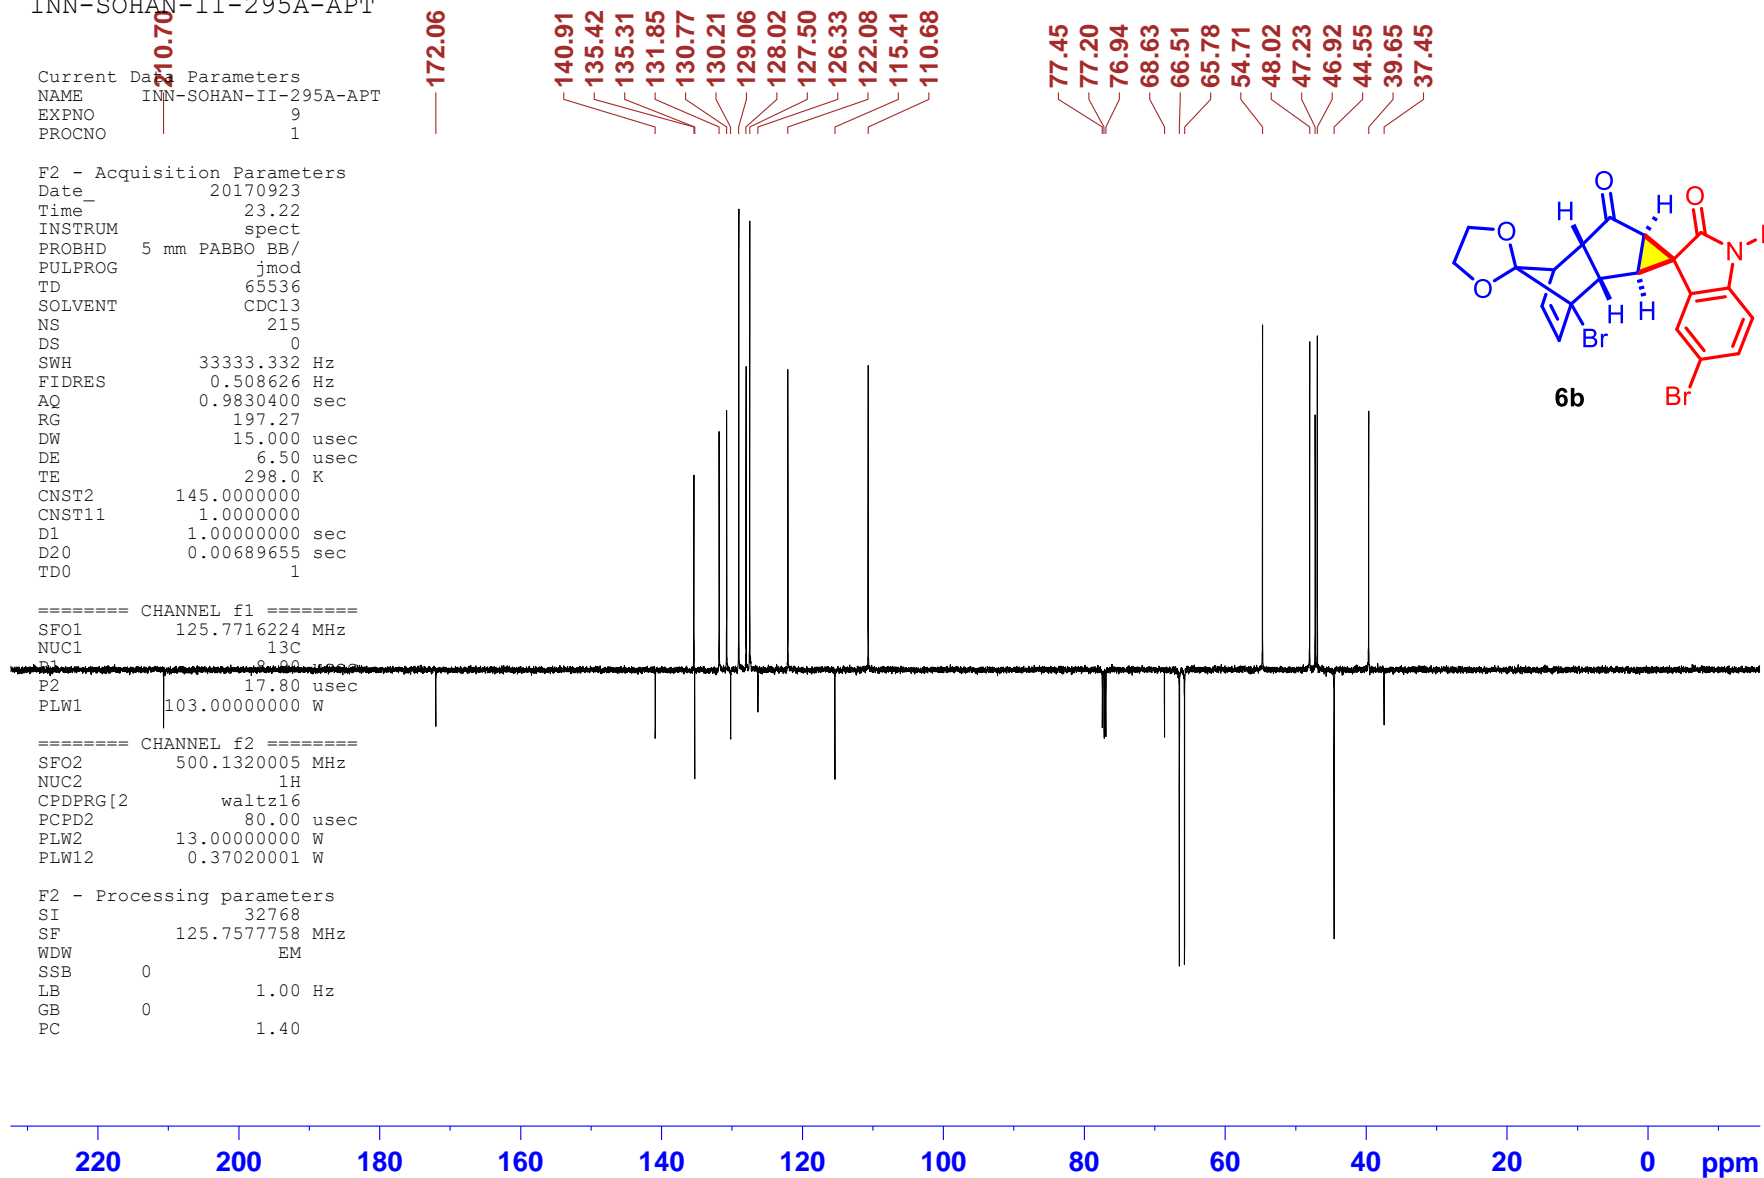

Figure S30. <sup>13</sup>C-APT NMR of compound 6b

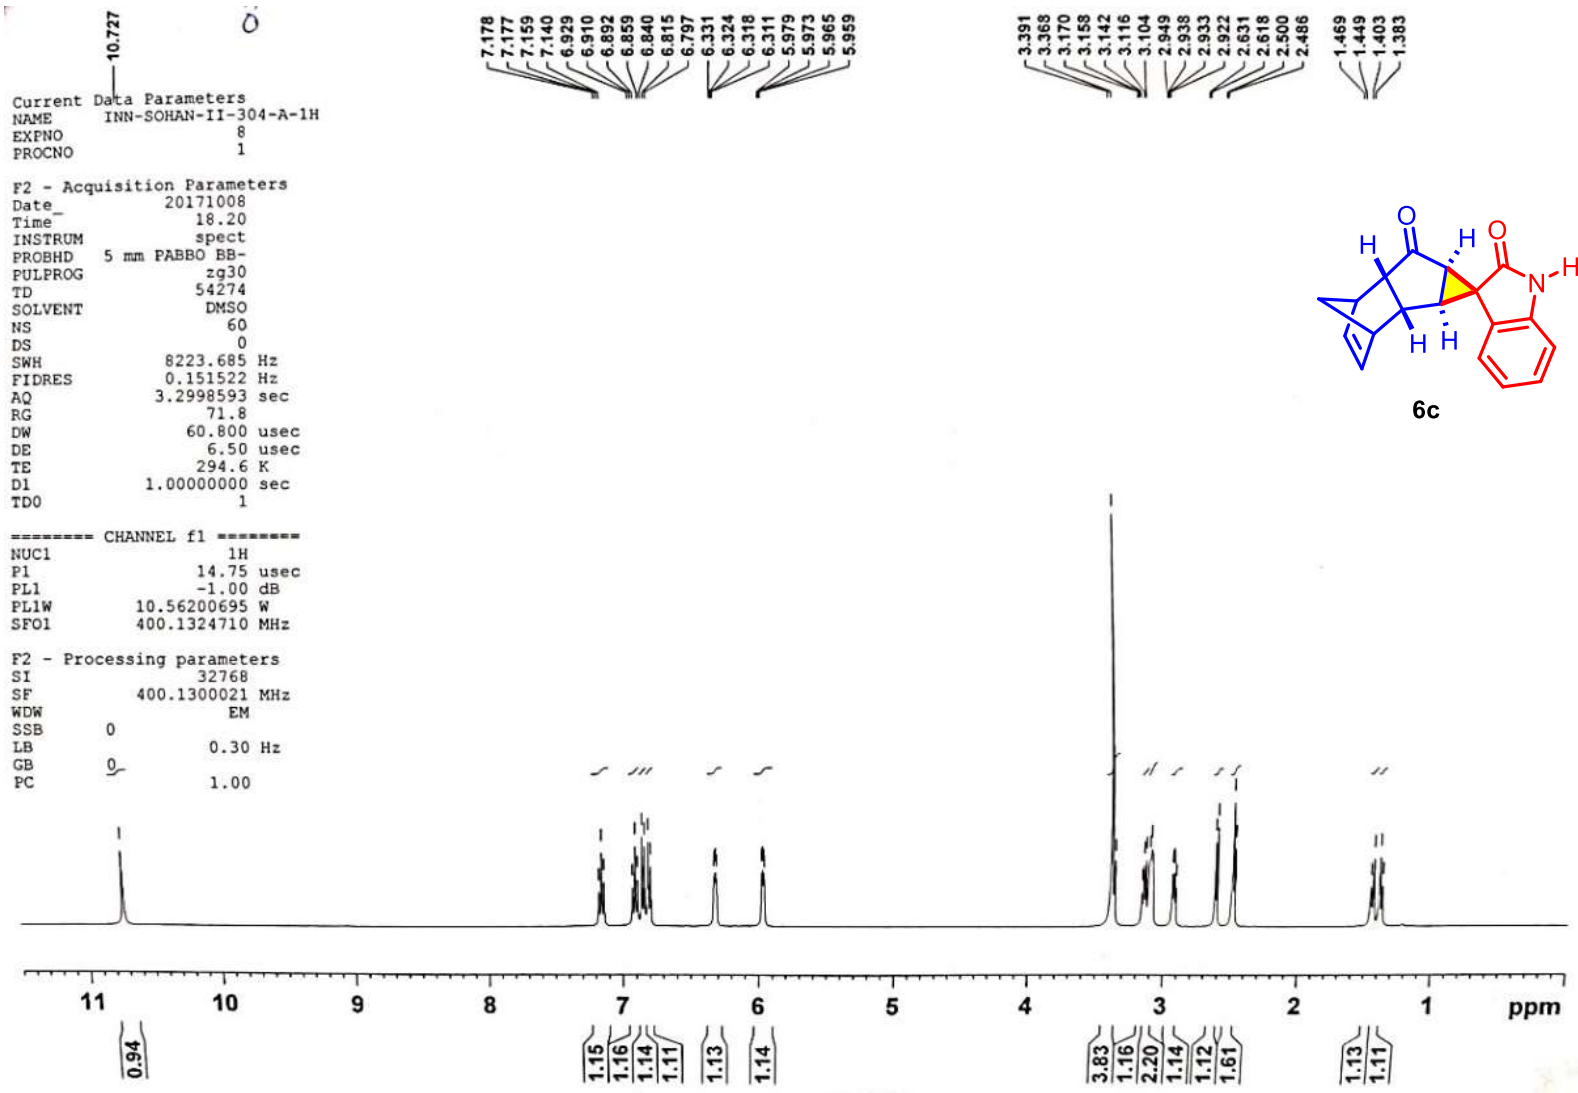

Figure S31. <sup>1</sup>H NMR of compound 6c

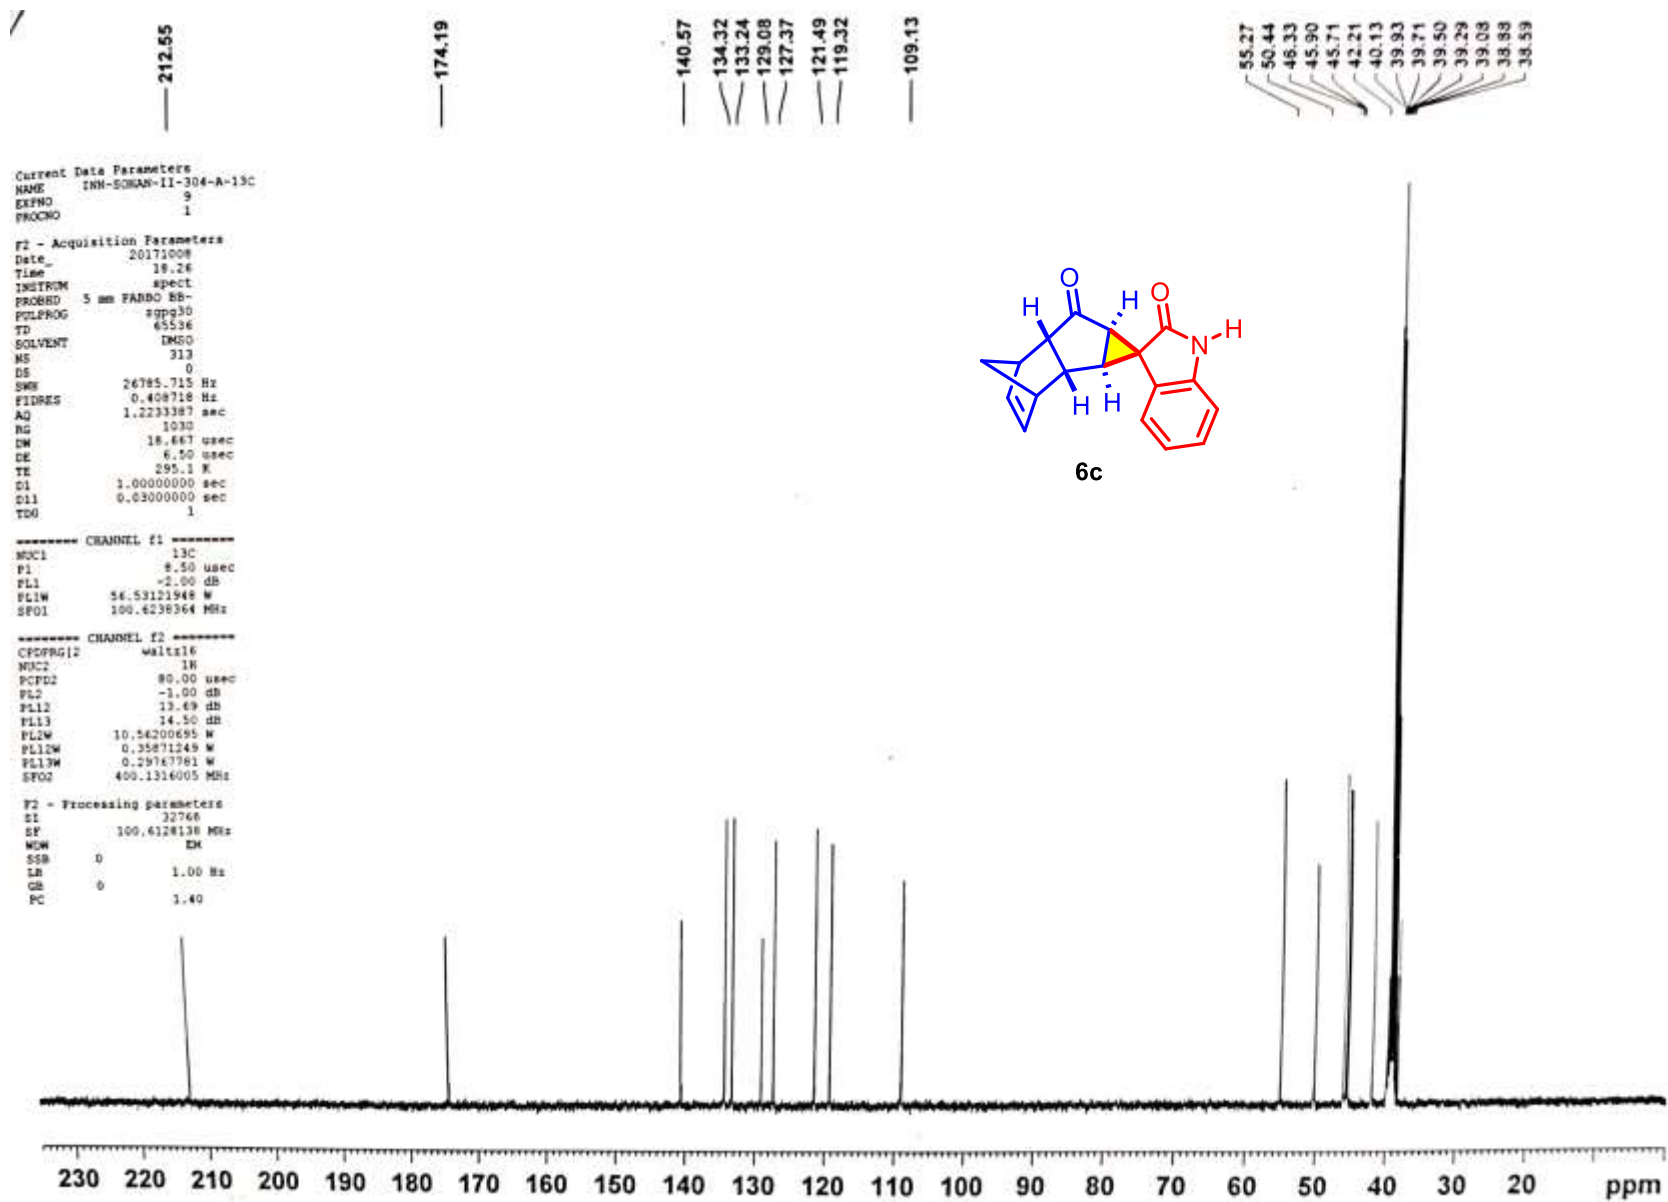

Figure S32. <sup>13</sup>C NMR of compound 6c

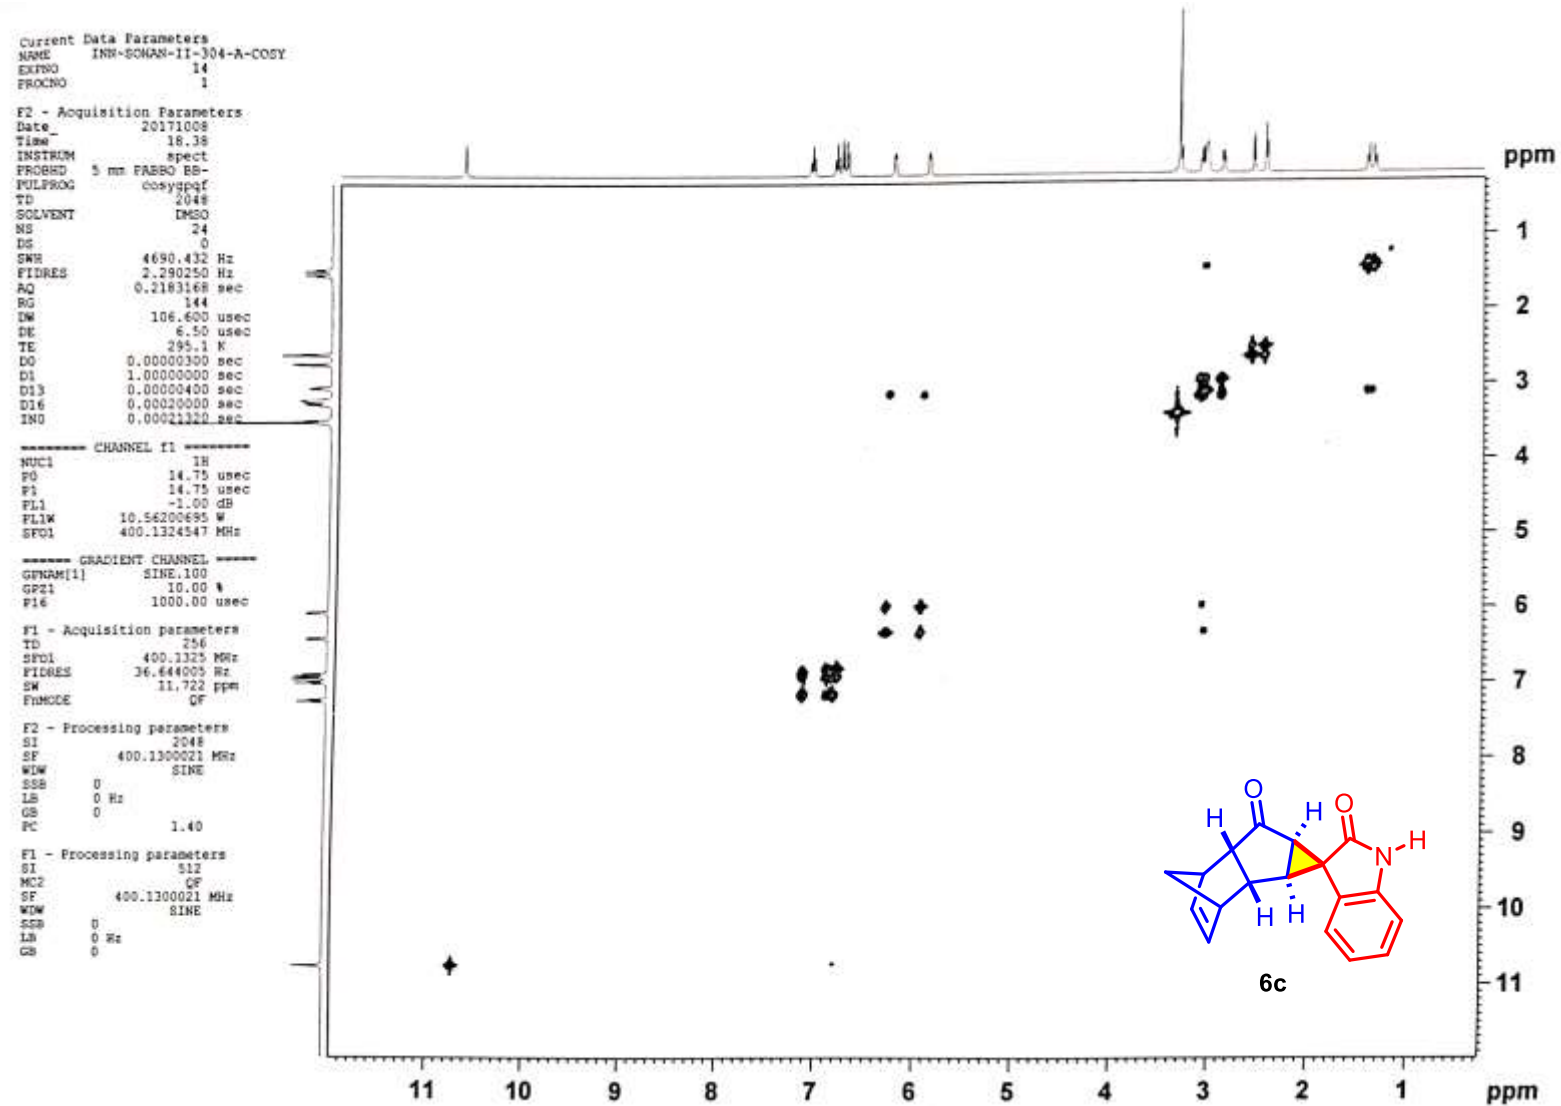

Figure S33.  $^1\text{H}$ - $^1\text{H}$  COSY NMR of compound **6c**

```

Current Data Parameters
NAME      IHW-SONAM-II-304-A-HQC
EXPNO    14
PROCNO   1

F2 - Acquisition Parameters
Date_    201708
Time     20.47
INSTRUM  spect
PROBHD   5 mm PABBO BB-
PULPROG  zgpg30
TD        65536
SOLVENT  DMSO
NS        64
DS        0
SWH       4004.879 Hz
FIDRES   2.248453 Hz
AQ        0.2222763 sec
RG        2050
IN       108.533 usec
DE        6.50 usec
TE        294.4 K
CMT2     145.8050000
D0        0.0000000 sec
D1        1.0000000 sec
D4        0.00172414 sec
D11       0.03000000 sec
D13       0.00000400 sec
D16       0.00020000 sec
IM0       0.00002345 sec
ZGPGPRG  3

===== CHANNEL F1 =====
NUC1      1H
P1        14.75 usec
P2        29.50 usec
P28       0.10 usec
PL1       -1.00 dB
PL18      10.54206495 dB
SFO1      400.1324961 MHz

===== CHANNEL F2 =====
CPDPRG2  gpg3
NUC2      13C
P3        8.50 usec
P4        17.00 usec
PCPD2    70.00 usec
PL2       -2.00 dB
PL12      16.31 dB
PL28      56.53121948 dB
PL18M    0.83423501 dB
SFO2      100.628425 MHz

===== GRADIENT CHANNEL =====
GPMAX[1] 218.100
GPMAX[2] 218.100
GPI1     80.00 %
GPI2     20.20 %
GPI3     1000.00 usec

F1 - Acquisition parameters
TD        65536
SFO1      100.6284 MHz
FIDRES   160.805252 Hz
SW        211.744 ppm
F0MDC5   Echo-Antiecho

F2 - Processing parameters
SI        2048
SF        400.1305021 MHz
WDW       GAUSS
SSB       2
LB        0 Hz
GB        0
PC        1.40

F1 - Processing parameters
SI        1024
MC2       echo-antiecho
SF        100.6128138 MHz
WDW       GAUSS
SSB       2
LB        0 Hz
GB        0

```

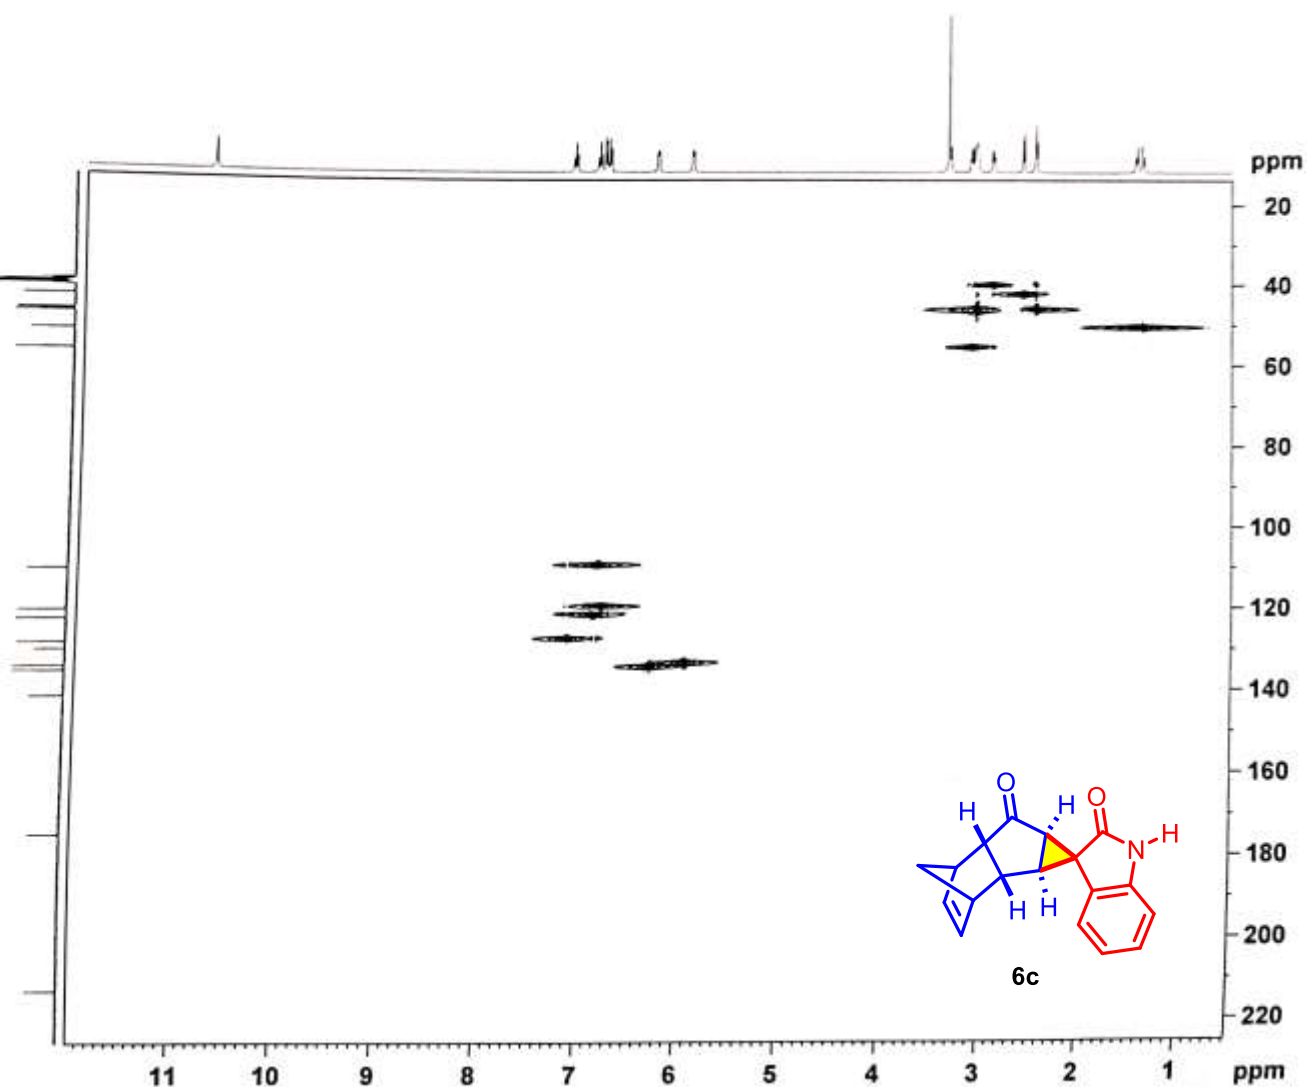

Figure S34. <sup>1</sup>H-<sup>13</sup>C HSQC NMR of compound 6c

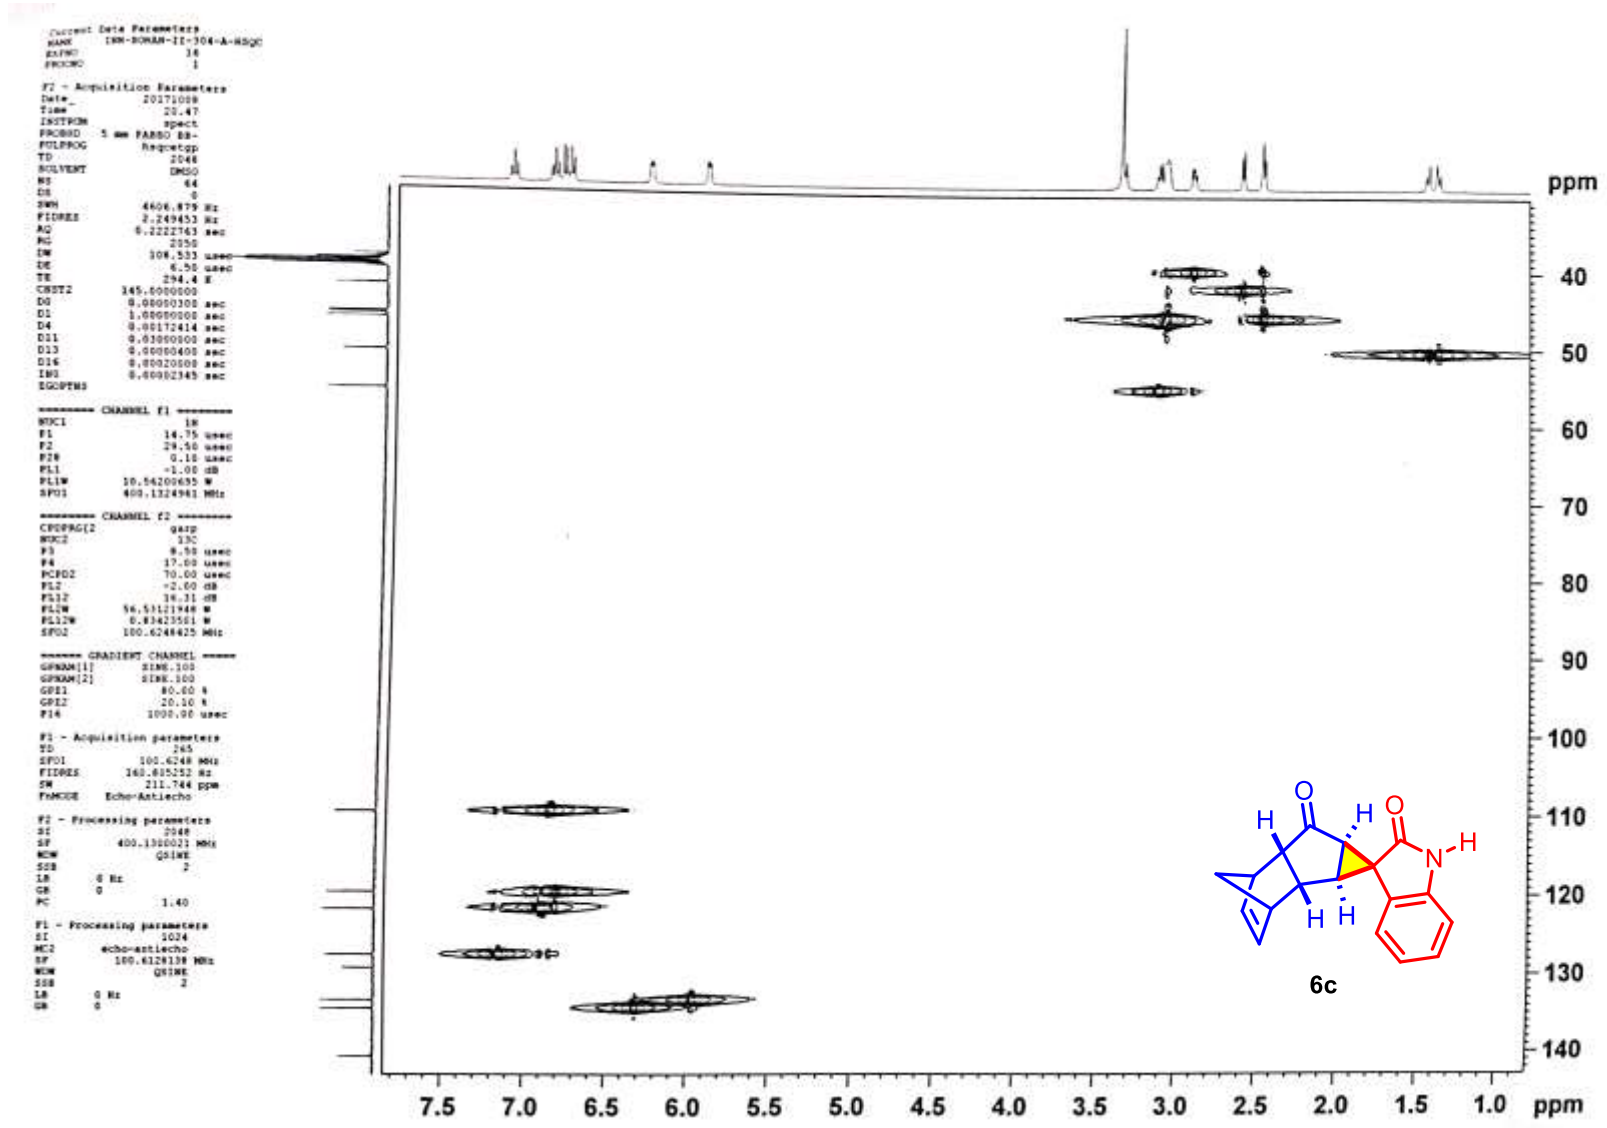

Figure S34a. Expansion of  $^1\text{H}$ - $^{13}\text{C}$  HSQC NMR of compound 6c

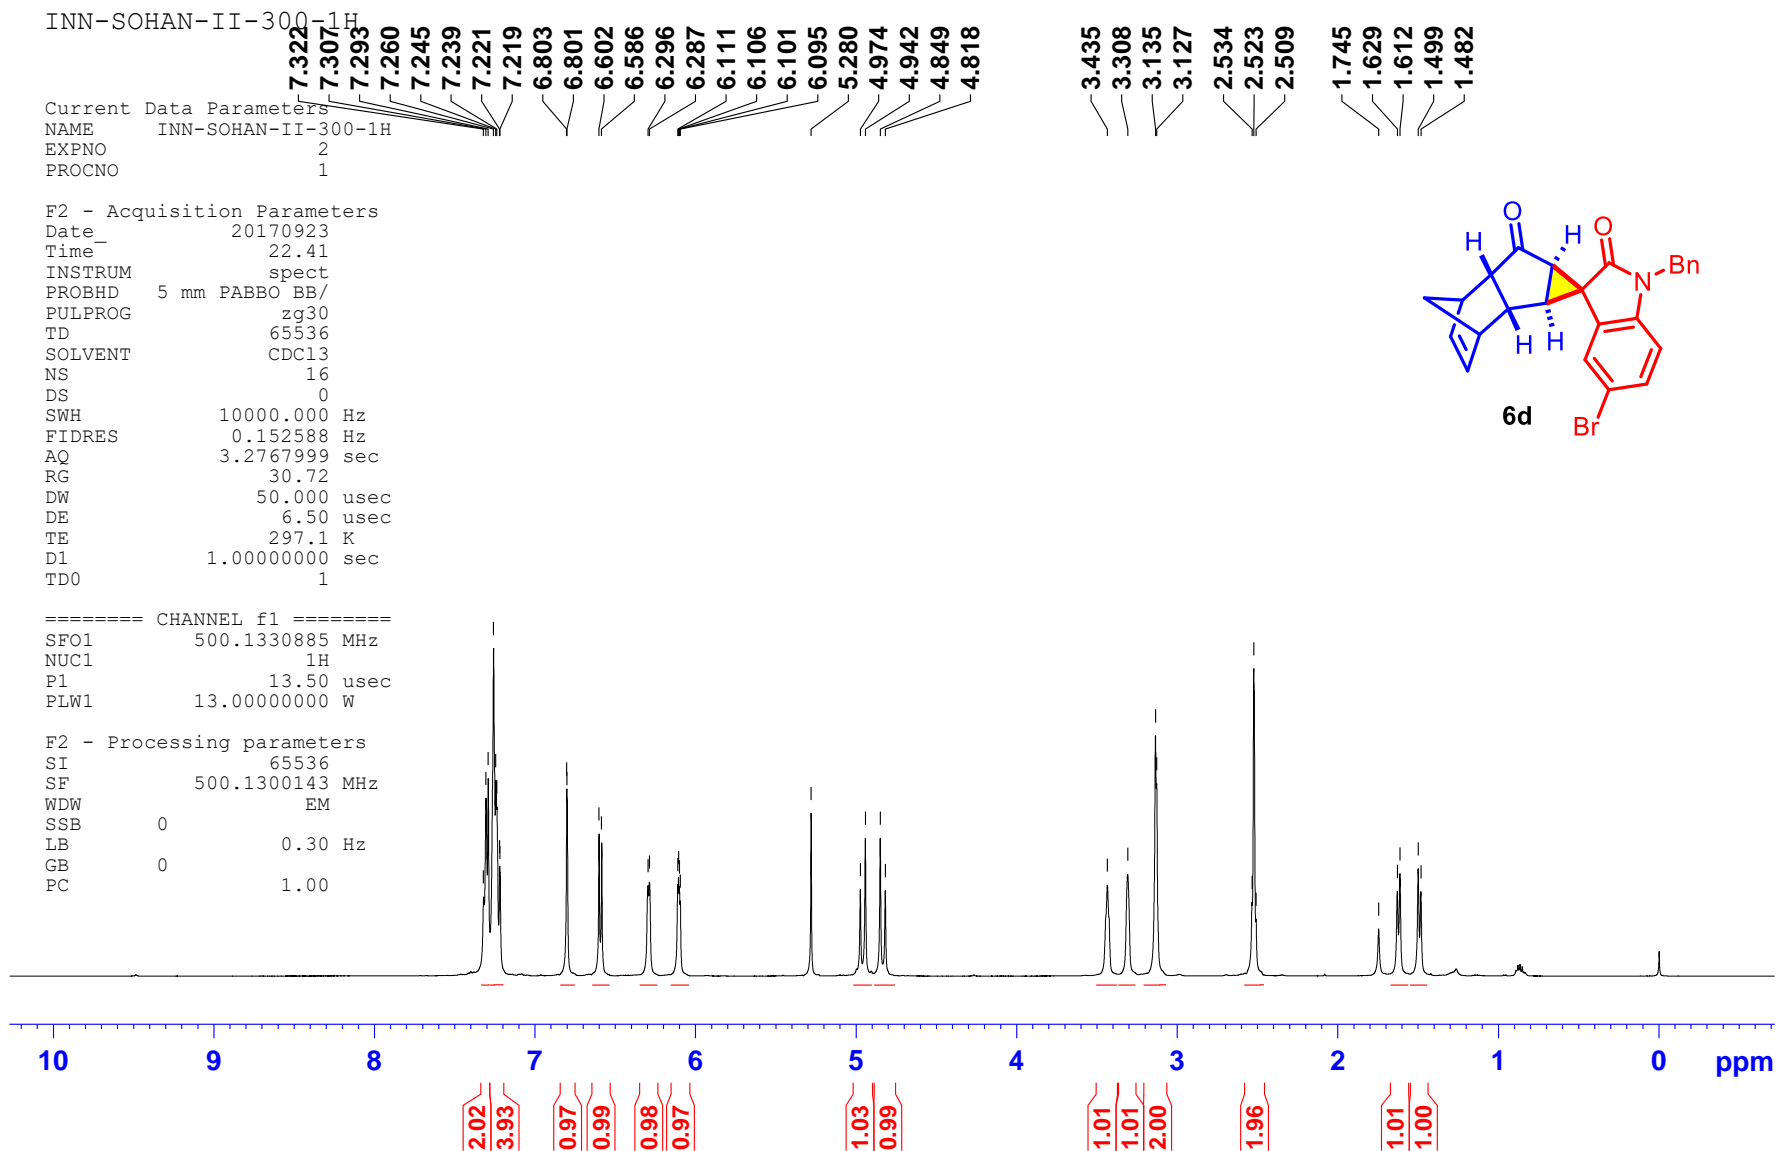

Figure S35. <sup>1</sup>H NMR of compound **6d**

INN-SOHAN-II-300-13C

Current Data Parameters  
NAME INN-SOHAN-II-300-13C  
EXPNO 4  
PROCNO 1

F2 - Acquisition Parameters  
Date\_ 20170923  
Time\_ 22.45  
INSTRUM spect  
PROBHD 5 mm PABBO BB/  
PULPROG zgpg30  
TD 65536  
SOLVENT CDCl3  
NS 183  
DS 0  
SWH 33333.332 Hz  
FIDRES 0.508626 Hz  
AQ 0.9830400 sec  
RG 197.27  
DW 15.000 usec  
DE 6.50 usec  
TE 297.7 K  
D1 1.00000000 sec  
D11 0.03000000 sec  
TD0 1

==== CHANNEL f1 =====  
SFO1 125.7716224 MHz  
NUC1 13C  
P1 8.90 usec  
PLW1 103.00000000 W

==== CHANNEL f2 =====  
SFO2 500.1320005 MHz  
NUC2 1H  
CPDPRG[2] waltz16  
PCPD2 80.00 usec  
PLW2 13.00000000 W  
PLW12 0.37020001 W  
PLW13 0.18621001 W

F2 - Processing parameters  
SI 32768  
SF 125.7577786 MHz  
WDW EM  
SSB 0  
LB 1.00 Hz  
GB 0  
DC 1.40

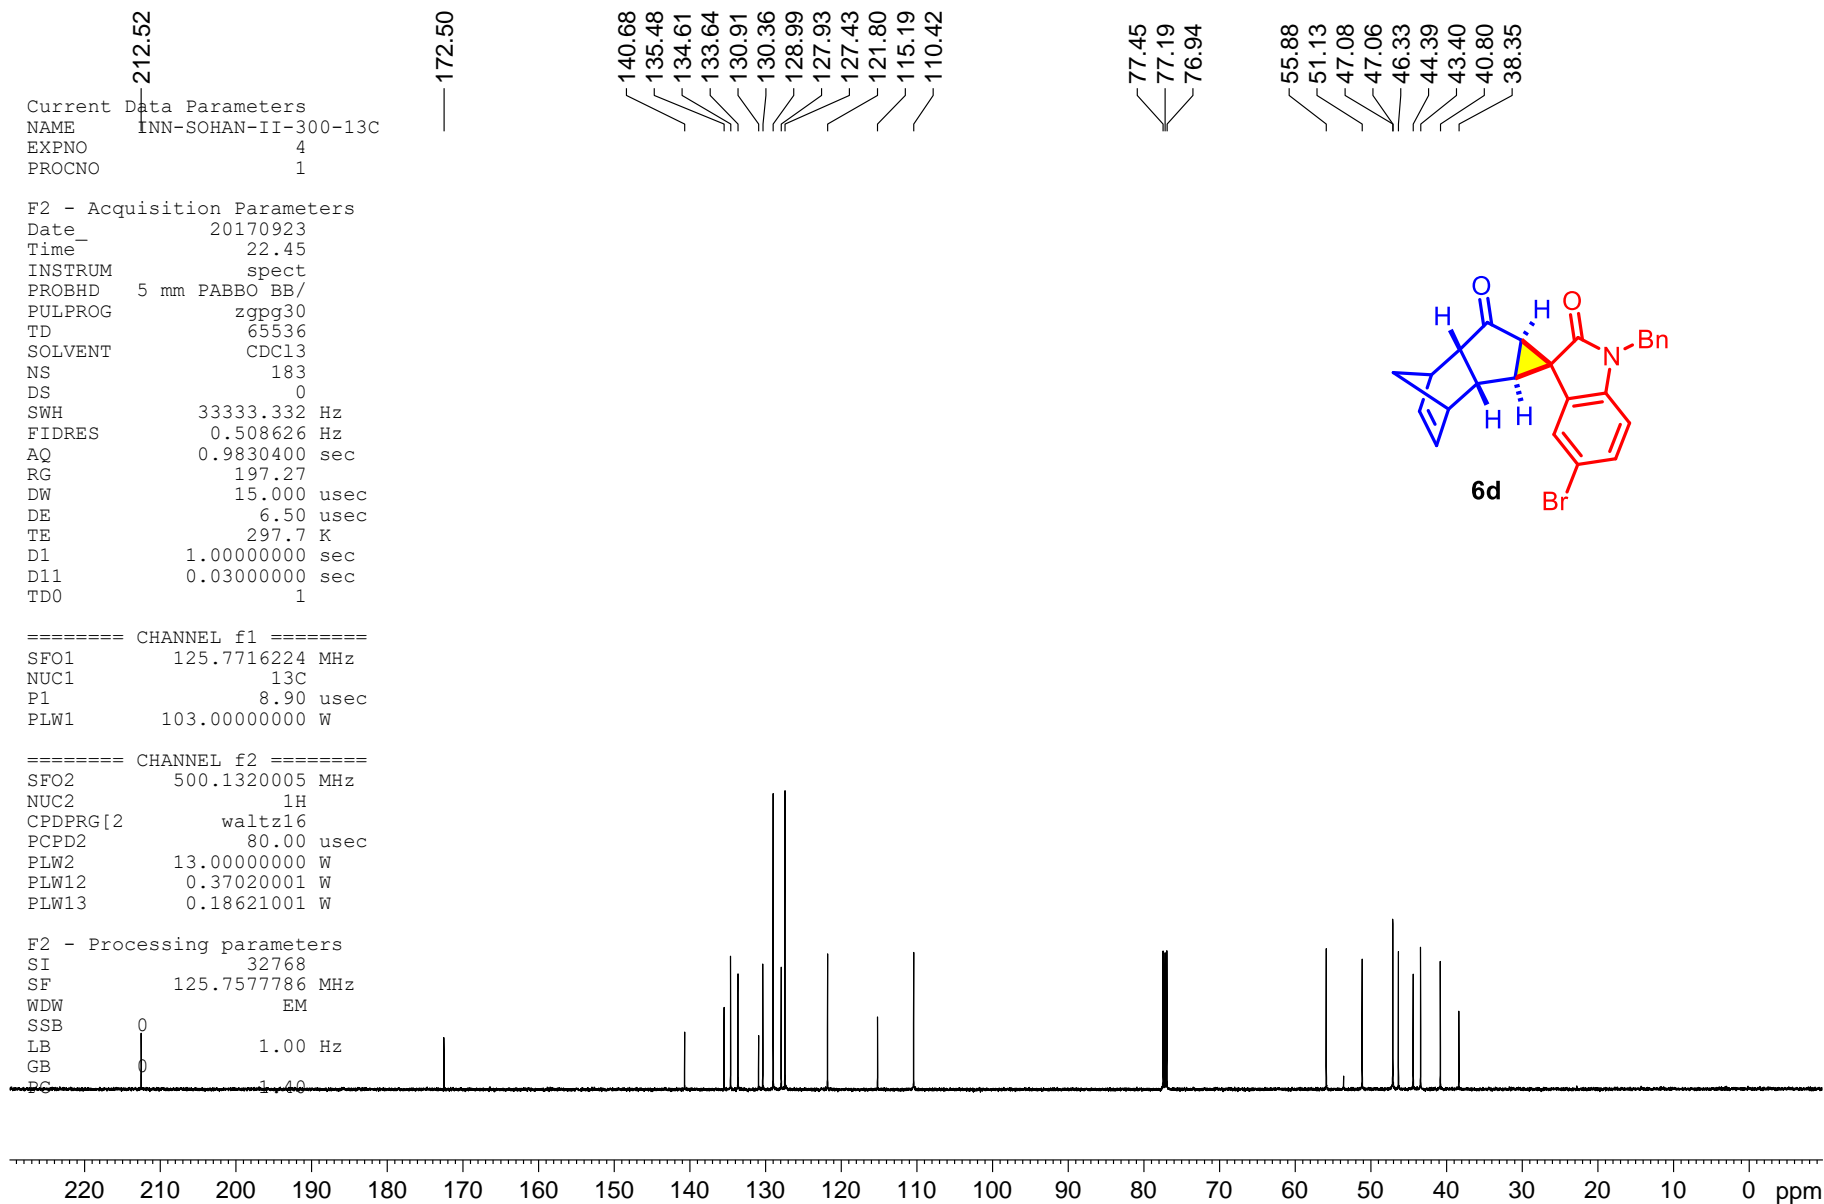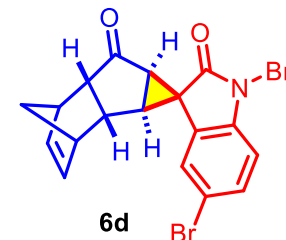

Figure S36. <sup>13</sup>C NMR of compound **6d**

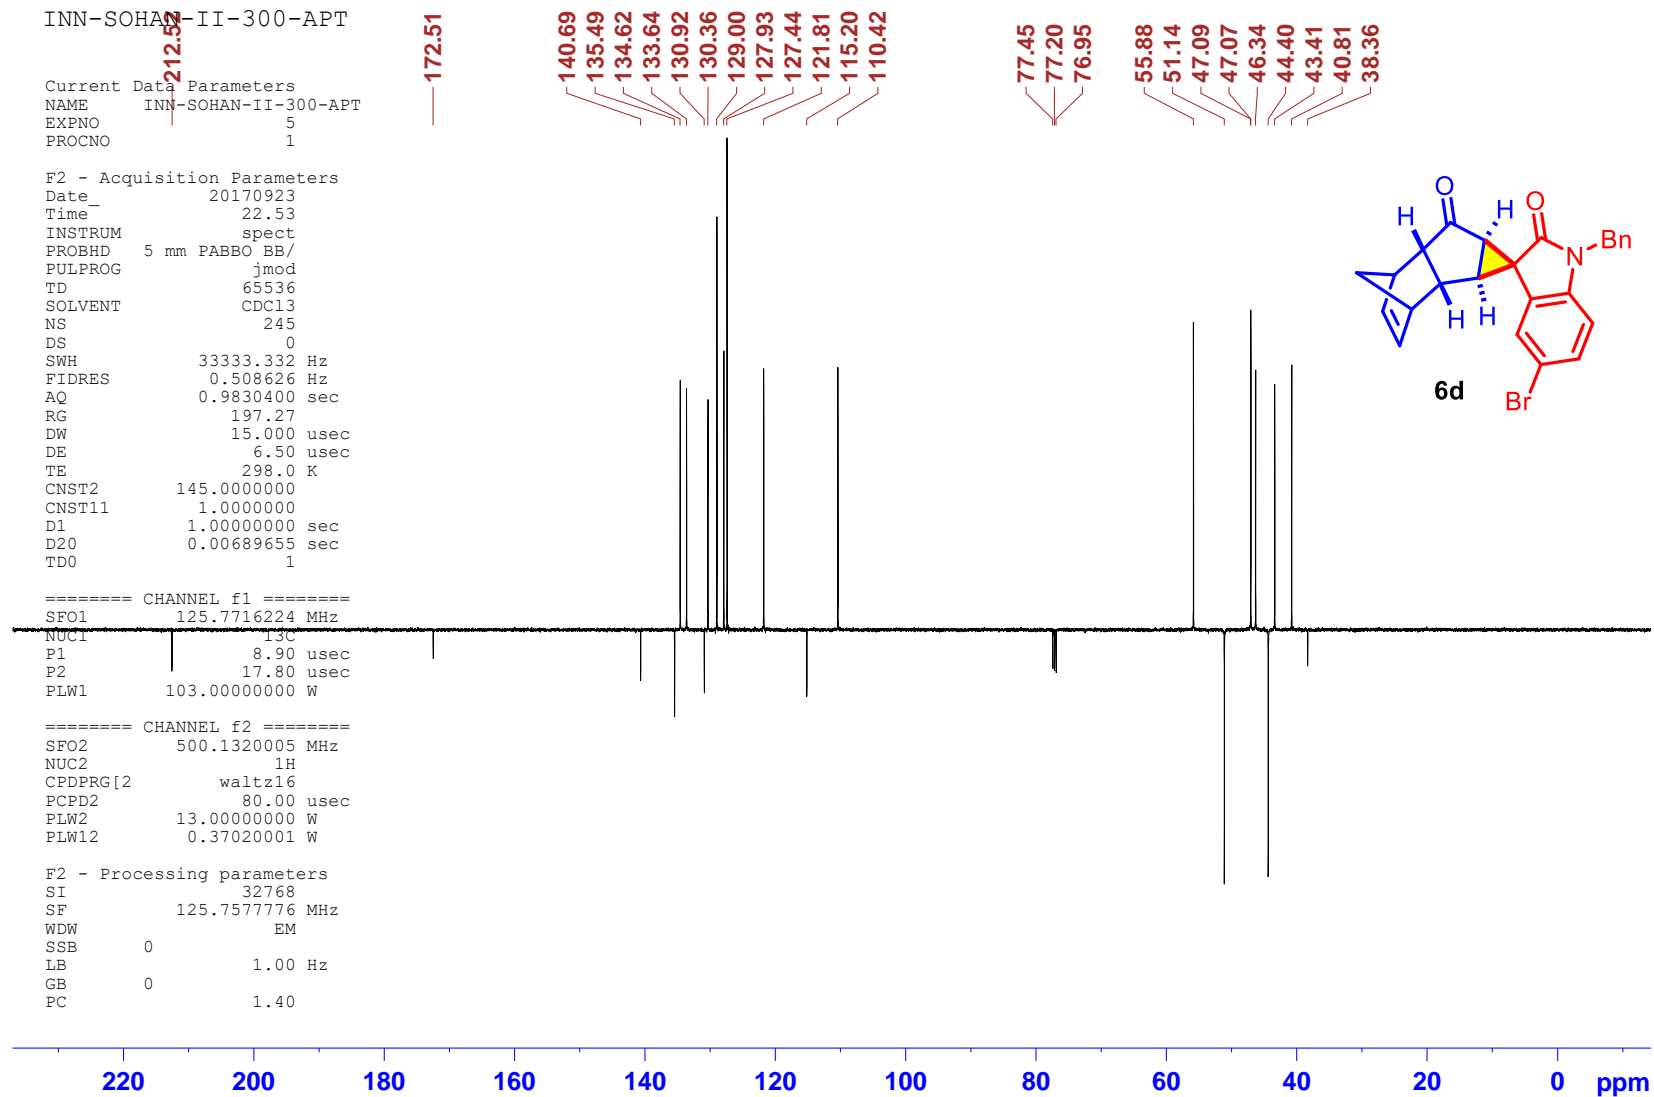

Figure S37. <sup>13</sup>C-APT NMR of compound 6d

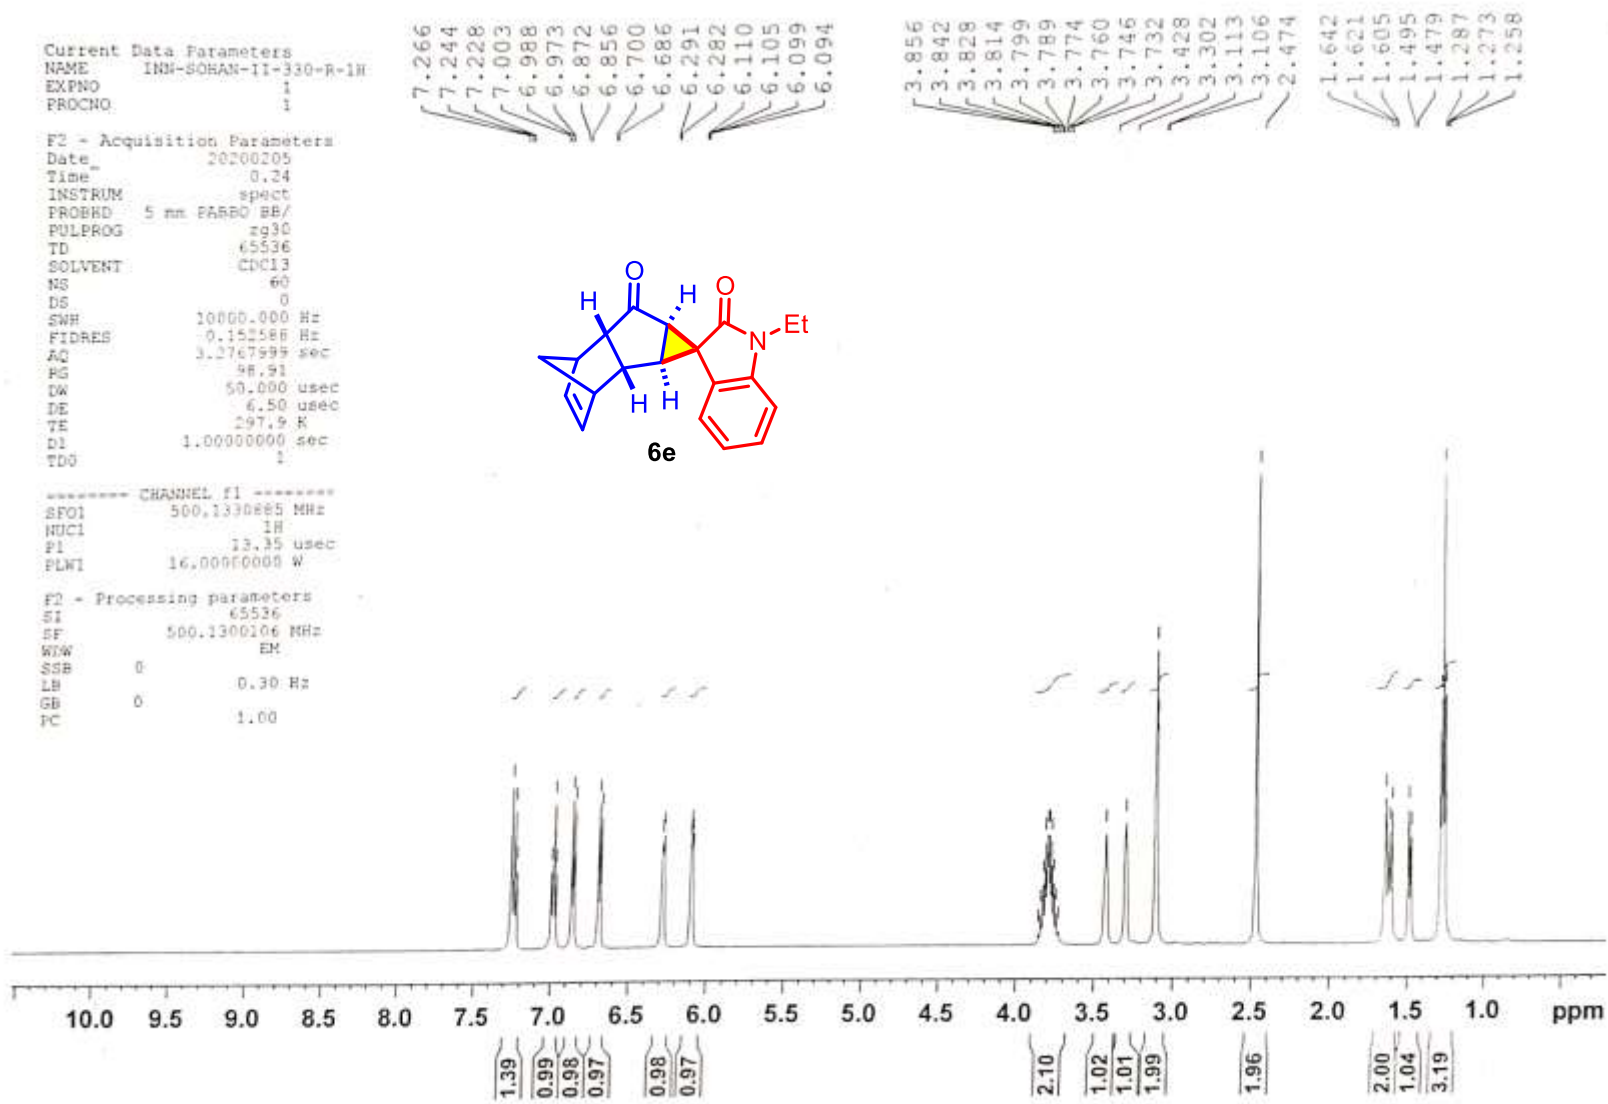

Figure S38. <sup>1</sup>H NMR of compound 6e

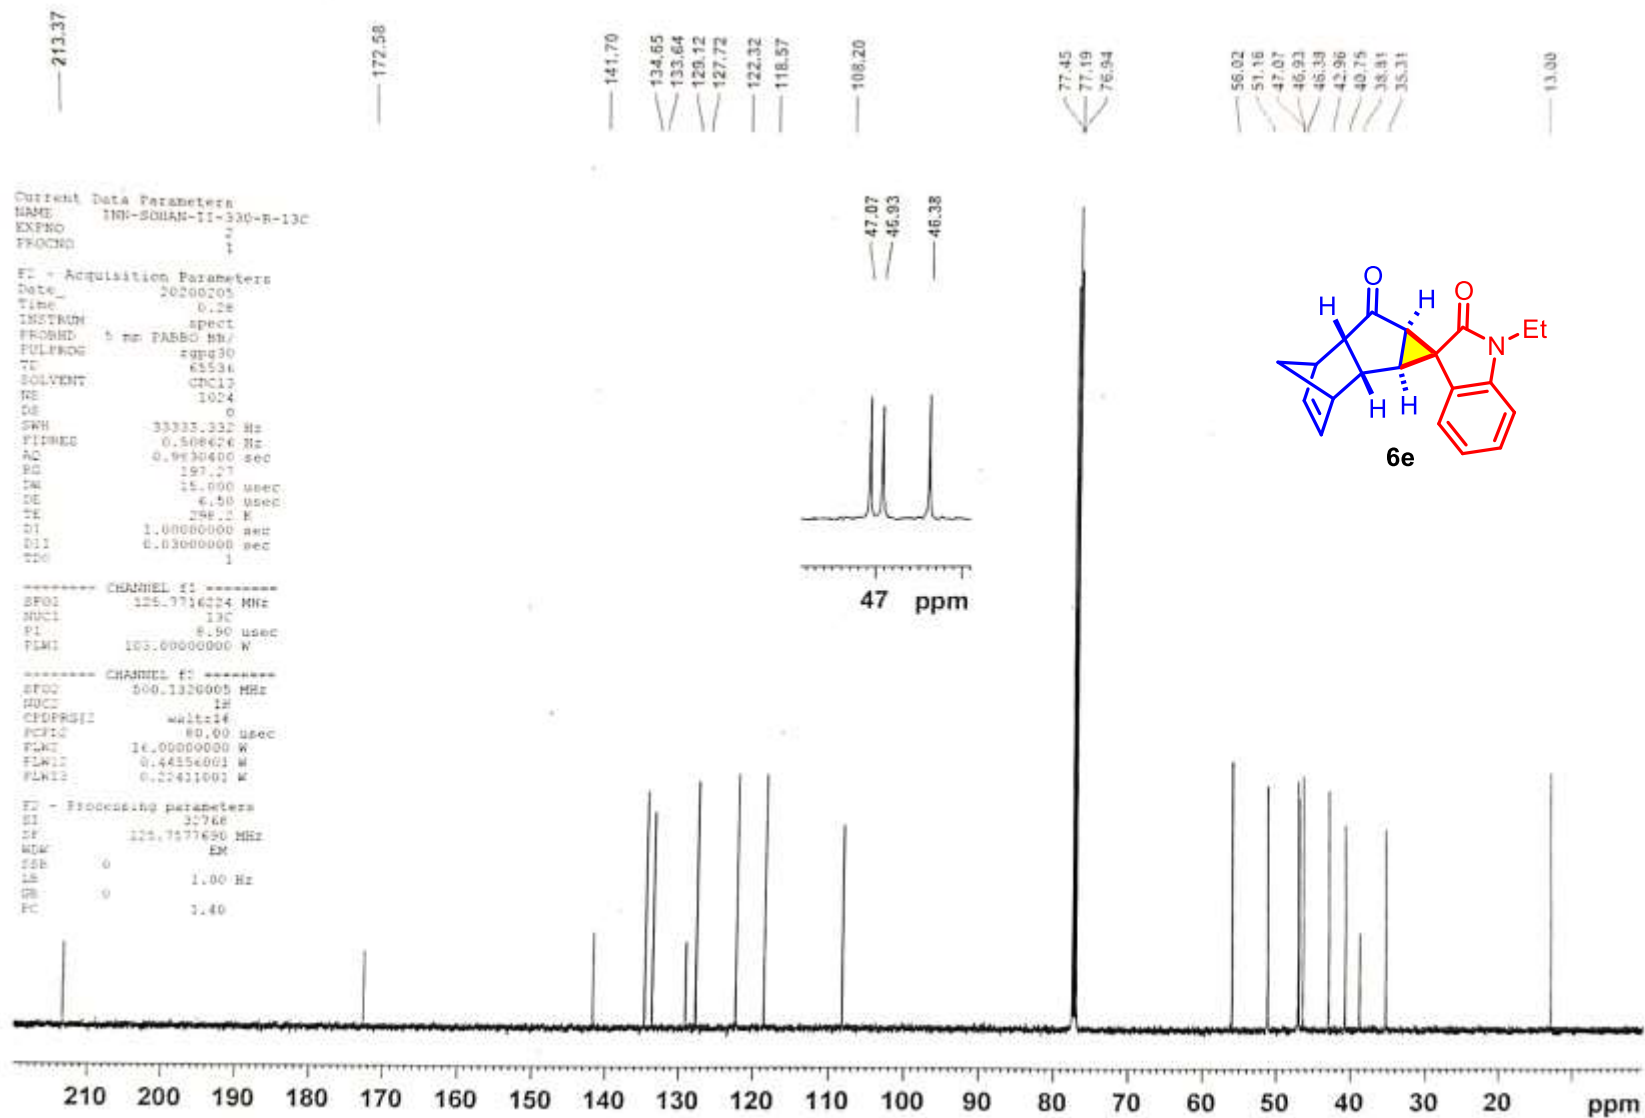

Figure S39.  $^{13}\text{C}$  NMR of compound **6e**

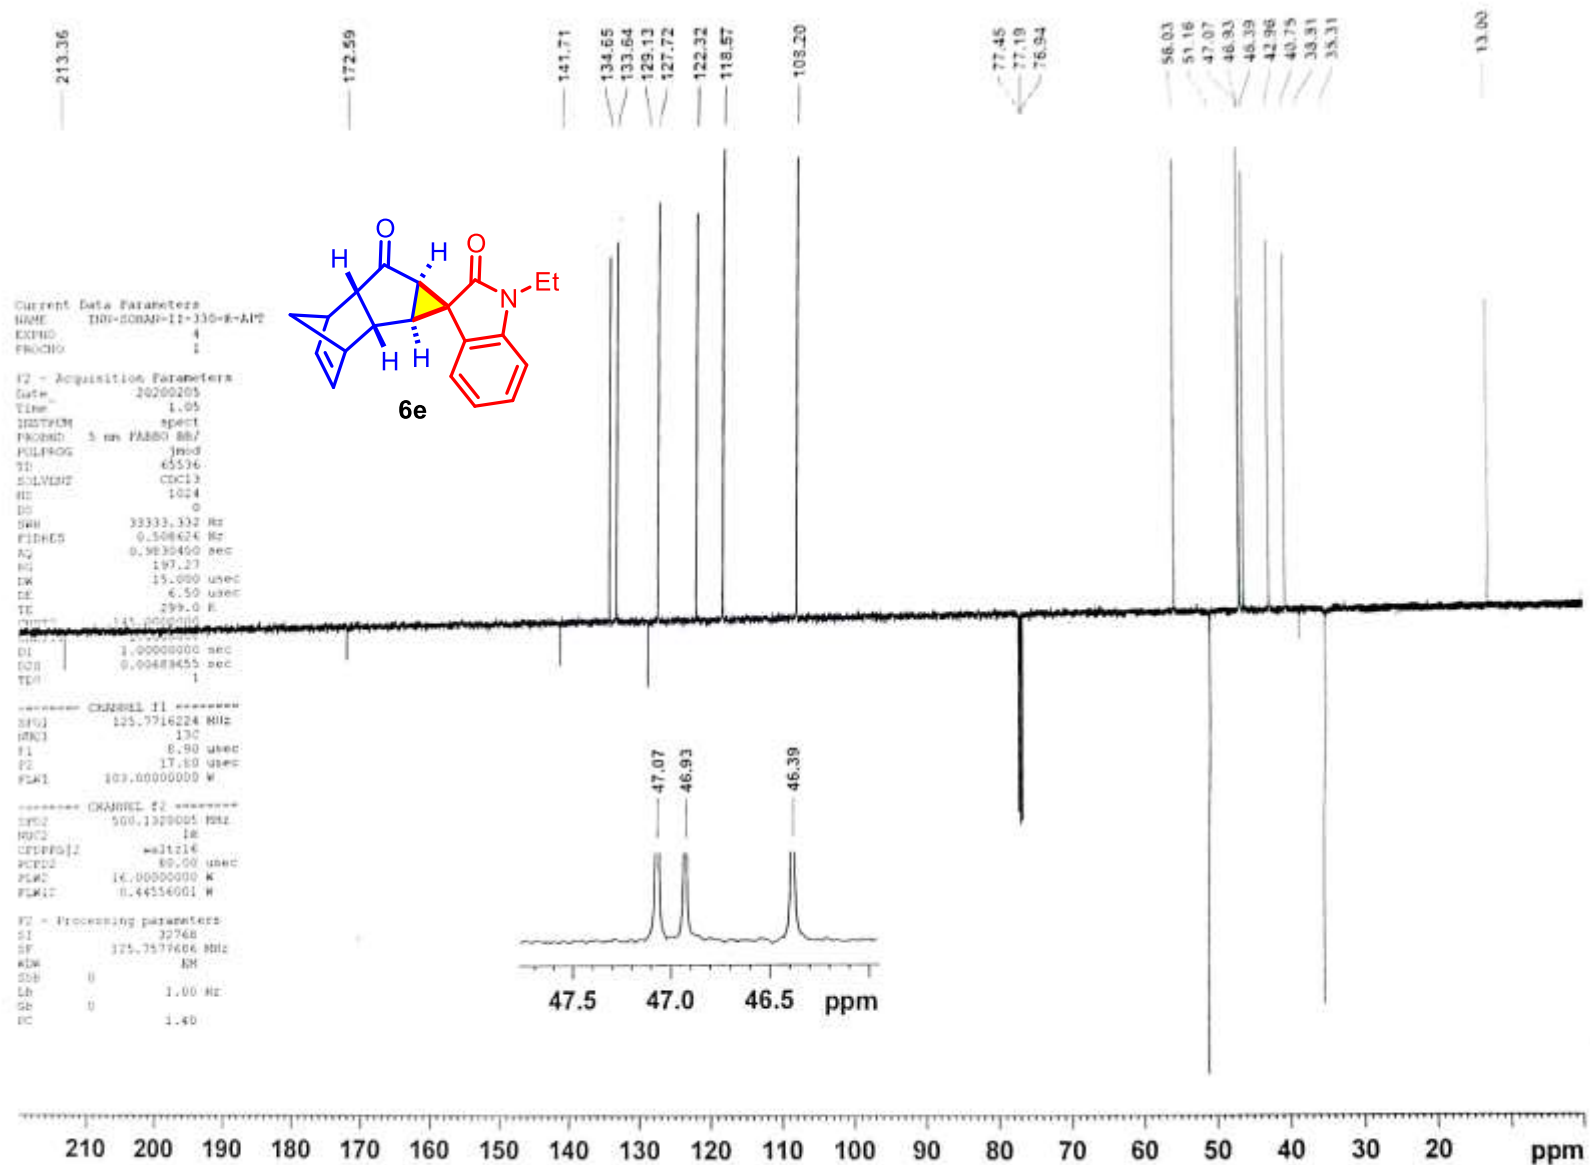

Figure S40. <sup>13</sup>C-APT NMR of compound **6e**

Current Data Parameters  
NAME 11H-COSY-11-330-R-COSY  
EXPNO 1  
PROCNO 1

F2 - Acquisition Parameters

Date\_ 20080705  
Time 1.36  
INSTRUM spect  
PROBHD 5 mm PABBO BB/  
PULPROG zgpg30  
TD 2048  
SOLVENT CDCl3  
SI 16  
SF 4940.712 Hz  
FIDRES 7.412457 Hz  
AQ 0.2072574 sec  
RG 197.27  
DW 101.200 usec  
DE 6.50 usec  
TE 299.4 K  
D0 0.0000000 sec  
D1 1.0000000 sec  
D11 0.0300000 sec  
D12 0.0000000 sec  
D13 0.0000400 sec  
D14 0.0000000 sec  
IND 0.00020249 sec

----- CHANNEL f1 -----

SP01 500.1325484 MHz  
NUC1 1H  
PC 13.35 usec  
PT 13.35 usec  
P17 0.0000000 usec  
PLM1 14.0000000 W  
PLM0 3.14840005 W

----- GRADIENT CHANNEL -----

GRAN11 SMO10.100  
GP21 10.00  
G14 1070.00 usec

F1 - Acquisition parameters

TD 256  
SF01 500.1326 MHz  
FIDRES 38.594306 Hz  
AQ 9.879 sec  
RG0000 0

F2 - Processing parameters

SI 1024  
SF 500.1300104 MHz  
WDW QOINE  
SSB 0  
LB 0 Hz  
GB 0  
PC 1.40

F1 - Processing parameters

SI 1024  
WDW QF  
SF 500.1300104 MHz  
WDW QOINE  
SSB 0  
LB 0 Hz  
GB 0

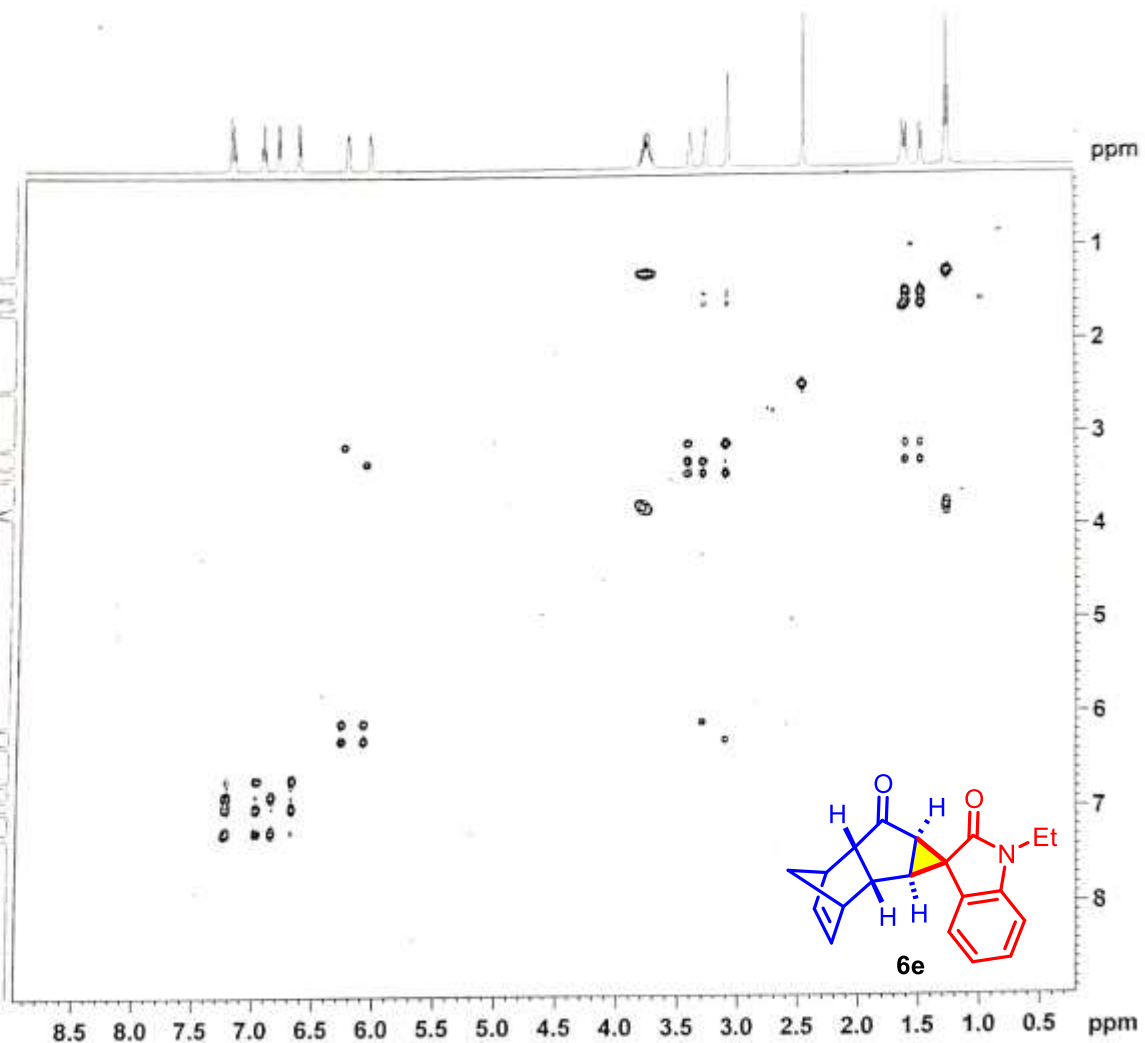

Figure S41. <sup>1</sup>H-<sup>1</sup>H COSY NMR of compound 6e

Current Data Parameters  
NAME INN-SOHAN-184D-1H  
EXPNO 10  
PROCNO 1

F2 - Acquisition Parameters  
Date\_ 20150401  
Time\_ 15.43  
INSTRUM spect  
PROBHD 5 mm PABBO BB-  
PULPROG zg30  
TD 54274  
SOLVENT DMSO  
NS 9  
DS 0  
SWH 8223.685 Hz  
FIDRES 0.151522 Hz  
AQ 3.2998593 sec  
RG 32  
DW 60.800 usec  
DE 6.50 usec  
TE 295.0 K  
D1 1.00000000 sec  
TD0 1

----- CHANNEL f1 -----  
NUC1 1H  
P1 14.75 usec  
PL1 -1.00 dB  
PL1W 10.56200695 W  
SFO1 400.1324710 MHz

F2 - Processing parameters  
SI 32768  
SF 400.1300034 MHz  
WDW EM  
SSB 0  
LB 0.30 Hz  
GB 0  
PC 1.00

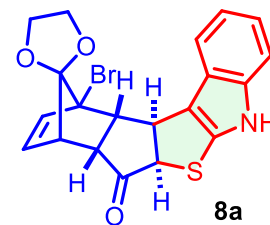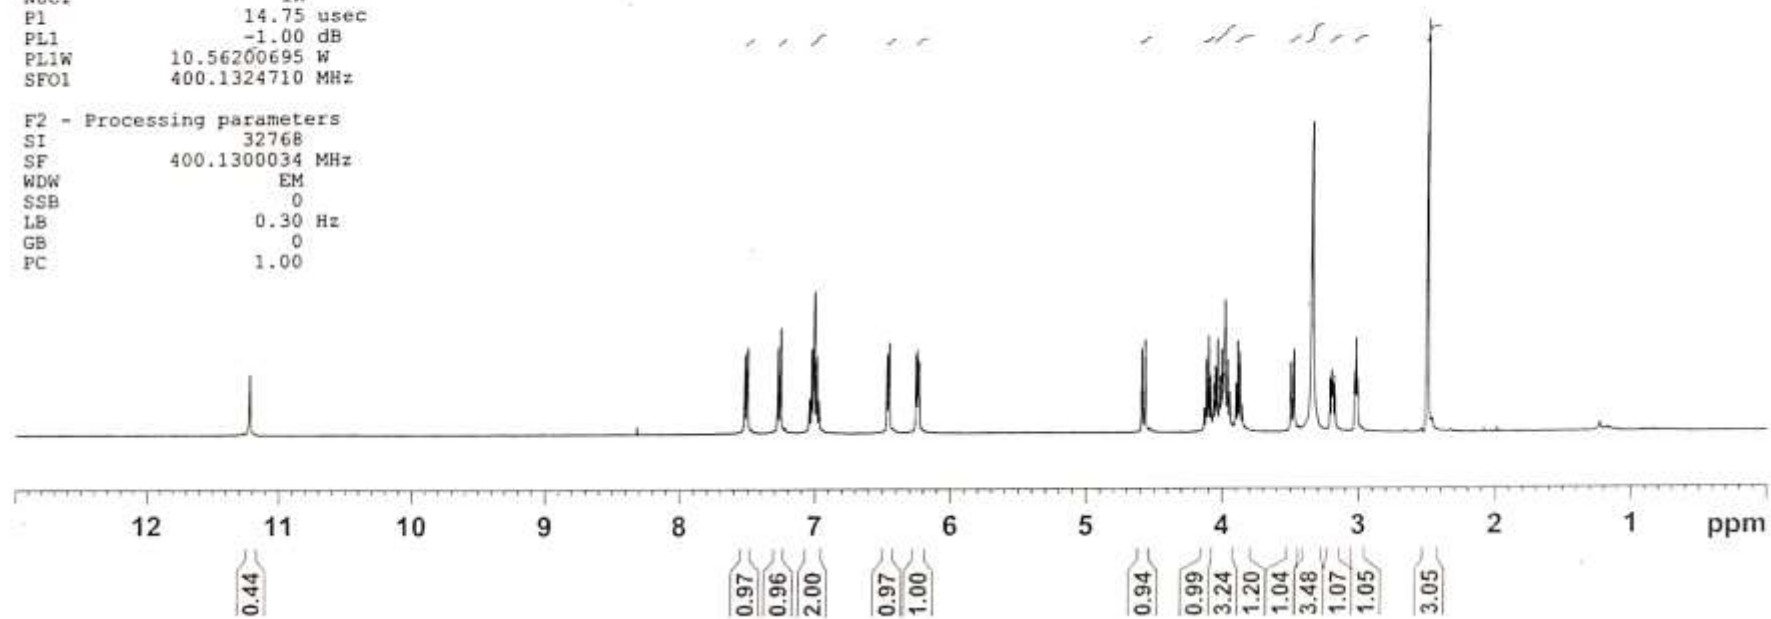

Figure S42. <sup>1</sup>H NMR of compound 8a

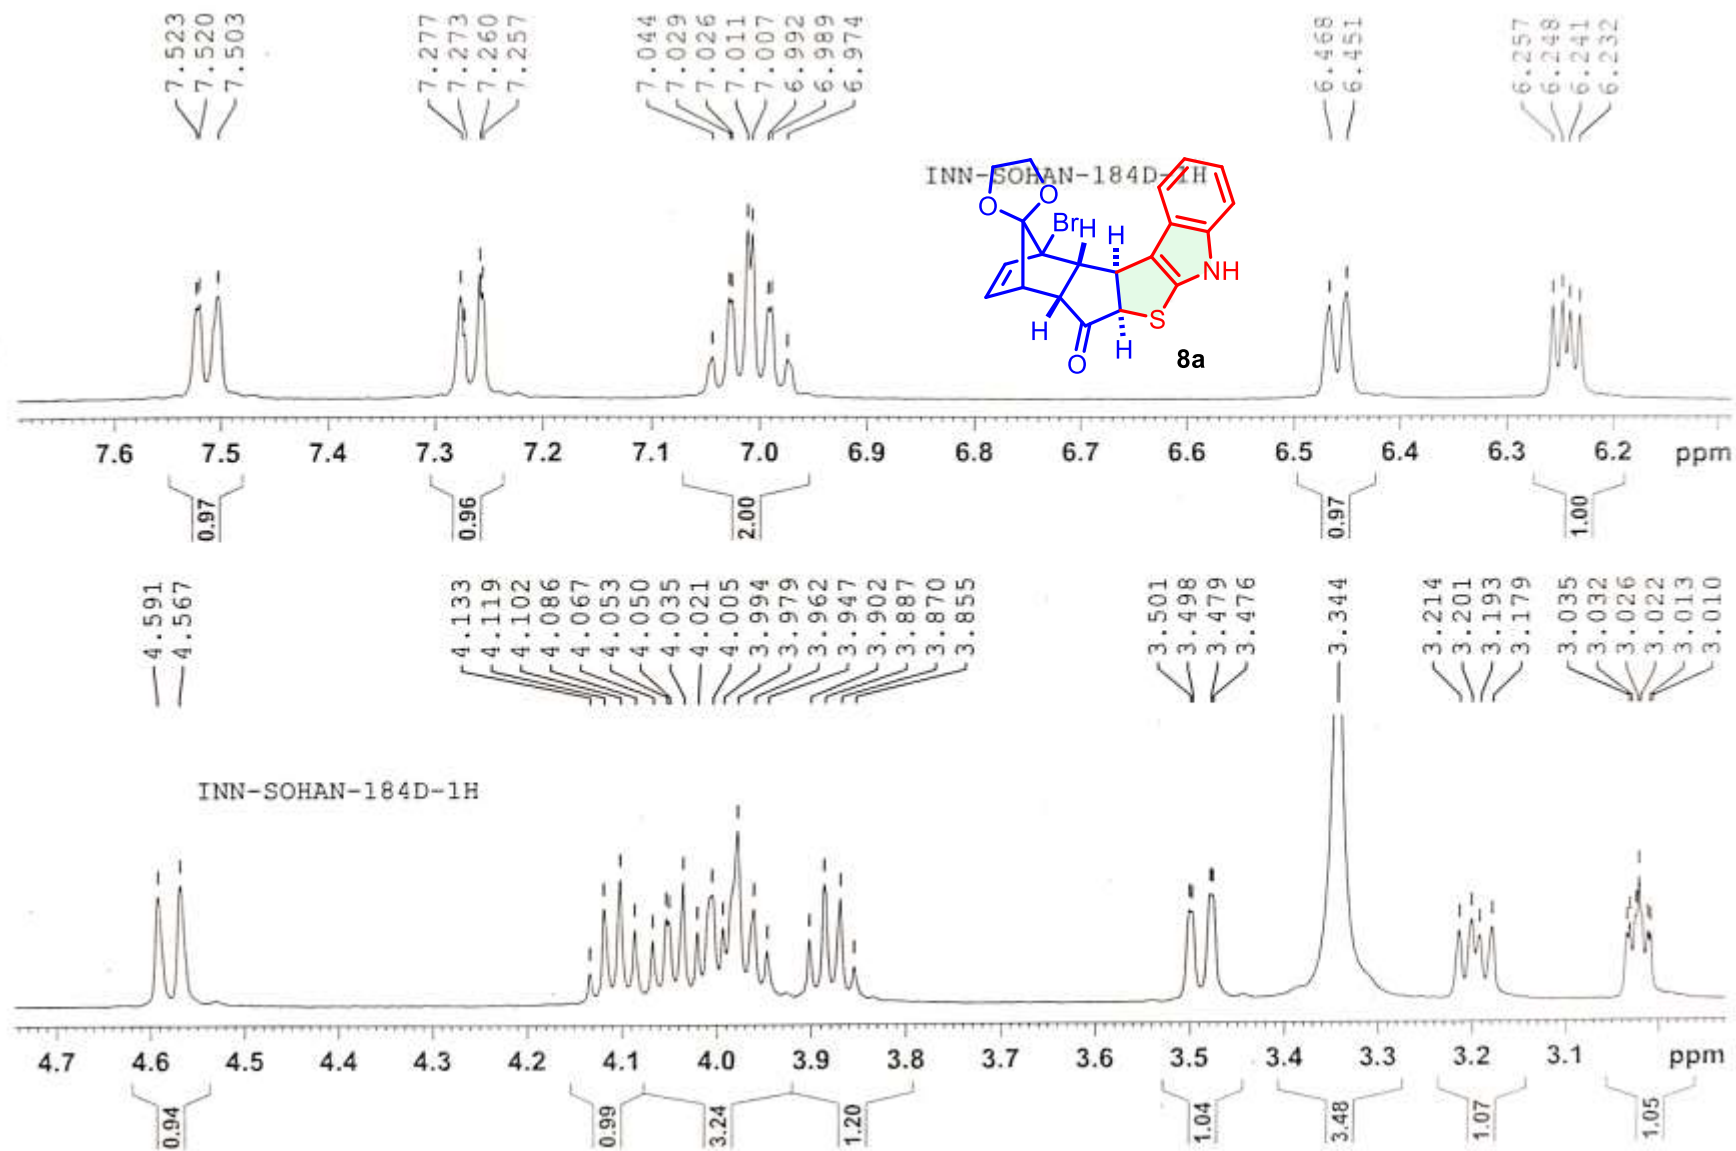

Figure S42a. Expansion of  $^1\text{H}$  NMR of compound 8a

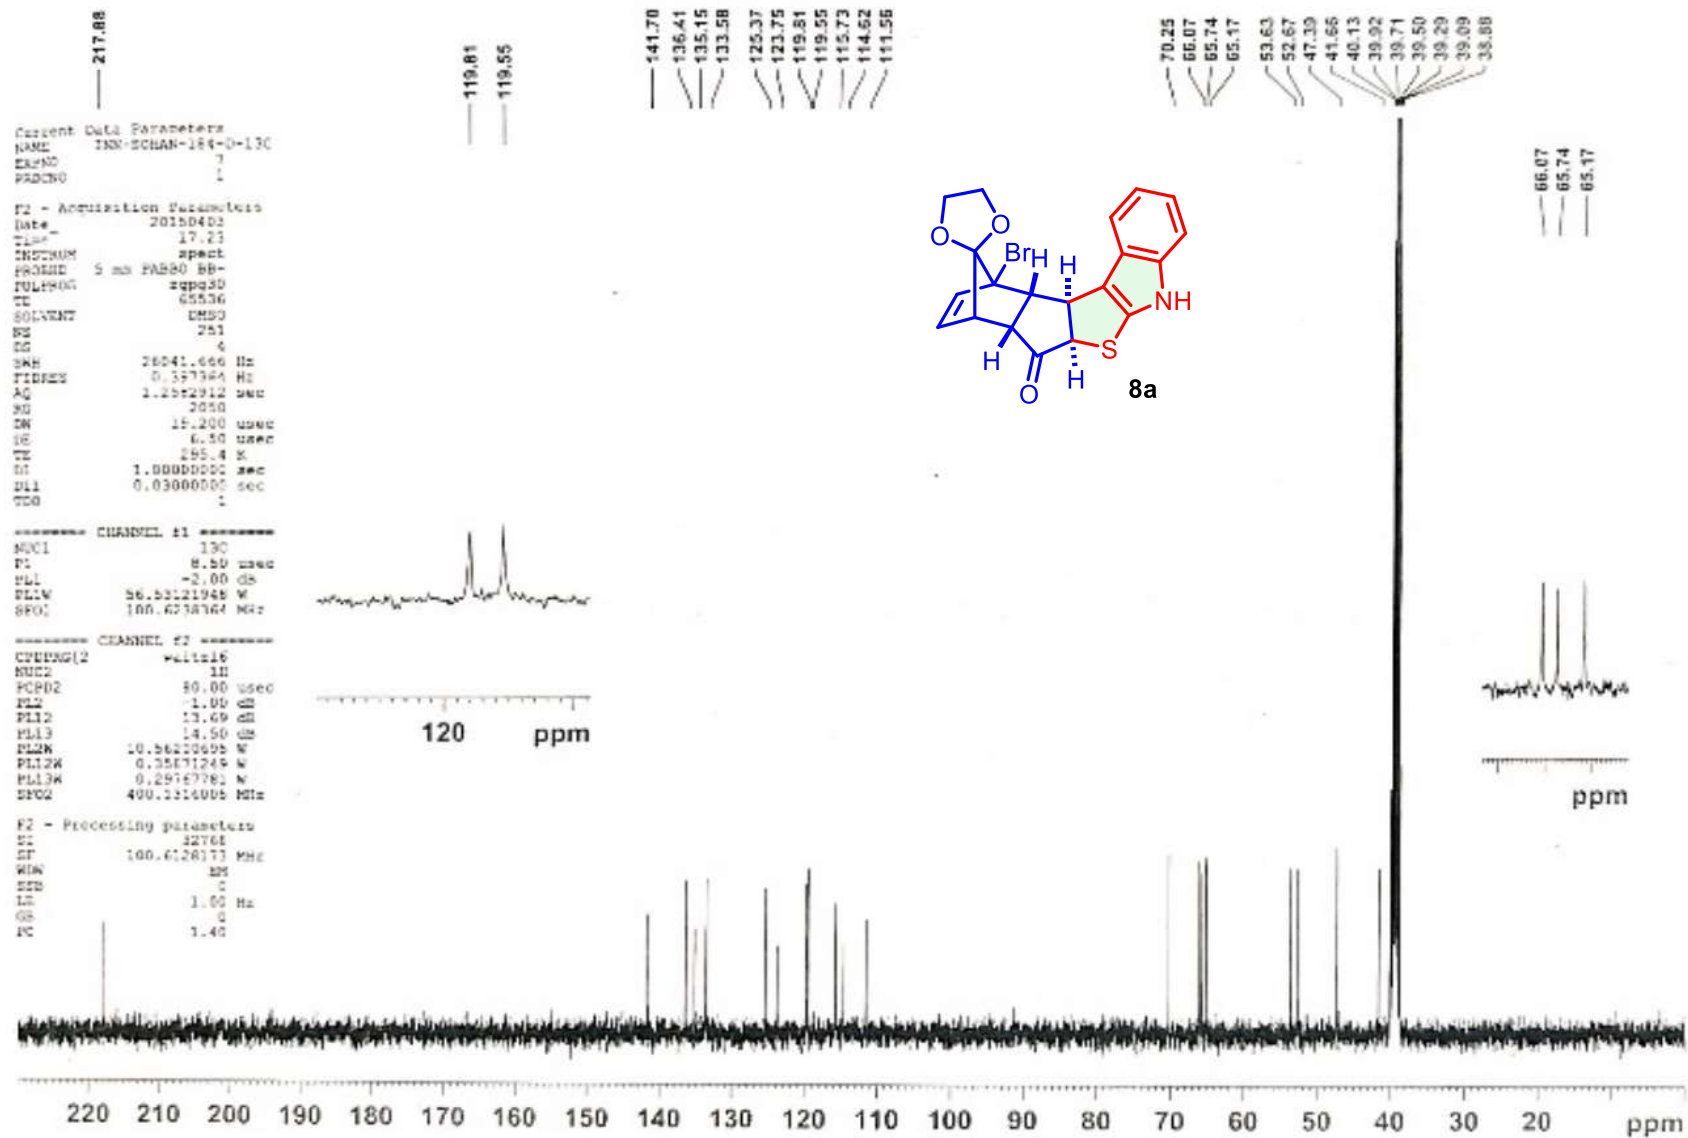

Figure S43. <sup>13</sup>C NMR of compound **8a**

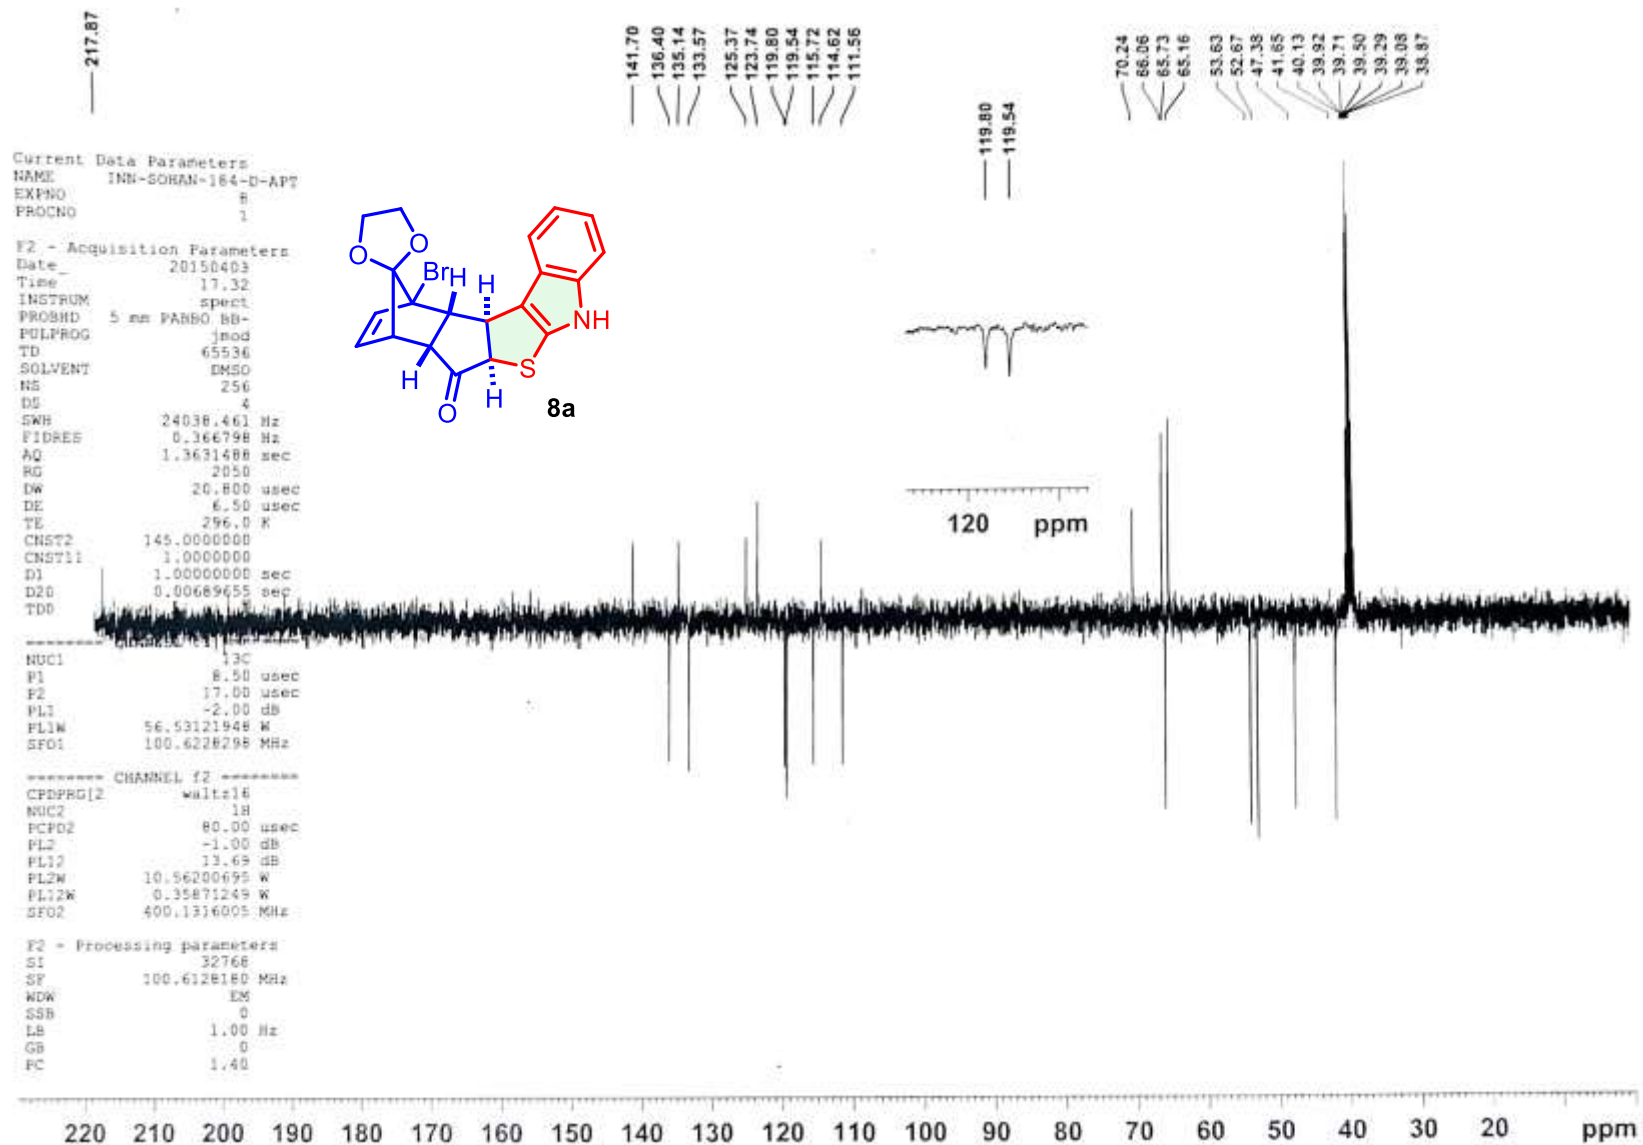

Figure S44. <sup>13</sup>C-APT NMR of compound 8a

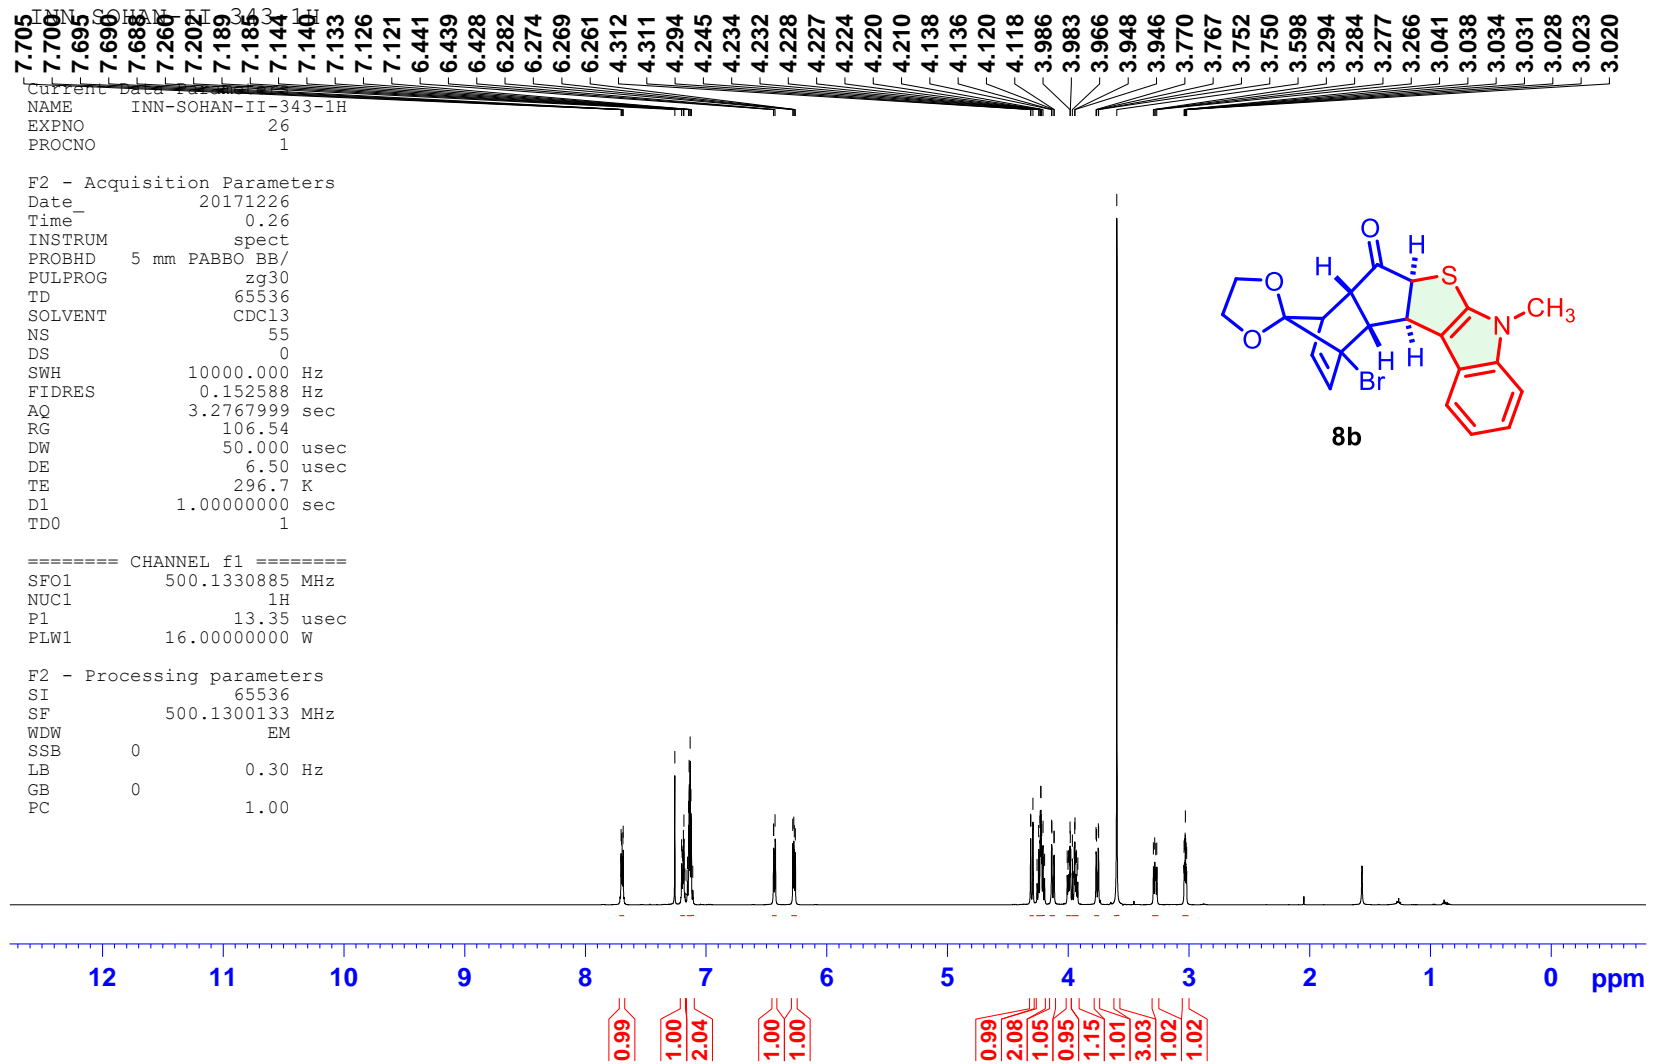

Figure S45. <sup>1</sup>H NMR of compound **8b**

INN-SOHAN-II-343-13C

Current Data Parameters  
NAME INN-SOHAN-II-343-13C  
EXPNO 27  
PROCNO 1

F2 - Acquisition Parameters  
Date\_ 20171226  
Time\_ 0.33  
INSTRUM spect  
PROBHD 5 mm PABBO BB/  
PULPROG zgpg30  
TD 65536  
SOLVENT CDCl3  
NS 1500  
DS 0  
SWH 33333.332 Hz  
FIDRES 0.508626 Hz  
AQ 0.9830400 sec  
RG 197.27  
DW 15.000 usec  
DE 6.50 usec  
TE 297.4 K  
D1 1.00000000 sec  
D11 0.03000000 sec  
TD0 1

==== CHANNEL f1 =====  
SFO1 125.7716224 MHz  
NUC1 13C  
P1 8.90 usec  
PLW1 103.00000000 W

==== CHANNEL f2 =====  
SFO2 500.1320005 MHz  
NUC2 1H  
CPDPRG[2] waltz16  
PCPD2 80.00 usec  
PLW2 16.00000000 W  
PLW12 0.44556001 W  
PLW13 0.22411001 W

F2 - Processing parameters  
SI 32768  
SF 125.7577688 MHz  
WDW EM  
SSB 0  
LB 1.00 Hz  
GB 0  
PC 1.40

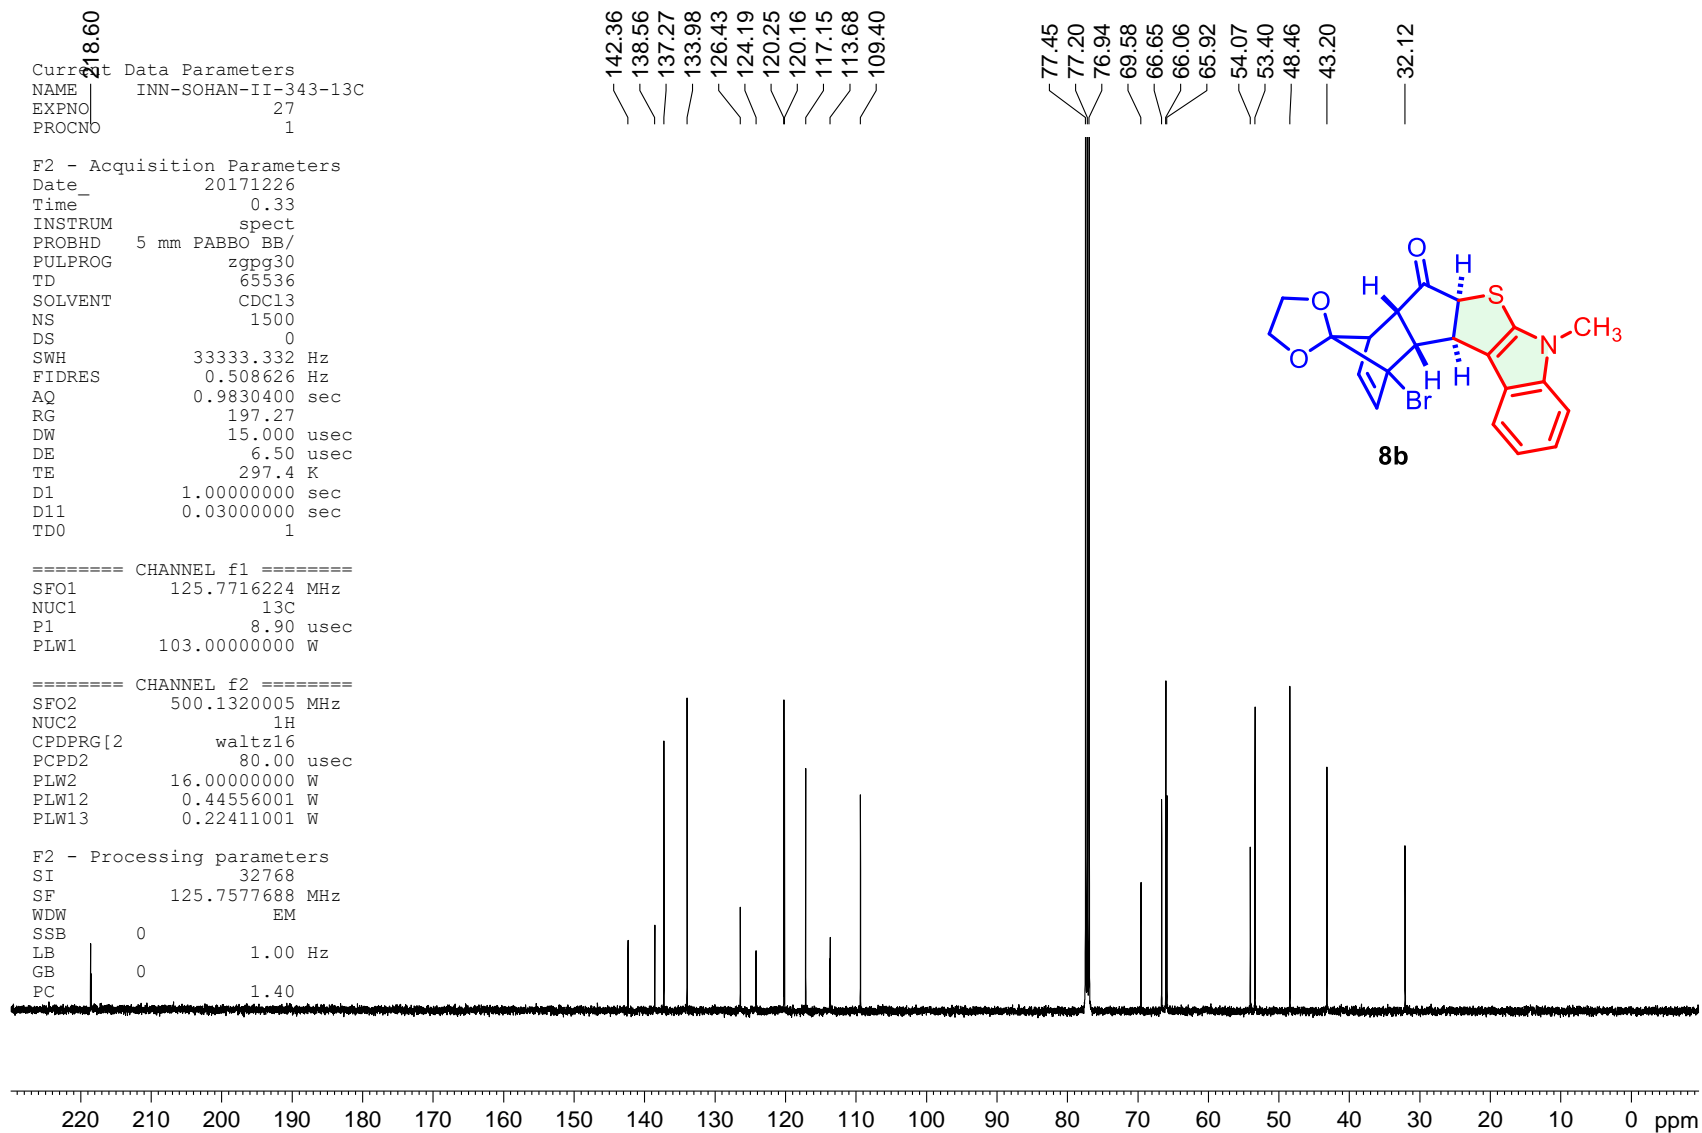

Figure S46. <sup>13</sup>C NMR of compound 8b

INN-SOCHAN-II-343-APT

Current Data Parameters  
NAME INN-SOCHAN-II-343-APT  
EXPNO 28  
PROCNO 1

F2 - Acquisition Parameters

Date\_ 20171226  
Time 1.56  
INSTRUM spect  
PROBHD 5 mm PABBO BB/  
PULPROG jmod  
TD 65536  
SOLVENT CDCl3  
NS 1024  
DS 0  
SWH 33333.332 Hz  
FIDRES 0.508626 Hz  
AQ 0.9830400 sec  
RG 197.27  
DW 15.000 usec  
DE 6.50 usec  
TE 298.6 K  
CNST2 145.0000000  
CNST11 1.0000000  
D1 1.00000000 sec  
D20 0.00689655 sec

==== CHANNEL f1 =====  
SFO1 125.7716224 MHz  
NUC1 13C  
P1 8.90 usec  
P2 17.80 usec  
PLW1 103.00000000 W

==== CHANNEL f2 =====  
SFO2 500.1320005 MHz  
NUC2 1H  
CPDPRG[2] waltz16  
PCPD2 80.00 usec  
PLW2 16.00000000 W  
PLW12 0.44556001 W

F2 - Processing parameters  
SI 32768  
SF 125.7577666 MHz  
WDW EM  
SSB 0  
LB 1.00 Hz  
GB 0  
PC 1.40

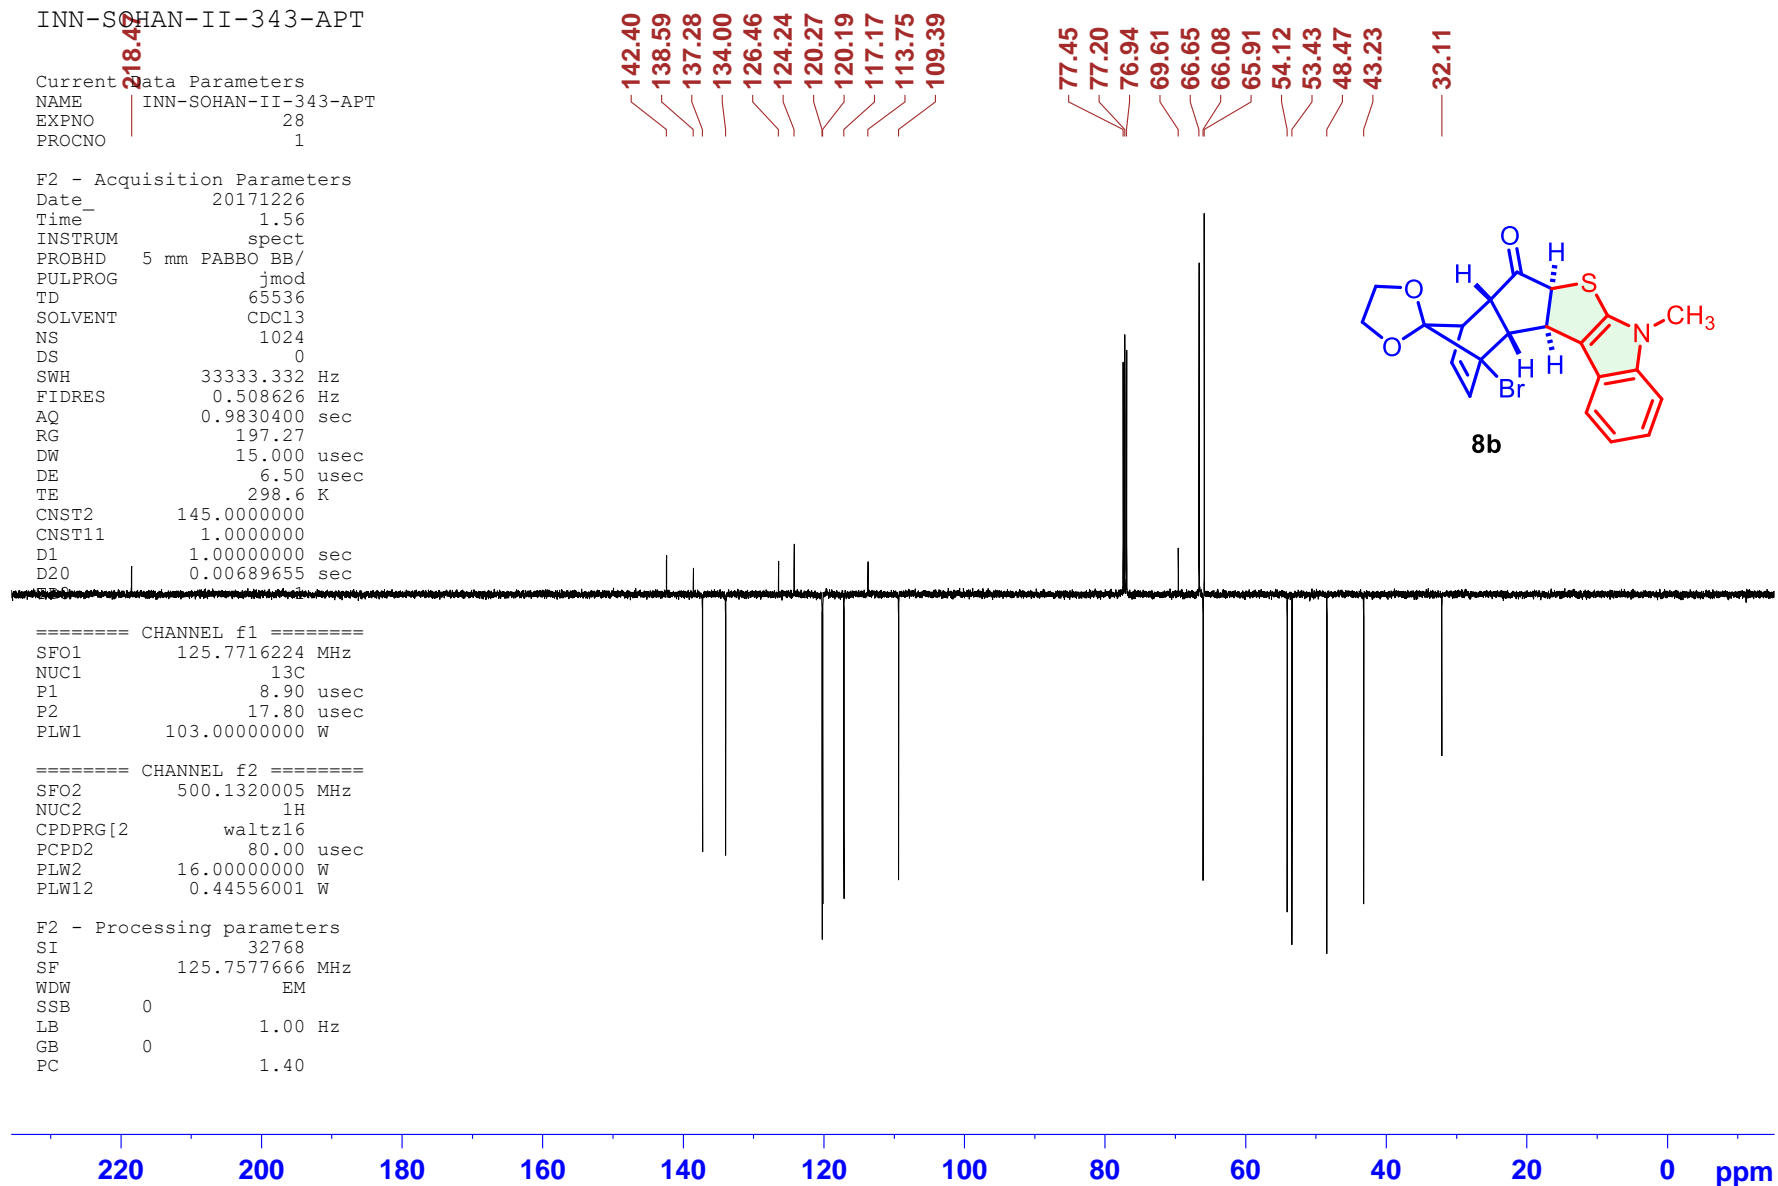

Figure S47. <sup>13</sup>C-APT NMR of compound 8b

Current Data Parameters  
NAME INN-DOHAH-II-343-COSY  
EXPTNO 3  
PROCNO 1

F2 - Acquisition Parameters  
Date\_ 20171227  
Time 14.57  
INSTRUM spect  
PROBHD 5 mm YAGBO BH-  
PULPROG cosyppqf  
TD 2048  
SOLVENT CDCl3  
NS 16  
DS 0  
SWH 2419.355 Hz  
FIDRES 1.181326 Hz  
AQ 0.4232533 sec  
RG 640  
DM 206.687 usec  
DE 6.50 usec  
TE 294.4 K  
D0 0.00000300 sec  
D1 1.00000000 sec  
D12 0.00000400 sec  
D16 0.00020000 sec  
IN0 0.00041333 sec

----- CHANNEL f1 -----  
NUC1 1H  
PC 14.75 usec  
PI 14.75 usec  
PL1 -1.00 dB  
PS1W 10.56200695 W  
SFO1 400.1300833 MHz

----- GRADIENT CHANNEL -----  
GRAM(1) SINE.100  
SP2 10.00 1  
P16 1000.00 usec

F1 - Acquisition parameters  
TD 256  
SFO1 400.1321 MHz  
FIDRES 18.901239 Hz  
SW 6.046 ppm  
FMODE CF

F2 - Processing parameters  
SI 2048  
SF 400.1300099 MHz  
WDW SINC  
SSB 0  
LB 0 Hz  
GB 0  
PC 1.40

F1 - Processing parameters  
SI 512  
MC2 CF  
SF 400.1300099 MHz  
WDW SINC  
SSB 0  
LB 0 Hz  
GB 0

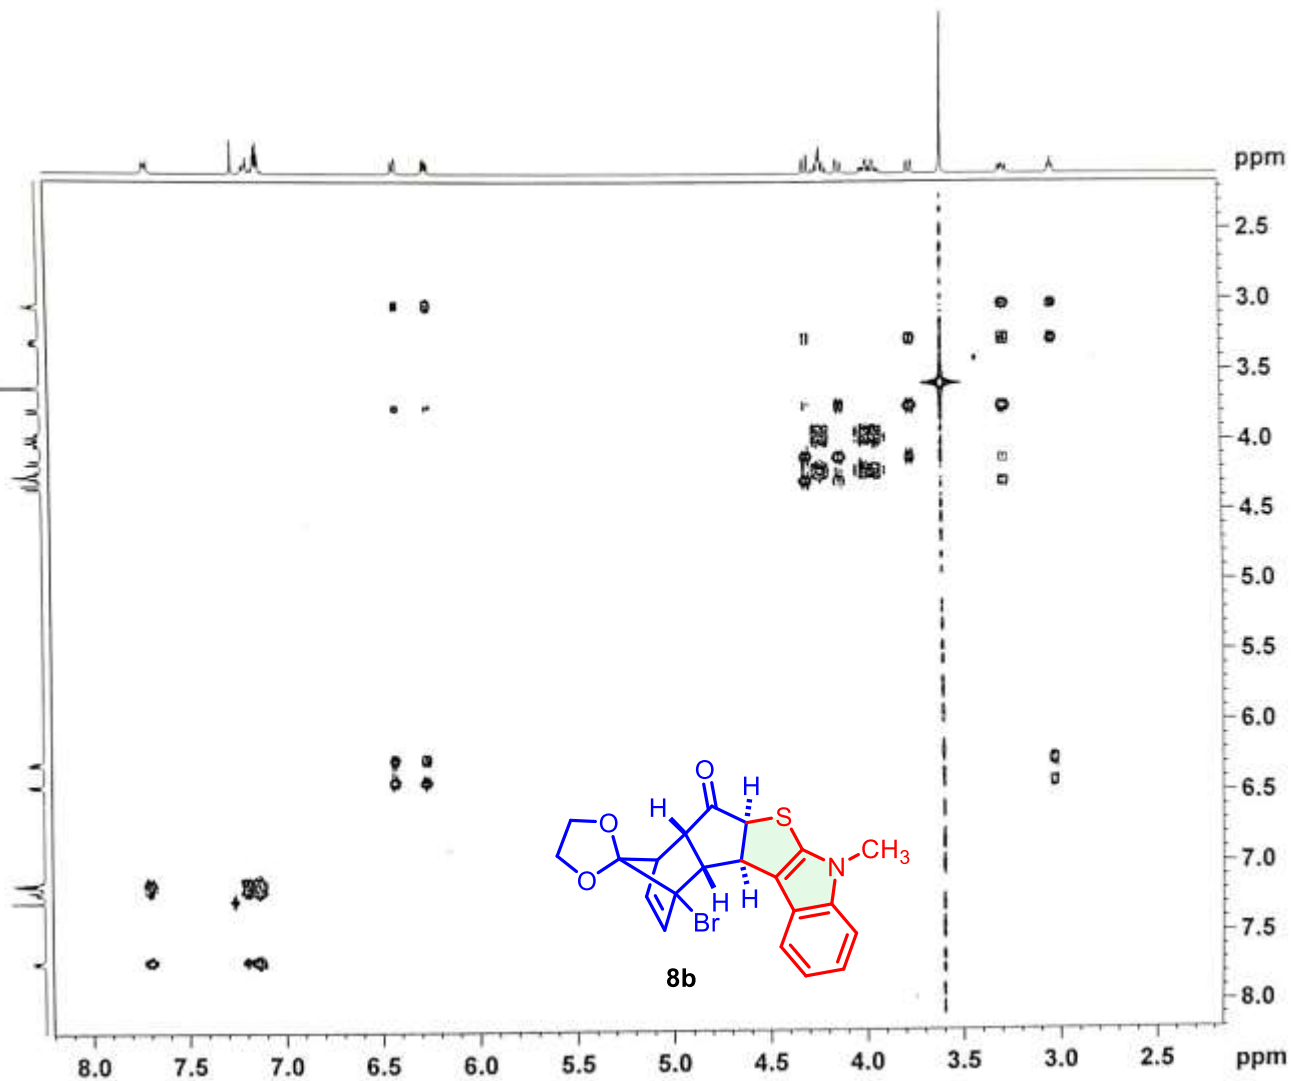







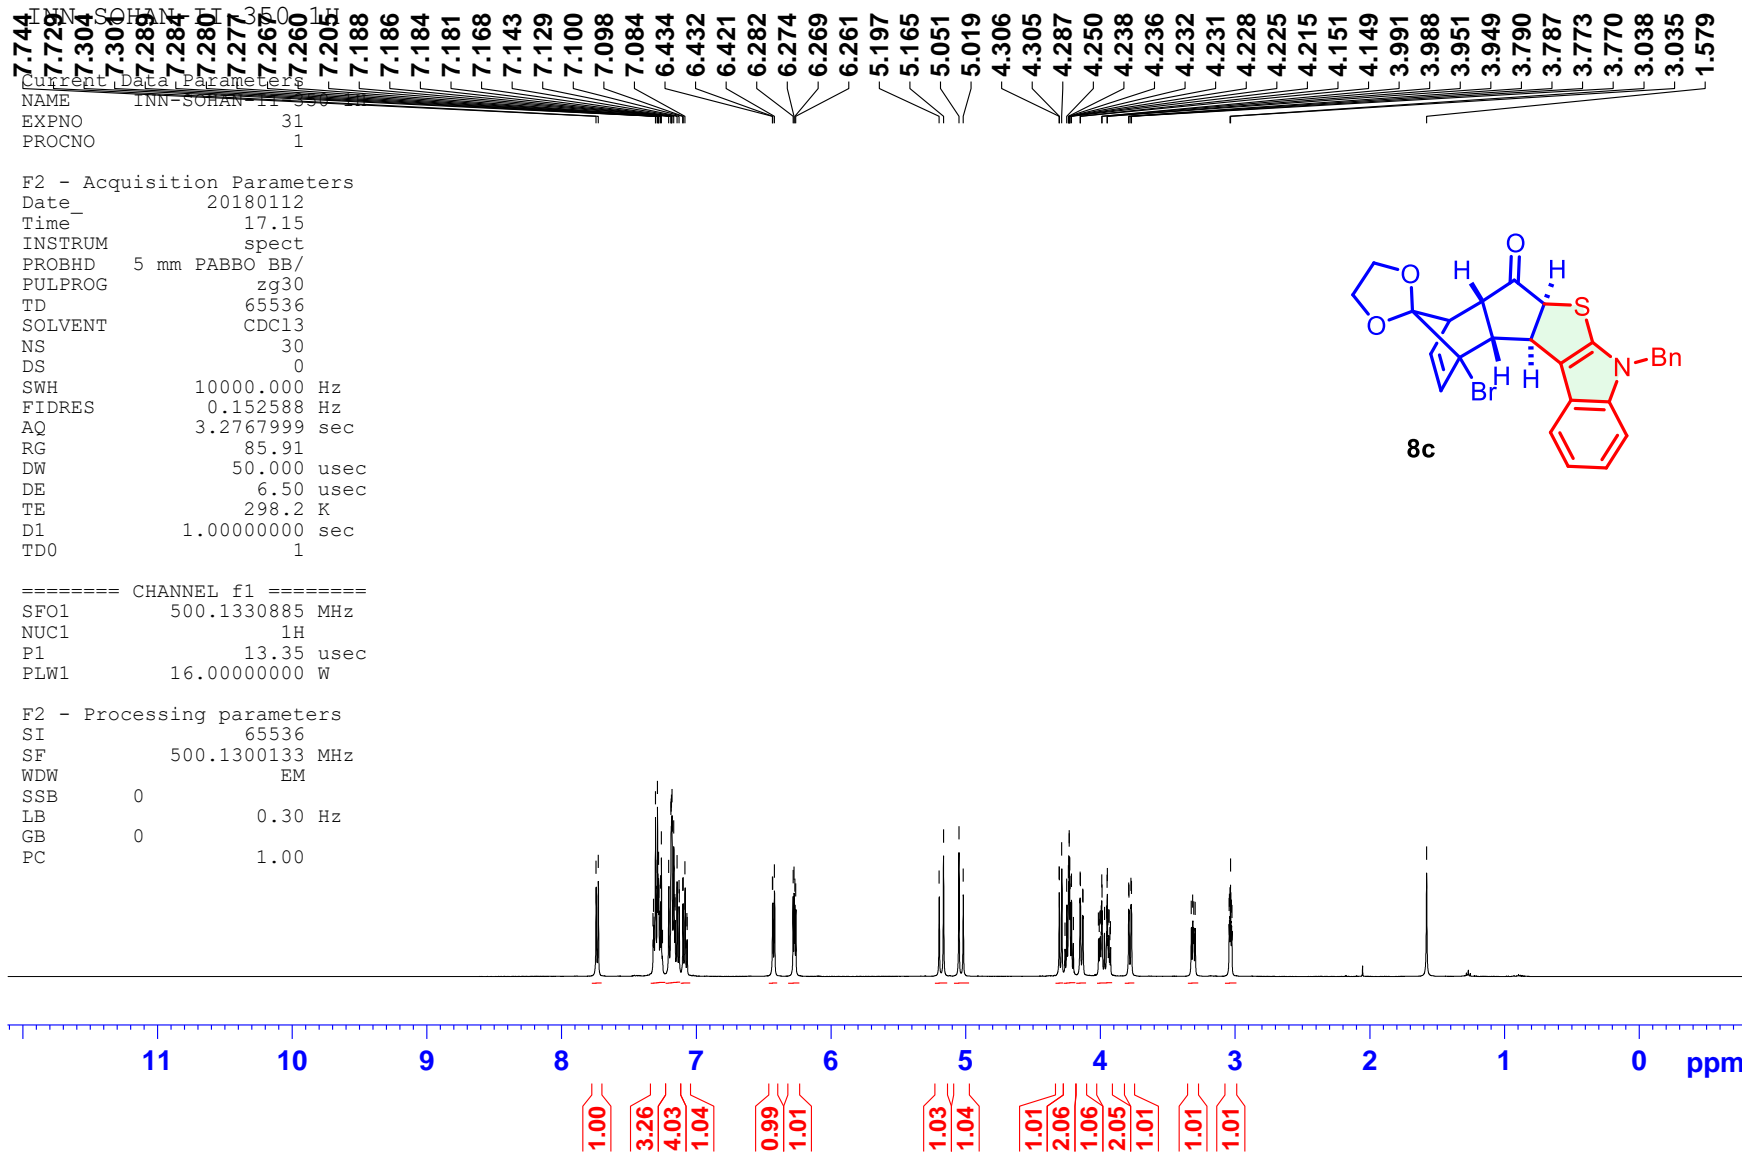

Figure S50. <sup>1</sup>H NMR of compound 8c

INN-SOCHAN-II-350-13C

Current Data Parameters  
NAME INN-SOCHAN-II-350-13C  
EXPNO 32  
PROCNO 1

F2 - Acquisition Parameters  
Date\_ 20180112  
Time\_ 17.17  
INSTRUM spect  
PROBHD 5 mm PABBO BB/  
PULPROG zgpg30  
TD 65536  
SOLVENT CDC13  
NS 414  
DS 0  
SWH 33333.332 Hz  
FIDRES 0.508626 Hz  
AQ 0.9830400 sec  
RG 197.27  
DW 15.000 usec  
DE 6.50 usec  
TE 298.8 K  
D1 1.00000000 sec  
D11 0.03000000 sec  
TD0 1

===== CHANNEL f1 =====  
SF01 125.7716224 MHz  
NUC1 13C  
P1 8.90 usec  
PLW1 103.00000000 W

===== CHANNEL f2 =====  
SF02 500.1320005 MHz  
NUC2 1H  
CPDPRG[2] waltz16  
PCPD2 80.00 usec  
PLW2 16.00000000 W  
PLW12 0.44556001 W  
PLW13 0.22411001 W

F2 - Processing parameters  
SI 32768  
SF 125.7577713 MHz  
WDW EM  
SSB 0  
LB 1.00 Hz  
GB 0  
PC 1.40

141.95  
138.18  
137.19  
136.44  
134.02  
128.98  
128.08  
127.49  
126.42  
124.41  
120.45  
120.38  
117.27  
114.56  
109.93

77.45  
77.20  
76.94  
69.60  
66.63  
66.24  
65.90  
54.04  
53.43  
49.72  
48.42  
43.06

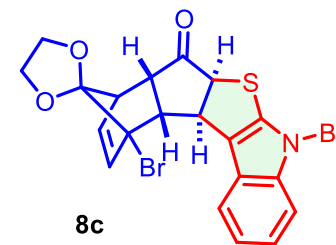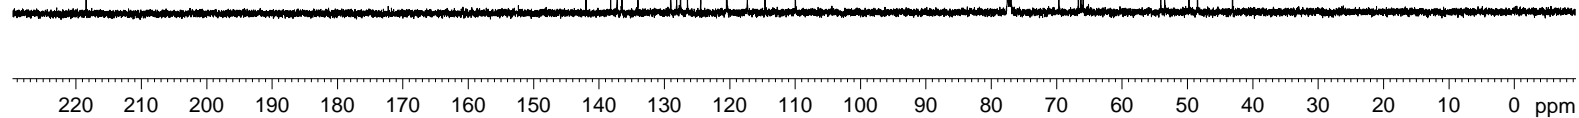

Figure S51. <sup>13</sup>C NMR of compound 8c

INN-SOHAN-II-350-APT

Current Data Parameters  
NAME INN-SOHAN-II-350-APT  
EXPNO 33  
PROCNO 1

F2 - Acquisition Parameters  
Date\_ 20180112  
Time\_ 17.29  
INSTRUM spect  
PROBHD 5 mm PABBO BB/  
PULPROG jmod  
TD 65536  
SOLVENT CDC13  
NS 265  
DS 0  
SWH 33333.332 Hz  
FIDRES 0.508626 Hz  
AQ 0.9830400 sec  
RG 197.27  
DW 15.000 usec  
DE 6.50 usec  
TE 298.9 K  
CNST2 145.0000000  
CNST11 1.0000000  
D1 1.00000000 sec  
D20 0.00689655 sec  
TDO 1

===== CHANNEL f1 =====  
SFO1 125.7716224 MHz  
NUC1 13C  
P1 8.90 usec  
P2 17.80 usec  
PLW1 103.00000000 W

===== CHANNEL f2 =====  
SFO2 500.1320005 MHz  
NUC2 1H  
CPDPRG[2] waltz16  
PCPD2 80.00 usec  
PLW2 16.00000000 W  
PLW12 0.44556001 W

F2 - Processing parameters  
SI 32768  
SF 125.7577706 MHz  
WDW EM  
SSB 0  
LB 1.00 Hz  
GB 0  
PC 1.40

141.96  
138.19  
137.19  
136.45  
134.02  
128.98  
128.09  
127.49  
126.43  
124.42  
120.46  
120.38  
117.27  
114.56  
109.94  
77.45  
77.20  
76.94  
69.61  
66.63  
66.25  
65.90  
54.04  
53.43  
49.72  
48.42  
43.07

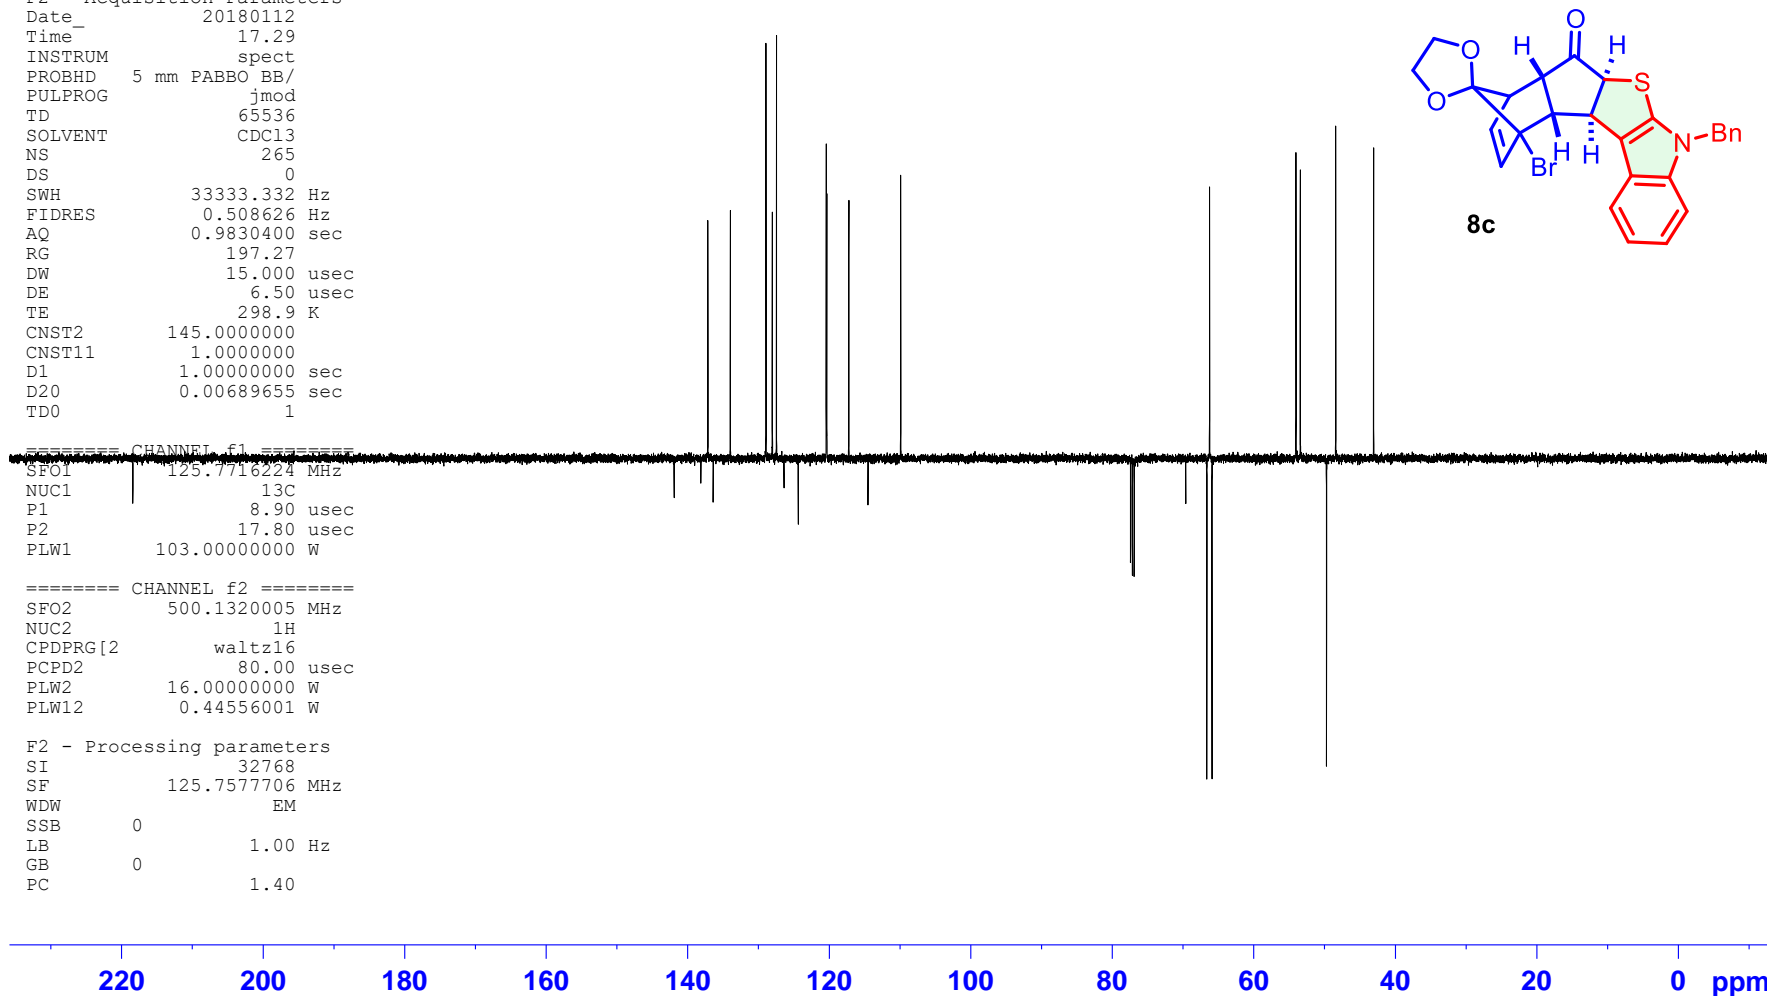

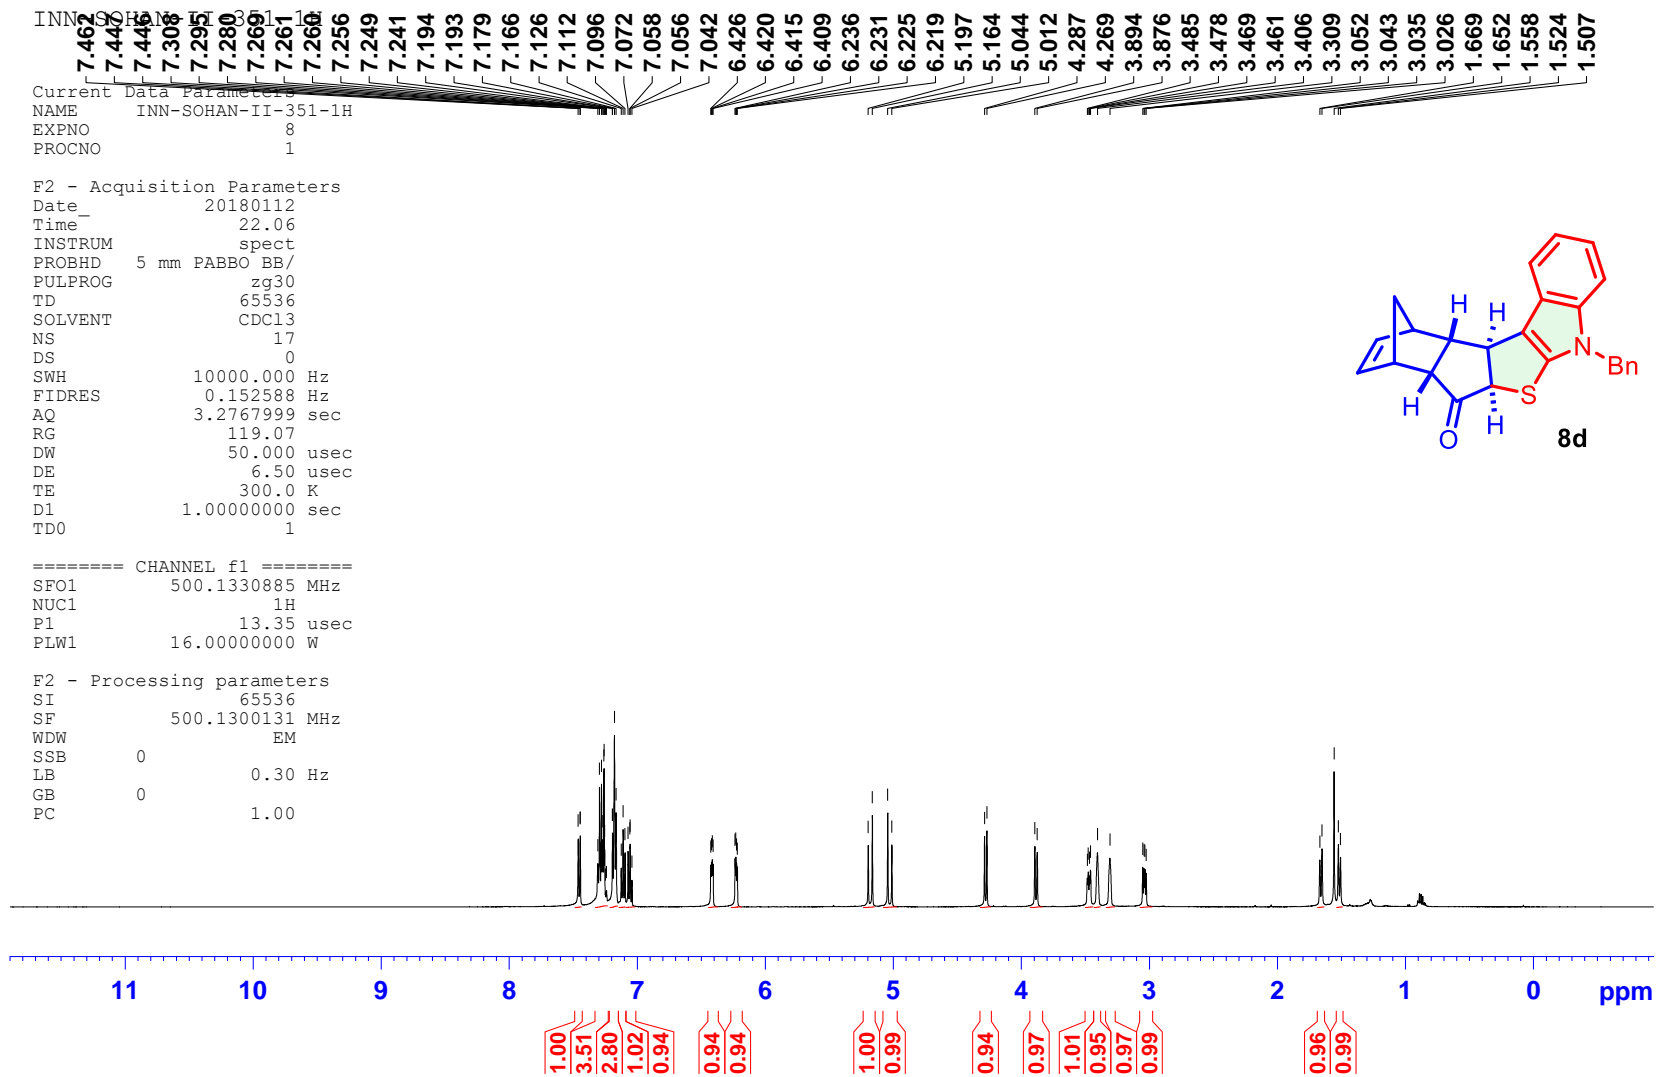

Figure S53. <sup>1</sup>H NMR of compound 8d

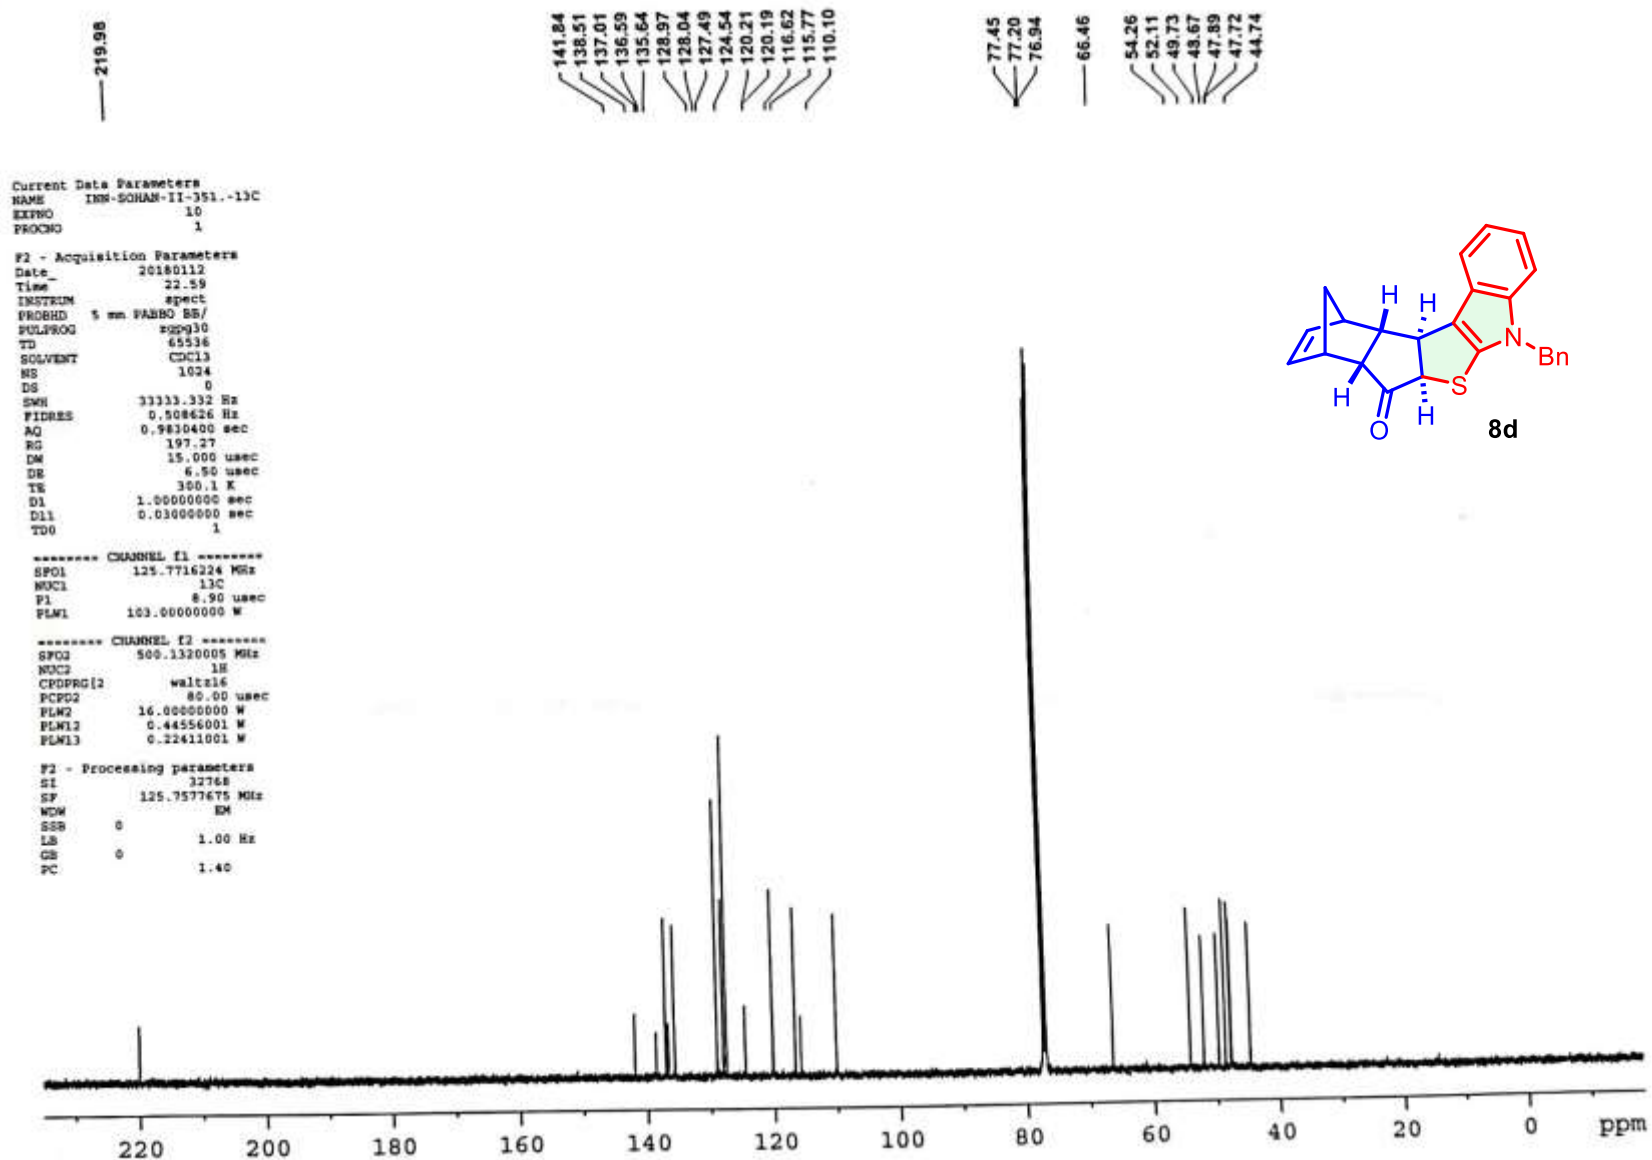

Figure S54. <sup>13</sup>C NMR of compound 8d

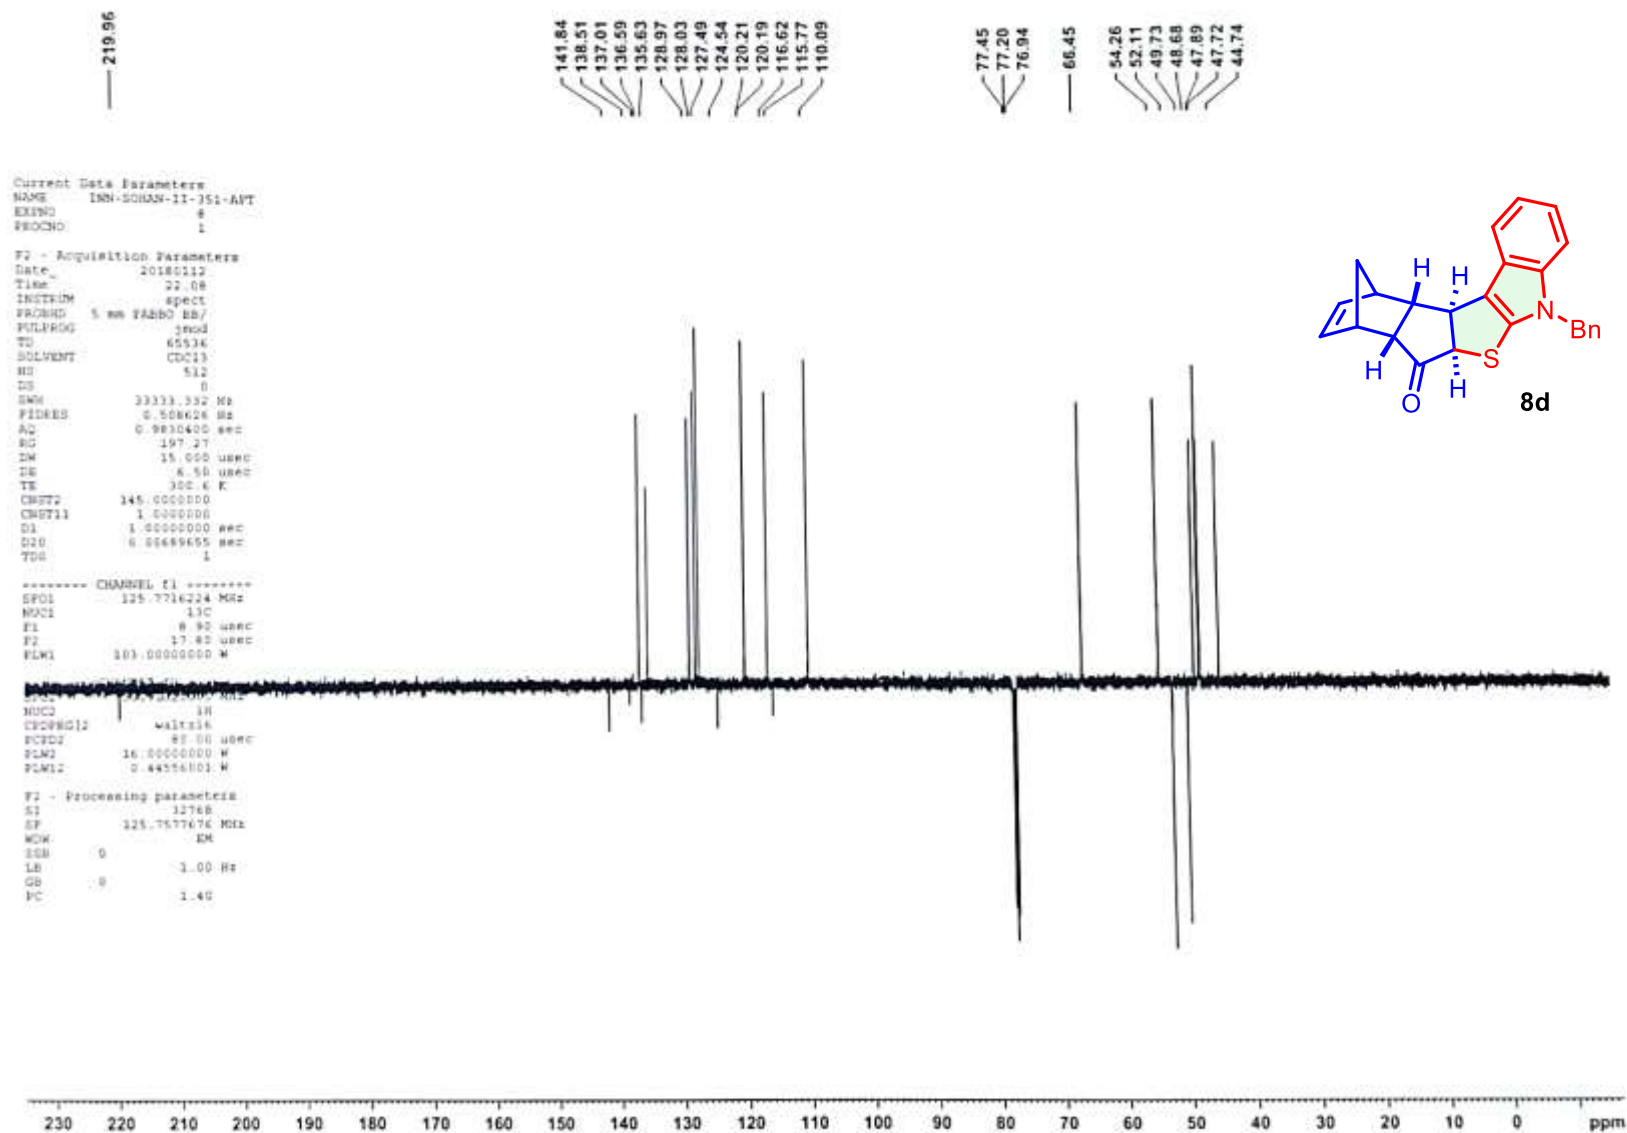

Figure S55. <sup>13</sup>C-APT NMR of compound 8d

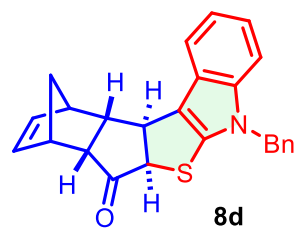

```

Current Data Parameters
NAME: INN-82448-11-101-COSY
EXPNO: 4
PROCNO: 1

F2 - Acquisition Parameters
Date_ : 20100114
Time: 11.26
INSTRUM: spect
PROBHD: 5 mm TANGO BB/
PULPROG: zgpg30
TD: 6548
SOLVENT: CDCl3
NS: 32
DS: 0
SWH: 3388.821 Hz
FIDRES: 1.751247 Hz
AQ: 0.2854932 sec
RG: 197.17
IN: 330.400 MHz
DE: 4.00 MHz
TE: 300.0 K
D0: 0.0002000 sec
D1: 1.2000000 sec
d11: 0.0000000 sec
d12: 0.0000000 sec
d13: 0.0000000 sec
d14: 0.0000000 sec
d15: 0.0002000 sec
d16: 0.0002000 sec
d17: 0.0002000 sec
----- CHANNEL f1 -----
SFO1: 500.1323609 MHz
NUC1: 1H
P1: 13.00 MHz
P2: 13.00 MHz
PCY: 2500.00 MHz
TIM1: 14.0000000 W
FAM1B: 3.3680000 W
----- CHANNEL f2 -----
CHAN(f2): 500.1323609 MHz
CPC1: 18.00 MHz
P1c: 1000.00 MHz
F1 - Acquisition parameters
TD: 6548
SFO1: 500.1323609 MHz
FIDRES: 1.751247 Hz
IN: 330.400 MHz
PULPROG: zgpg30
F2 - Processing parameters
SI: 32768
SF: 500.1323609 MHz
WDW: EM
GB: 0
LB: 0 Hz
GB: 0
PC: 1.40
F3 - Processing parameters
SI: 1324
SF: 500.1323609 MHz
WDW: EM
GB: 0
LB: 0 Hz
GB: 0

```

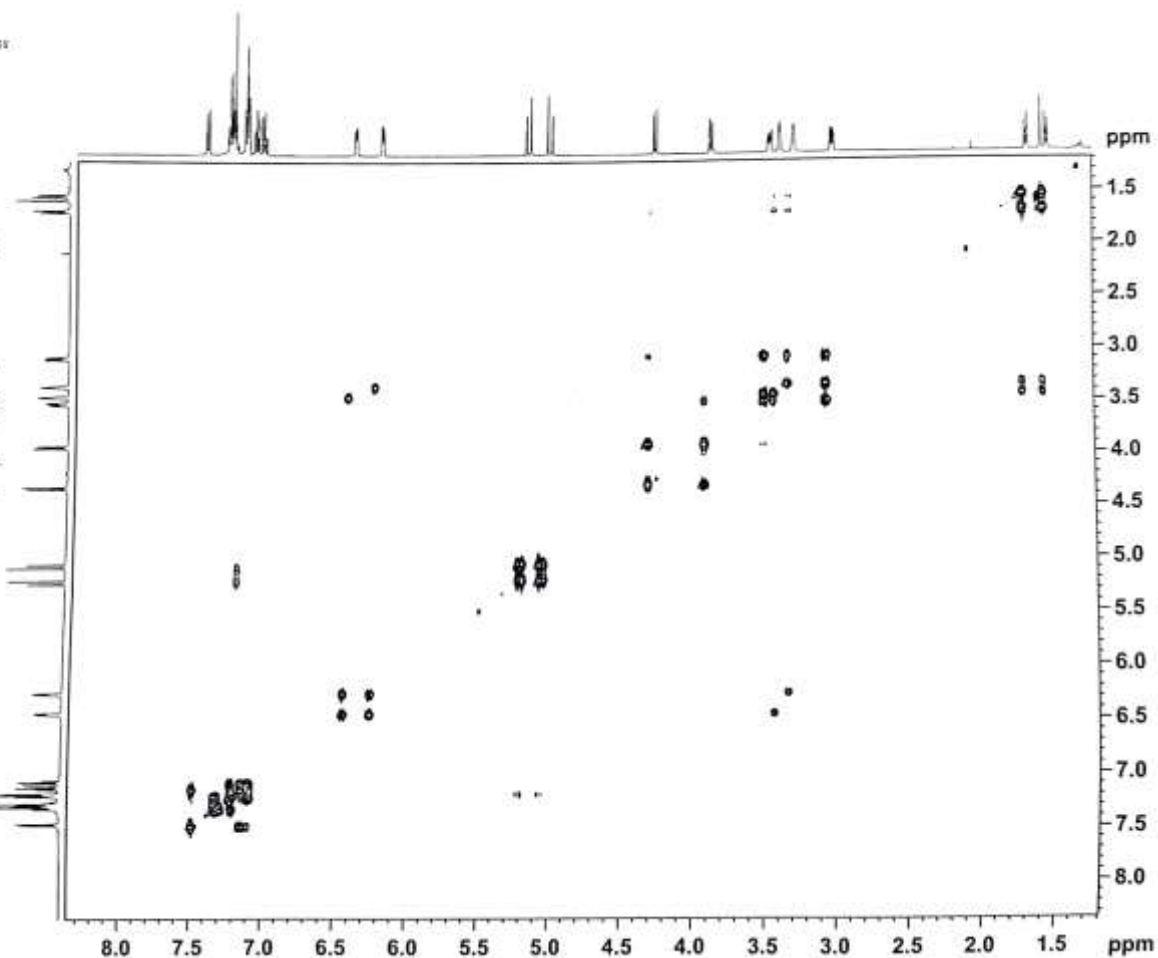

Figure S56.  $^1\text{H}$ - $^1\text{H}$  COSY NMR of compound 8d

**Table S1. Crystal data and structure refinement for CCDC 1974406 (3f)**

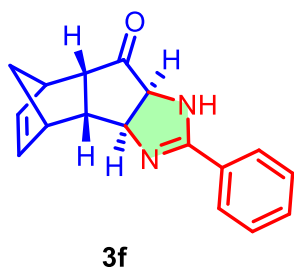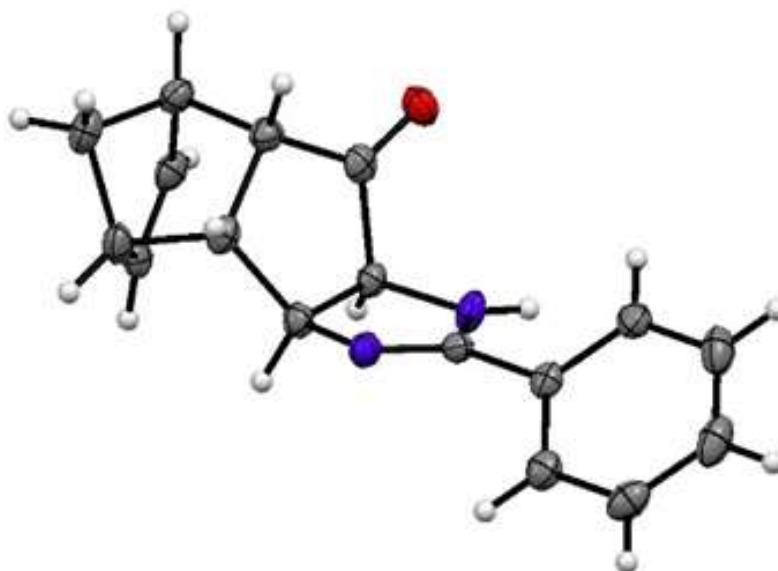

|                                             |                                                               |
|---------------------------------------------|---------------------------------------------------------------|
| Identification code                         | INN-SOHAN-II-29                                               |
| Empirical formula                           | C <sub>17</sub> H <sub>16</sub> N <sub>2</sub> O              |
| Formula weight                              | 264.32                                                        |
| Temperature/K                               | 150                                                           |
| Crystal system                              | orthorhombic                                                  |
| Space group                                 | P2 <sub>1</sub> 2 <sub>1</sub> 2 <sub>1</sub>                 |
| a/Å                                         | 9.5078(8)                                                     |
| b/Å                                         | 11.2634(9)                                                    |
| c/Å                                         | 12.0926(10)                                                   |
| α/°                                         | 90                                                            |
| β/°                                         | 90                                                            |
| γ/°                                         | 90                                                            |
| Volume/Å <sup>3</sup>                       | 1295.00(18)                                                   |
| Z                                           | 4                                                             |
| ρ <sub>calc</sub> /cm <sup>3</sup>          | 1.356                                                         |
| μ/mm <sup>-1</sup>                          | 0.086                                                         |
| F(000)                                      | 560.0                                                         |
| Crystal size/mm <sup>3</sup>                | 0.223 × 0.126 × 0.102                                         |
| Radiation                                   | MoKα (λ = 0.71073)                                            |
| 2θ range for data collection/°              | 4.942 to 49.986                                               |
| Index ranges                                | -8 ≤ h ≤ 11, -13 ≤ k ≤ 7, -14 ≤ l ≤ 14                        |
| Reflections collected                       | 7151                                                          |
| Independent reflections                     | 2283 [R <sub>int</sub> = 0.0540, R <sub>sigma</sub> = 0.0551] |
| Data/restraints/parameters                  | 2283/0/181                                                    |
| Goodness-of-fit on F <sup>2</sup>           | 1.074                                                         |
| Final R indexes [I ≥ 2σ (I)]                | R <sub>1</sub> = 0.0441, wR <sub>2</sub> = 0.0942             |
| Final R indexes [all data]                  | R <sub>1</sub> = 0.0532, wR <sub>2</sub> = 0.1008             |
| Largest diff. peak/hole / e Å <sup>-3</sup> | 0.21/-0.20                                                    |

**Table S2. Crystal data and structure refinement for CCDC 2530978 (4)**

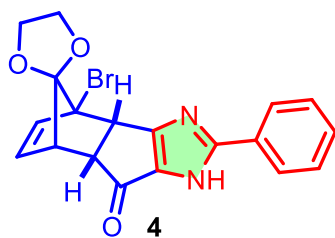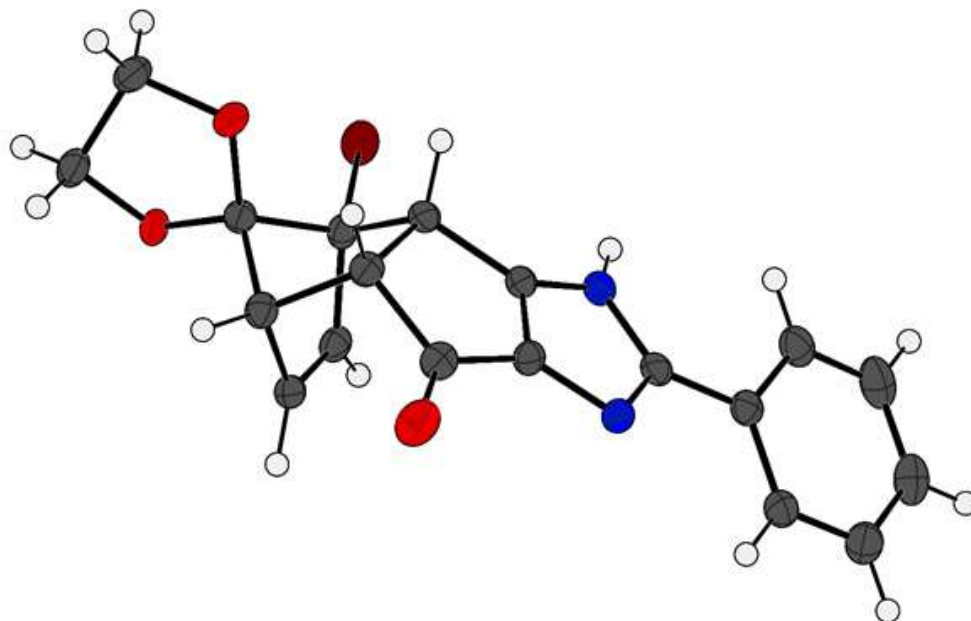

|                                             |                                                                   |
|---------------------------------------------|-------------------------------------------------------------------|
| Identification code                         | INN_TGL_04_56_autored                                             |
| Empirical formula                           | C <sub>21</sub> H <sub>21</sub> BrN <sub>2</sub> O <sub>4</sub> S |
| Formula weight                              | 477.37                                                            |
| Temperature/K                               | 150.00(10)                                                        |
| Crystal system                              | triclinic                                                         |
| Space group                                 | P-1                                                               |
| a/Å                                         | 9.4144(4)                                                         |
| b/Å                                         | 9.5780(4)                                                         |
| c/Å                                         | 12.3679(5)                                                        |
| α/°                                         | 111.479(4)                                                        |
| β/°                                         | 95.220(3)                                                         |
| γ/°                                         | 101.940(3)                                                        |
| Volume/Å <sup>3</sup>                       | 998.15(8)                                                         |
| Z                                           | 2                                                                 |
| ρ <sub>calc</sub> /cm <sup>3</sup>          | 1.588                                                             |
| μ/mm <sup>-1</sup>                          | 2.195                                                             |
| F(000)                                      | 488.0                                                             |
| Crystal size/mm <sup>3</sup>                | 0.15 × 0.13 × 0.11                                                |
| Radiation                                   | Mo Kα (λ = 0.71073)                                               |
| 2θ range for data collection/°              | 3.6 to 49.988                                                     |
| Index ranges                                | -11 ≤ h ≤ 11, -11 ≤ k ≤ 11, -14 ≤ l ≤ 14                          |
| Reflections collected                       | 35607                                                             |
| Independent reflections                     | 3515 [R <sub>int</sub> = 0.0999, R <sub>sigma</sub> = 0.0375]     |
| Data/restraints/parameters                  | 3515/0/227                                                        |
| Goodness-of-fit on F <sup>2</sup>           | 1.059                                                             |
| Final R indexes [I ≥ 2σ (I)]                | R <sub>1</sub> = 0.0373, wR <sub>2</sub> = 0.1003                 |
| Final R indexes [all data]                  | R <sub>1</sub> = 0.0403, wR <sub>2</sub> = 0.1031                 |
| Largest diff. peak/hole / e Å <sup>-3</sup> | 0.74/-0.77                                                        |

**Table S3. Crystal data and structure refinement for CCDC 1974453 (6a)**

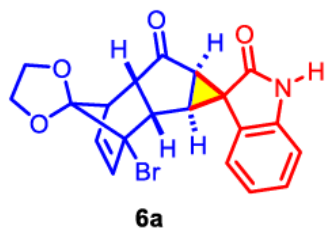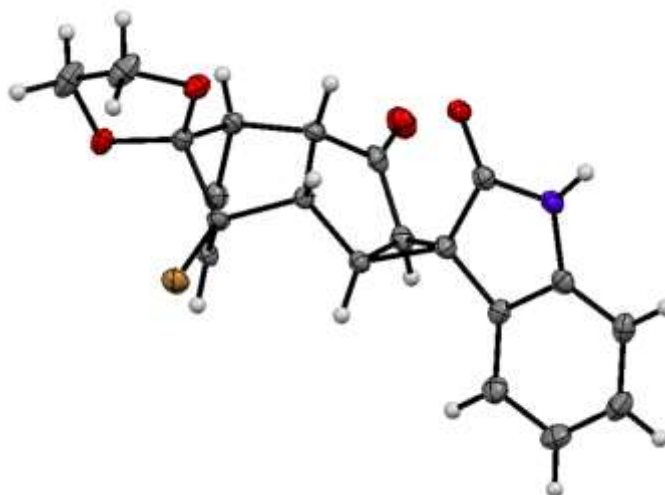

|                                             |                                                               |
|---------------------------------------------|---------------------------------------------------------------|
| Identification code                         | INN-SOHAN-II-251-B                                            |
| Empirical formula                           | C <sub>20</sub> H <sub>16</sub> BrNO <sub>4</sub>             |
| Formula weight                              | 414.25                                                        |
| Temperature/K                               | 150                                                           |
| Crystal system                              | monoclinic                                                    |
| Space group                                 | P2 <sub>1</sub> /c                                            |
| a / Å                                       | 12.1893                                                       |
| b / Å                                       | 6.7861                                                        |
| c / Å                                       | 20.6372                                                       |
| α / °                                       | 90                                                            |
| β / °                                       | 93.489                                                        |
| γ / °                                       | 90                                                            |
| Volume/Å <sup>3</sup>                       | 1703.90                                                       |
| Z                                           | 4                                                             |
| ρ <sub>calc</sub> g/cm <sup>3</sup>         | 1.615                                                         |
| μ / mm <sup>-1</sup>                        | 2.439                                                         |
| F(000)                                      | 840.0                                                         |
| Crystal size/mm <sup>3</sup>                | 0.207 × 0.12 × 0.04                                           |
| Radiation                                   | MoKα (λ = 0.71073)                                            |
| 2θ range for data collection                | 5.024 to 49.99°                                               |
| Index ranges                                | -14 ≤ h ≤ 14, -8 ≤ k ≤ 6, -23 ≤ l ≤ 24                        |
| Reflections collected                       | 14616                                                         |
| Independent reflections                     | 2997 [R <sub>int</sub> = 0.0562, R <sub>sigma</sub> = 0.0378] |
| Data/restraints/parameters                  | 2997/0/235                                                    |
| Goodness-of-fit on F <sup>2</sup>           | 1.044                                                         |
| Final R indexes [I ≥ 2σ (I)]                | R <sub>1</sub> = 0.0328, wR <sub>2</sub> = 0.0717             |
| Final R indexes [all data]                  | R <sub>1</sub> = 0.0400, wR <sub>2</sub> = 0.0756             |
| Largest diff. peak/hole / e Å <sup>-3</sup> | 0.36/-0.41                                                    |

**Table S4. Crystal data and structure refinement for CCDC 1974434 (6d)**

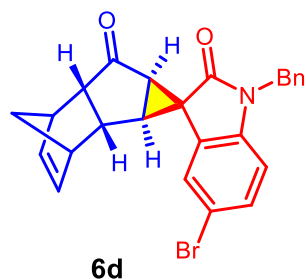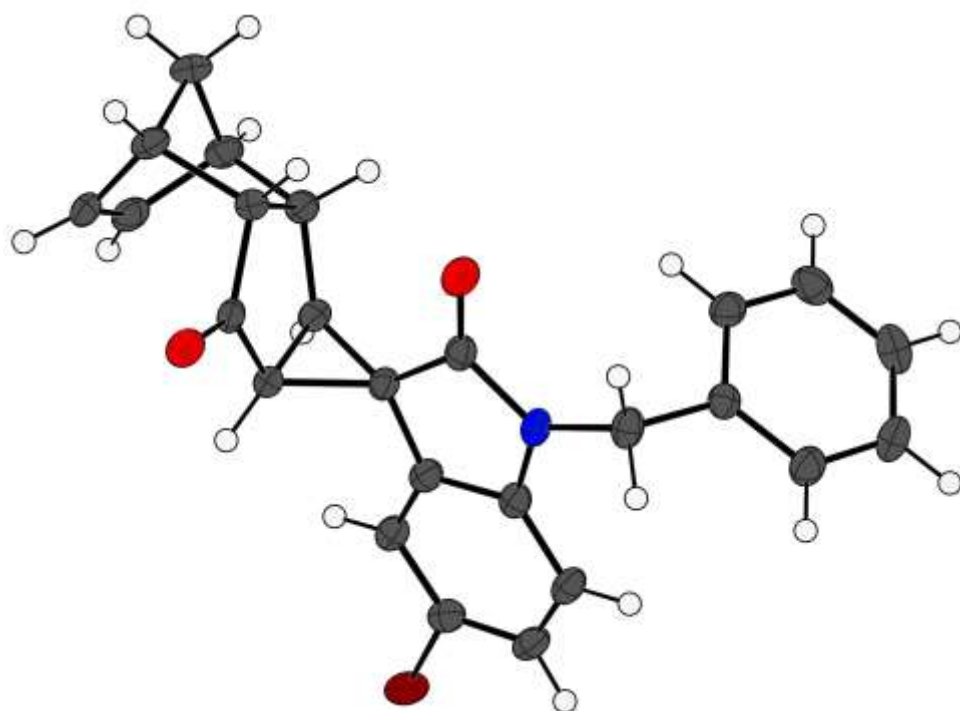

|                                             |                                                               |
|---------------------------------------------|---------------------------------------------------------------|
| Identification code                         | INN-SOHAN-II-300                                              |
| Empirical formula                           | C <sub>25</sub> H <sub>20</sub> BrNO <sub>2</sub>             |
| Formula weight                              | 446.33                                                        |
| Temperature/K                               | 150                                                           |
| Crystal system                              | triclinic                                                     |
| Space group                                 | P-1                                                           |
| a/Å                                         | 8.7539(3)                                                     |
| b/Å                                         | 10.9118(4)                                                    |
| c/Å                                         | 12.2664(3)                                                    |
| α/°                                         | 66.662(3)                                                     |
| β/°                                         | 87.517(2)                                                     |
| γ/°                                         | 68.820(3)                                                     |
| Volume/Å <sup>3</sup>                       | 996.32(6)                                                     |
| Z                                           | 2                                                             |
| ρ <sub>calc</sub> /g/cm <sup>3</sup>        | 1.488                                                         |
| μ/mm <sup>-1</sup>                          | 2.085                                                         |
| F(000)                                      | 456.0                                                         |
| Crystal size/mm <sup>3</sup>                | 0.24 × 0.18 × 0.124                                           |
| Radiation                                   | MoKα (λ = 0.71073)                                            |
| 2θ range for data collection/°              | 5.696 to 49.986                                               |
| Index ranges                                | -10 ≤ h ≤ 8, -12 ≤ k ≤ 12, -14 ≤ l ≤ 14                       |
| Reflections collected                       | 7281                                                          |
| Independent reflections                     | 3478 [R <sub>int</sub> = 0.0667, R <sub>sigma</sub> = 0.0556] |
| Data/restraints/parameters                  | 3478/0/262                                                    |
| Goodness-of-fit on F <sup>2</sup>           | 1.062                                                         |
| Final R indexes [I ≥ 2σ (I)]                | R <sub>1</sub> = 0.0385, wR <sub>2</sub> = 0.0978             |
| Final R indexes [all data]                  | R <sub>1</sub> = 0.0438, wR <sub>2</sub> = 0.1013             |
| Largest diff. peak/hole / e Å <sup>-3</sup> | 1.41/-0.41                                                    |

Table S5. Crystal data and structure refinement for CCDC 1992116 (6e)

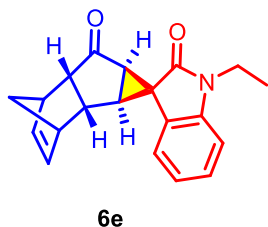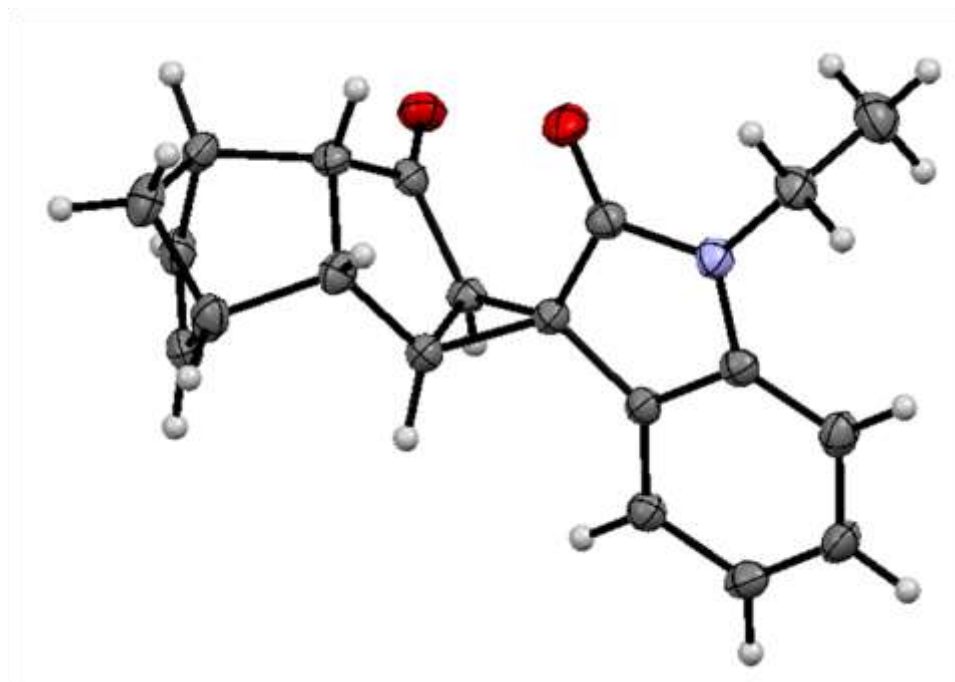

|                                             |                                                               |
|---------------------------------------------|---------------------------------------------------------------|
| Identification code                         | INN-SOHAN-II-330_Mo                                           |
| Empirical formula                           | C <sub>20</sub> H <sub>19</sub> NO <sub>2</sub>               |
| Formula weight                              | 305.379                                                       |
| Temperature/K                               | 150.00                                                        |
| Crystal system                              | triclinic                                                     |
| Space group                                 | P-1                                                           |
| a/Å                                         | 8.3696(4)                                                     |
| b/Å                                         | 9.9170(4)                                                     |
| c/Å                                         | 20.0570(9)                                                    |
| α/°                                         | 96.597(3)                                                     |
| β/°                                         | 94.003(4)                                                     |
| γ/°                                         | 112.839(4)                                                    |
| Volume/Å <sup>3</sup>                       | 1512.14(12)                                                   |
| Z                                           | 4                                                             |
| ρ <sub>calc</sub> /cm <sup>3</sup>          | 1.341                                                         |
| μ/mm <sup>-1</sup>                          | 0.086                                                         |
| F(000)                                      | 648.4                                                         |
| Crystal size/mm <sup>3</sup>                | 0.24 × 0.18 × 0.12                                            |
| Radiation                                   | Mo Kα (λ = 0.71073)                                           |
| 2θ range for data collection/°              | 4.66 to 50                                                    |
| Index ranges                                | -12 ≤ h ≤ 10, -14 ≤ k ≤ 14, -27 ≤ l ≤ 23                      |
| Reflections collected                       | 15873                                                         |
| Independent reflections                     | 5295 [R <sub>int</sub> = 0.0469, R <sub>sigma</sub> = 0.0690] |
| Data/restraints/parameters                  | 5295/0/417                                                    |
| Goodness-of-fit on F <sup>2</sup>           | 1.058                                                         |
| Final R indexes [I ≥ 2σ (I)]                | R <sub>1</sub> = 0.0444, wR <sub>2</sub> = 0.0986             |
| Final R indexes [all data]                  | R <sub>1</sub> = 0.0572, wR <sub>2</sub> = 0.1064             |
| Largest diff. peak/hole / e Å <sup>-3</sup> | 0.35/-0.39                                                    |

**Table S6. Crystal data and structure refinement for CCDC 1992303 (8c)**

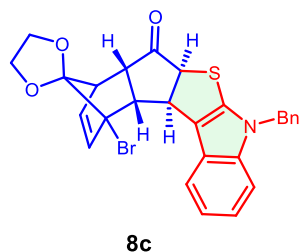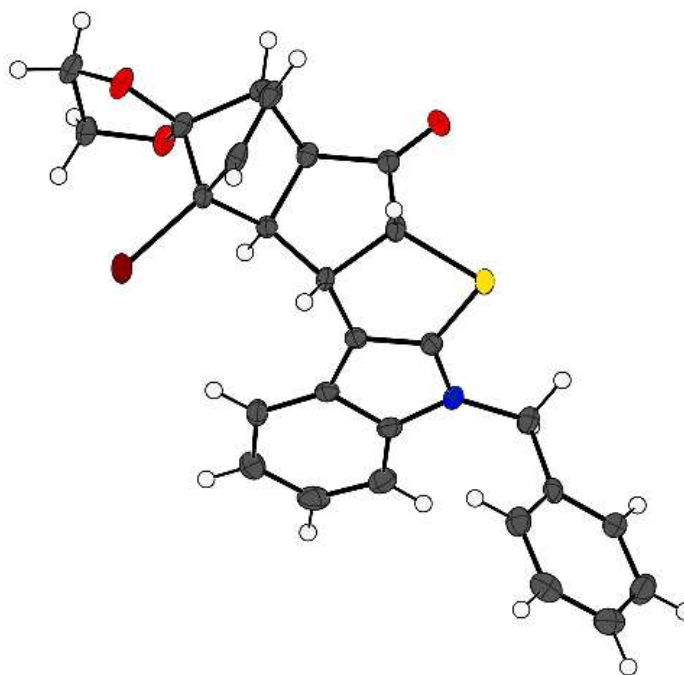

|                                             |                                                               |
|---------------------------------------------|---------------------------------------------------------------|
| Identification code                         | INN-SOHAN-II-350_Mo                                           |
| Empirical formula                           | C <sub>27</sub> H <sub>22</sub> BrNO <sub>3</sub> S           |
| Formula weight                              | 520.42                                                        |
| Temperature/K                               | 150                                                           |
| Crystal system                              | monoclinic                                                    |
| Space group                                 | P2 <sub>1</sub> /c                                            |
| a/Å                                         | 10.4378(5)                                                    |
| b/Å                                         | 10.0604(4)                                                    |
| c/Å                                         | 21.4824(10)                                                   |
| α/°                                         | 90                                                            |
| β/°                                         | 101.308(5)                                                    |
| γ/°                                         | 90                                                            |
| Volume/Å <sup>3</sup>                       | 2212.04(18)                                                   |
| Z                                           | 4                                                             |
| ρ <sub>calc</sub> /cm <sup>3</sup>          | 1.563                                                         |
| μ/mm <sup>-1</sup>                          | 1.984                                                         |
| F(000)                                      | 1064.0                                                        |
| Crystal size/mm <sup>3</sup>                | 0.123 × 0.113 × 0.078                                         |
| Radiation                                   | MoKα (λ = 0.71073)                                            |
| 2θ range for data collection/°              | 4.976 to 49.996                                               |
| Index ranges                                | -11 ≤ h ≤ 12, -11 ≤ k ≤ 11, -25 ≤ l ≤ 24                      |
| Reflections collected                       | 11757                                                         |
| Independent reflections                     | 3886 [R <sub>int</sub> = 0.0414, R <sub>sigma</sub> = 0.0477] |
| Data/restraints/parameters                  | 3886/0/298                                                    |
| Goodness-of-fit on F <sup>2</sup>           | 1.024                                                         |
| Final R indexes [I >= 2σ (I)]               | R <sub>1</sub> = 0.0365, wR <sub>2</sub> = 0.0745             |
| Final R indexes [all data]                  | R <sub>1</sub> = 0.0482, wR <sub>2</sub> = 0.0812             |
| Largest diff. peak/hole / e Å <sup>-3</sup> | 0.36/-0.40                                                    |

**Table S7. Cartesian coordinates for the optimized geometries at B3LYP/6-31G(d) (solvent model, MeCN) level of theory (All energies are reported in Hartrees)**

|                           |             |             |             |                         |             |             |             |
|---------------------------|-------------|-------------|-------------|-------------------------|-------------|-------------|-------------|
| <b>1</b>                  |             |             |             | <b>TS-(1+5)</b>         |             |             |             |
| <b>E = -3033.405557</b>   |             |             |             | <b>E = -3471.990935</b> |             |             |             |
| <b>G = -3033.276282</b>   |             |             |             | <b>G = -3471.751295</b> |             |             |             |
| C                         | 1.19125000  | -0.83919900 | -0.78604500 | C                       | 1.79119800  | -0.93961800 | -0.98173800 |
| C                         | 2.25217000  | -1.26007200 | 0.30693800  | C                       | 2.19608500  | -2.09567400 | 0.00765000  |
| C                         | 2.22721500  | 0.99680000  | 0.46726500  | C                       | 3.73452100  | -0.50464800 | 0.47076200  |
| C                         | 1.17681100  | 0.71589400  | -0.67270600 | C                       | 2.88453500  | 0.14000700  | -0.67627100 |
| H                         | 1.49114500  | -1.20629600 | -1.77397900 | H                       | 1.83946300  | -1.30327400 | -2.01484000 |
| H                         | 1.44641400  | 1.23272300  | -1.59906700 | H                       | 3.51524700  | 0.35192800  | -1.54844600 |
| C                         | 1.97579700  | -0.20798400 | 1.40783300  | C                       | 2.63889800  | -1.27690000 | 1.24665000  |
| H                         | 2.70097000  | -0.25830200 | 2.22520400  | H                       | 3.05082800  | -1.90740900 | 2.04222500  |
| H                         | 0.96340400  | -0.25037600 | 1.82389400  | H                       | 1.85370300  | -0.63357000 | 1.65538400  |
| C                         | 3.58677200  | -0.74659900 | -0.22649300 | C                       | 3.55021400  | -2.60434800 | -0.48102500 |
| H                         | 4.34714600  | -1.36906000 | -0.68819800 | H                       | 3.69643900  | -3.52017000 | -1.04696900 |
| C                         | 3.57068100  | 0.59331500  | -0.13341200 | C                       | 4.46732100  | -1.66490400 | -0.19557000 |
| H                         | 4.31353700  | 1.29240400  | -0.50538800 | H                       | 5.51498600  | -1.65515000 | -0.48364800 |
| H                         | 2.21111000  | -2.31463800 | 0.58769300  | H                       | 1.43836300  | -2.86886400 | 0.14476300  |
| H                         | 2.15962400  | 2.00007400  | 0.89212300  | H                       | 4.34778400  | 0.20541100  | 1.03039500  |
| C                         | -0.26110500 | 1.07931100  | -0.31571200 | C                       | 2.11938200  | 1.42434100  | -0.34947600 |
| C                         | -0.22714500 | -1.24835000 | -0.49585100 | C                       | 0.44818700  | -0.20361100 | -0.81437600 |
| H                         | -0.54818200 | -2.28566300 | -0.49147900 | C                       | 0.74622400  | 1.13958500  | -0.55501400 |
| C                         | -1.02088400 | -0.19132400 | -0.24941300 | O                       | 2.67420400  | 2.50839500  | -0.05480300 |
| O                         | -0.69742400 | 2.20602700  | -0.12461900 | Br                      | -0.57863700 | 2.51671200  | -0.54379900 |
| Br                        | -2.86671800 | -0.22399500 | 0.13462100  | C                       | -4.74866200 | -1.25103000 | -0.80265100 |
| <b>5</b>                  |             |             |             | C                       | -4.35018000 | -0.36264100 | 0.21162200  |
| <b>E = -438.600176</b>    |             |             |             | C                       | -3.03675200 | -0.43718300 | 0.66357000  |
| <b>G = -438.511992</b>    |             |             |             | C                       | -2.10094200 | -1.37296400 | 0.13732900  |
| C                         | 2.52732100  | -0.74926600 | 0.00004600  | C                       | -2.52135100 | -2.24388100 | -0.87524800 |
| C                         | 1.29202600  | -1.42303500 | 0.00007300  | C                       | -3.84690800 | -2.18251100 | -1.33605500 |
| C                         | 0.12520800  | -0.66424600 | 0.00000300  | H                       | -5.77004500 | -1.21237300 | -1.17339500 |
| C                         | 0.13780500  | 0.77380600  | -0.00004300 | H                       | -5.04974600 | 0.35739900  | 0.62967000  |
| C                         | 1.39186800  | 1.41825900  | -0.00003000 | H                       | -1.82985300 | -2.96922100 | -1.29964200 |
| C                         | 2.56856900  | 0.65626600  | -0.00000400 | H                       | -4.17537100 | -2.86267000 | -2.11846200 |
| H                         | 3.45203600  | -1.32165600 | 0.00008100  | C                       | -0.81606200 | -1.12425800 | 0.77104800  |
| H                         | 1.25132300  | -2.51081400 | 0.00010600  | C                       | -1.05398900 | -0.10789000 | 1.78937400  |
| H                         | 1.44833200  | 2.50584200  | -0.00000900 | N                       | -2.39016400 | 0.29124800  | 1.65659700  |
| H                         | 3.53196100  | 1.16308900  | 0.00000900  | H                       | -2.77201100 | 1.09279500  | 2.14082500  |
| C                         | -1.22282200 | 1.21182900  | 0.00008100  | O                       | -0.27524200 | 0.39239400  | 2.62814300  |
| H                         | -1.58010900 | 2.23494300  | 0.00026600  | H                       | -0.37403000 | -0.48524400 | -1.46301400 |
| C                         | -2.06510400 | 0.07472100  | -0.00019900 | H                       | -0.10431200 | -1.91079000 | 0.97174000  |
| N                         | -1.20368000 | -1.05178100 | -0.00005700 | <b>TS-XVIIa</b>         |             |             |             |
| H                         | -1.54522200 | -2.00308300 | 0.00017000  | <b>E = -3471.994710</b> |             |             |             |
| O                         | -3.33272400 | -0.06198300 | 0.00002700  | <b>G = -3471.750818</b> |             |             |             |
| <b>Intermediate (1+5)</b> |             |             |             | C                       | -0.96224900 | 1.07499100  | -0.94490800 |
| <b>E = -3472.024599</b>   |             |             |             | C                       | -0.06813800 | 2.36257400  | -1.02449000 |
| <b>G = -3471.782602</b>   |             |             |             | C                       | -1.29944300 | 2.76624800  | 0.83405700  |
| C                         | -1.06017400 | 1.26371600  | -0.75578600 | C                       | -1.76113500 | 1.34763300  | 0.38121100  |
| C                         | -1.07235200 | 2.35927800  | 0.37236100  | H                       | -1.63469800 | 1.06000700  | -1.80505600 |
| C                         | -3.25571900 | 1.79223400  | 0.23215900  | H                       | -2.84474900 | 1.31223400  | 0.23138000  |
| C                         | -2.56172800 | 0.83936200  | -0.82517700 | C                       | 0.19632100  | 2.67386100  | 0.47687600  |
| H                         | -0.71461700 | 1.71651500  | -1.68895200 | H                       | 0.73592400  | 3.61509400  | 0.62536600  |
| H                         | -3.03428500 | 0.94096700  | -1.80759400 | H                       | 0.70534500  | 1.87374900  | 1.02234200  |
| C                         | -2.16994600 | 1.83912900  | 1.33329900  | C                       | -1.04418300 | 3.49480000  | -1.34676100 |
| H                         | -2.41126900 | 2.56039700  | 2.12070800  | H                       | -1.17316900 | 3.93092000  | -2.33326600 |
| H                         | -1.93766700 | 0.87598600  | 1.79519400  | C                       | -1.78095600 | 3.72788200  | -0.24826900 |
| C                         | -1.81639900 | 3.53823900  | -0.24809500 | H                       | -2.63102700 | 4.39704400  | -0.15160600 |
| H                         | -1.34124900 | 4.43040900  | -0.64638600 | H                       | 0.78597800  | 2.28175300  | -1.69840200 |
| C                         | -3.11386800 | 3.19772400  | -0.34038200 | H                       | -1.55876800 | 3.01481000  | 1.86536000  |
| H                         | -3.91289600 | 3.75075600  | -0.82544600 | C                       | -1.41289400 | 0.17775300  | 1.29181000  |
| H                         | -0.08909100 | 2.56967300  | 0.79613500  | C                       | -0.36755900 | -0.38228700 | -0.84876200 |
| H                         | -4.26227400 | 1.47544500  | 0.51431700  | C                       | -0.95515500 | -0.93353400 | 0.41313700  |
| C                         | -2.61044600 | -0.62518500 | -0.41900400 | O                       | -1.54467700 | 0.12921300  | 2.51115700  |
| C                         | -0.22744300 | -0.05802000 | -0.52503900 | Br                      | -3.27673500 | -1.67226600 | -0.11312700 |
| C                         | -1.23802700 | -1.04024300 | 0.08802200  | C                       | 5.11921700  | 0.24805200  | 0.41750400  |
| O                         | -3.59775800 | -1.33904100 | -0.48961900 | C                       | 4.61514000  | -1.05753900 | 0.38193300  |
| C                         | 5.09935300  | 0.78340100  | -0.83258600 | C                       | 3.26842000  | -1.23740900 | 0.08559600  |
| C                         | 4.67833600  | 0.49049100  | 0.47755600  | C                       | 2.35185200  | -0.15979800 | -0.15938500 |
| C                         | 3.32333400  | 0.26655800  | 0.70079100  | C                       | 2.91567200  | 1.13396400  | -0.15434100 |
| C                         | 2.34759000  | 0.32682000  | -0.35094200 | C                       | 4.27124200  | 1.32715600  | 0.13571700  |
|                           |             |             |             | H                       | 6.16839800  | 0.41795900  | 0.64456300  |
|                           |             |             |             | H                       | 5.25859400  | -1.91498400 | 0.56362900  |
|                           |             |             |             | H                       | 2.32563200  | 2.00401800  | -0.39251400 |

|    |             |             |             |
|----|-------------|-------------|-------------|
| C  | 2.79957400  | 0.62621900  | -1.65227700 |
| C  | 4.16485100  | 0.84843200  | -1.88082400 |
| H  | 6.15372600  | 0.96102400  | -1.03103100 |
| H  | 5.39561800  | 0.43613800  | 1.29439600  |
| H  | 2.09465800  | 0.68903400  | -2.47977600 |
| H  | 4.50637700  | 1.07796200  | -2.88852700 |
| C  | 1.06665500  | 0.04198900  | 0.22258200  |
| C  | 1.25467300  | -0.19429200 | 1.60877600  |
| N  | 2.63849700  | -0.04435600 | 1.86136700  |
| H  | 3.04560100  | -0.17224200 | 2.77769900  |
| O  | 0.43911000  | -0.49615600 | 2.54307600  |
| H  | -0.00979200 | -0.42235800 | -1.54015900 |
| H  | -1.19800900 | -0.99285500 | 1.18156100  |
| Br | -0.83242100 | -2.93371100 | -0.29319900 |

**TS-XVIa**  
**E = -3471.999704**  
**G = -3471.756754**

|    |             |             |             |
|----|-------------|-------------|-------------|
| C  | -0.83156100 | 0.86484000  | -0.91735400 |
| C  | 0.03949100  | 2.15936600  | -0.74510700 |
| C  | -1.74106100 | 2.60616700  | 0.57526200  |
| C  | -2.05409800 | 1.17056600  | 0.01352500  |
| H  | -1.13997300 | 0.75863200  | -1.96024100 |
| H  | -3.01441900 | 1.16282100  | -0.51024700 |
| C  | -0.20605300 | 2.51629000  | 0.74347700  |
| H  | 0.24228400  | 3.47572000  | 1.02248500  |
| H  | 0.11006600  | 1.74338200  | 1.44783200  |
| C  | -0.76352800 | 3.27283800  | -1.41373400 |
| H  | -0.55584100 | 3.68001600  | -2.39942900 |
| C  | -1.82436200 | 3.53619200  | -0.63119800 |
| H  | -2.65747400 | 4.19944700  | -0.84601600 |
| H  | 1.07553900  | 2.04730400  | -1.07010100 |
| H  | -2.33665400 | 2.87963400  | 1.44907700  |
| C  | -2.10233000 | 0.05816200  | 1.05685800  |
| C  | -0.19685700 | -0.51031200 | -0.44846300 |
| C  | -1.10972100 | -1.00103800 | 0.66159500  |
| O  | -2.79899000 | 0.03901500  | 2.06027600  |
| Br | -2.93485500 | -2.04603100 | -0.78674900 |
| C  | 5.35070700  | -0.45377900 | -0.64329700 |
| C  | 4.78941900  | -0.46613200 | 0.64322800  |
| C  | 3.40271900  | -0.49067000 | 0.75488400  |
| C  | 2.53733600  | -0.49699700 | -0.39495700 |
| C  | 3.13121400  | -0.47660200 | -1.67159500 |
| C  | 4.52564800  | -0.45706200 | -1.78313700 |
| H  | 6.43181500  | -0.43664100 | -0.75584300 |
| H  | 5.42195200  | -0.45869500 | 1.52831000  |
| H  | 2.51140300  | -0.47490300 | -2.56588800 |
| H  | 4.98104800  | -0.44332000 | -2.77115500 |
| C  | 1.20043500  | -0.51519800 | 0.11019700  |
| C  | 1.26726100  | -0.52601900 | 1.49356900  |
| N  | 2.59609800  | -0.49551000 | 1.89258600  |
| H  | 2.91866000  | -0.55244600 | 2.84872600  |
| O  | 0.22289700  | -0.54635200 | 2.26679200  |
| H  | -0.24974500 | -1.21137500 | -1.28575000 |
| H  | -1.07062200 | -1.97490200 | 1.11730200  |

**9**  
**E = -3472.011501**  
**G = -3471.764084**

|   |            |             |             |
|---|------------|-------------|-------------|
| C | 1.71853800 | 0.21210300  | -1.03500300 |
| C | 2.16772000 | -1.29417000 | -1.15865500 |
| C | 3.87349900 | -0.36807800 | 0.03151300  |
| C | 2.86843500 | 0.83671500  | -0.15390100 |
| H | 1.66921500 | 0.66795200  | -2.02568200 |
| H | 3.35549100 | 1.70539200  | -0.60459000 |
| C | 2.85396800 | -1.53350300 | 0.21911900  |
| H | 3.34321100 | -2.50968600 | 0.27326100  |
| H | 2.17908800 | -1.38487000 | 1.06591500  |
| C | 3.40455100 | -1.24489200 | -2.06796900 |
| H | 3.40460000 | -1.51260400 | -3.11675600 |
| C | 4.40744400 | -0.69208300 | -1.36610700 |
| H | 5.39096300 | -0.41871900 | -1.72603900 |
| H | 1.37138100 | -1.97775700 | -1.44703300 |
| H | 4.59530700 | -0.19426800 | 0.82738300  |
| C | 2.35554800 | 1.15927000  | 1.23599600  |
| C | 0.38093200 | 0.47441200  | -0.26057800 |
| C | 0.83969000 | 1.00937700  | 1.10249000  |

|   |             |             |             |
|---|-------------|-------------|-------------|
| H | 4.66813500  | 2.33945700  | 0.13319900  |
| C | 1.05426500  | -0.76335400 | -0.44682300 |
| C | 1.28174900  | -2.21407000 | -0.45670200 |
| N | 2.59257700  | -2.43576800 | -0.06289600 |
| H | 3.01613000  | -3.35420600 | -0.05986400 |
| O | 0.49315700  | -3.13618300 | -0.76348800 |
| H | -0.65901400 | -0.94446100 | -1.74243400 |
| H | -0.74585500 | -1.91948000 | 0.79127800  |

**6**  
**E = -3472.030174**  
**G = -3471.787116**

|    |             |             |             |
|----|-------------|-------------|-------------|
| C  | 0.93764300  | 0.91403200  | 1.28580500  |
| C  | 0.24998900  | 2.27200300  | 1.67967800  |
| C  | 0.86837600  | 2.60463300  | -0.49409100 |
| C  | 1.37468100  | 1.15042400  | -0.19367000 |
| H  | 1.81103900  | 0.74682100  | 1.92418200  |
| H  | 2.45994200  | 1.06087300  | -0.30766200 |
| C  | -0.44661300 | 2.66542400  | 0.34798300  |
| H  | -0.85482800 | 3.67921100  | 0.38460900  |
| H  | -1.20978600 | 1.95870100  | 0.04100200  |
| C  | 1.40747000  | 3.29231500  | 1.66978200  |
| H  | 1.88540700  | 3.68554100  | 2.55732100  |
| C  | 1.76808900  | 3.49050700  | 0.39273400  |
| H  | 2.60119600  | 4.07480600  | 0.02477900  |
| H  | -0.36339500 | 2.23604200  | 2.57872900  |
| H  | 0.81006500  | 2.85871500  | -1.55138100 |
| C  | 0.80568600  | -0.01916300 | -1.00851800 |
| C  | 0.18585800  | -0.41872700 | 1.28999800  |
| C  | 0.34825300  | -1.11085000 | -0.03863000 |
| O  | 0.70405600  | -0.05576900 | -2.23701100 |
| Br | 3.84981900  | -1.47956300 | -0.55599900 |
| C  | -4.77691800 | 0.35427600  | -1.29240900 |
| C  | -4.67820500 | -0.59589200 | -0.26821500 |
| C  | -3.41427700 | -0.91762200 | 0.20906500  |
| C  | -2.24273100 | -0.27998100 | -0.27332000 |
| C  | -2.35587000 | 0.59422300  | -1.35264000 |
| C  | -3.62760700 | 0.92353400  | -1.84599000 |
| H  | -5.75379500 | 0.62240700  | -1.67701600 |
| H  | -5.56118200 | -1.08561300 | 0.12286300  |
| H  | -1.47551900 | 0.99198400  | -1.83617000 |
| H  | -3.71292900 | 1.61581700  | -2.67483300 |
| C  | -1.08344800 | -0.88930400 | 0.44935800  |
| C  | -1.68649800 | -2.04161200 | 1.25006500  |
| N  | -3.06123700 | -1.91979800 | 1.12444800  |
| H  | -3.71723600 | -2.54402000 | 1.58182200  |
| O  | -1.08062100 | -2.87725100 | 1.93194100  |
| H  | 0.26133100  | -1.02336000 | 2.18571300  |
| H  | 0.71394300  | -2.11982200 | -0.16647400 |

**TS-(1+7)**  
**E = -3794.950949**

|    |             |             |             |
|----|-------------|-------------|-------------|
| C  | 1.61461300  | -1.18373600 | -0.87791300 |
| C  | 1.94103400  | -2.23039200 | 0.25196700  |
| C  | 3.68422500  | -0.79797800 | 0.40910600  |
| C  | 2.84253600  | -0.21565000 | -0.77569200 |
| H  | 1.56786100  | -1.69286100 | -1.84687200 |
| H  | 3.43742700  | -0.20673500 | -1.69763600 |
| C  | 2.55789100  | -1.31203000 | 1.33870900  |
| H  | 2.93944400  | -1.87382800 | 2.19817100  |
| H  | 1.88780500  | -0.51883700 | 1.68661700  |
| C  | 3.19235600  | -2.96841400 | -0.21881500 |
| H  | 3.19197600  | -3.96506900 | -0.65121600 |
| C  | 4.23038700  | -2.12188200 | -0.11577300 |
| H  | 5.25151500  | -2.28517700 | -0.44924700 |
| H  | 1.11115100  | -2.87991800 | 0.53653300  |
| H  | 4.41112900  | -0.10087800 | 0.83241800  |
| C  | 2.25799400  | 1.19053500  | -0.61345400 |
| C  | 0.36824900  | -0.26624300 | -0.78152200 |
| C  | 0.85783300  | 1.05973300  | -0.71656300 |
| O  | 2.96753500  | 2.22414300  | -0.52488800 |
| Br | -0.29166600 | 2.57262200  | -0.94451700 |
| C  | -4.65789900 | -1.61854600 | -0.93348800 |
| C  | -4.39388500 | -0.50312600 | -0.12639800 |
| C  | -3.11095200 | -0.38454200 | 0.40353200  |
| C  | -2.08674300 | -1.32861100 | 0.14884500  |
| C  | -2.37011600 | -2.42758600 | -0.66845800 |

|    |             |             |             |
|----|-------------|-------------|-------------|
| O  | 3.03664000  | 1.40119800  | 2.26504400  |
| Br | -2.27056900 | 3.58252300  | -0.67095600 |
| C  | -3.40018600 | -3.69665900 | -0.31629600 |
| C  | -3.07017000 | -3.15181100 | 0.92637500  |
| C  | -2.11255600 | -2.14200200 | 0.96729900  |
| C  | -1.45692000 | -1.66601900 | -0.22977600 |
| C  | -1.81309400 | -2.23645100 | -1.46287900 |
| C  | -2.77924200 | -3.24075800 | -1.49555100 |
| H  | -4.14658800 | -4.48028500 | -0.37211800 |
| H  | -3.55013900 | -3.50233100 | 1.83211000  |
| H  | -1.34074400 | -1.89501800 | -2.37693400 |
| H  | -3.05914400 | -3.68149800 | -2.44582600 |
| C  | -0.52244000 | -0.65864400 | 0.19696300  |
| C  | -0.67220300 | -0.55054600 | 1.55628900  |
| N  | -1.60680900 | -1.41811700 | 2.06131900  |
| H  | -1.87178500 | -1.53152400 | 3.03212700  |
| O  | 0.06401700  | 0.43474600  | 2.19790300  |
| H  | -0.19669200 | 1.24237500  | -0.78939900 |
| H  | 0.50705800  | 2.02626100  | 1.08825600  |

7

**E = -761.575288**

**G = -761.488671**

|   |             |             |             |
|---|-------------|-------------|-------------|
| C | -2.94623100 | -0.77448300 | -0.00057800 |
| C | -1.71243700 | -1.43516500 | -0.00053900 |
| C | -0.55364600 | -0.65411000 | -0.00023200 |
| C | -0.59201600 | 0.77625200  | -0.00005000 |
| C | -1.85031700 | 1.41161700  | -0.00009400 |
| C | -3.01107100 | 0.63469600  | -0.00038200 |
| H | -3.86483600 | -1.35616800 | -0.00072100 |
| H | -1.65834900 | -2.52151000 | -0.00056000 |
| H | -1.91734800 | 2.49785800  | -0.00008700 |
| H | -3.98300500 | 1.12328100  | -0.00052900 |
| C | 0.76909600  | 1.22779600  | -0.00033400 |
| H | 1.11146300  | 2.25494500  | -0.00078300 |
| C | 1.60146400  | 0.11075400  | 0.00035900  |
| N | 0.77878400  | -1.01744800 | 0.00025400  |
| H | 1.13639100  | -1.96273600 | 0.00089000  |
| S | 3.34344700  | -0.04360500 | 0.00069400  |

**Intermediate-(1+7)**

**E = -3794.997132**

**G = -3794.756340**

|   |             |             |             |
|---|-------------|-------------|-------------|
| C | -0.99212300 | 1.33790900  | -0.74257600 |
| C | -1.02718300 | 2.35886000  | 0.45501500  |
| C | -3.22050400 | 1.91445800  | 0.13674600  |
| C | -2.50139700 | 0.97923000  | -0.91632800 |
| H | -0.58071100 | 1.83896000  | -1.62243500 |
| H | -2.90585400 | 1.13545100  | -1.92180800 |
| C | -2.21186200 | 1.84179700  | 1.30751500  |
| H | -2.46976100 | 2.52743100  | 2.12098400  |
| H | -2.05884300 | 0.84220400  | 1.72397100  |
| C | -1.67010000 | 3.60831000  | -0.14107500 |
| H | -1.12636900 | 4.49589000  | -0.45227100 |
| C | -2.97190000 | 3.33924900  | -0.34243000 |
| H | -3.70719000 | 3.95904200  | -0.84714200 |
| H | -0.06660800 | 2.49543000  | 0.95434500  |
| H | -4.25786700 | 1.63506100  | 0.33342400  |
| C | -2.62978000 | -0.49716600 | -0.57143000 |
| C | -0.23038600 | -0.03079900 | -0.57441500 |
| C | -1.28987500 | -1.01123900 | -0.06062900 |
| O | -3.65173600 | -1.15434200 | -0.67925400 |
| C | 5.02779000  | 0.84000600  | -1.09268300 |
| C | 4.69839400  | 0.48732900  | 0.22066500  |
| C | 3.35515000  | 0.23176500  | 0.50910100  |
| C | 2.32749600  | 0.32187400  | -0.47639500 |
| C | 2.69011700  | 0.67907000  | -1.79060200 |
| C | 4.03168300  | 0.93303200  | -2.08654000 |
| H | 6.06459600  | 1.04471900  | -1.34826500 |
| H | 5.46302900  | 0.41230900  | 0.99057900  |
| H | 1.93745000  | 0.76189800  | -2.57196300 |
| H | 4.31362300  | 1.20870200  | -3.10030600 |
| C | 1.07867200  | -0.00582100 | 0.16458000  |
| C | 1.36235600  | -0.28965200 | 1.50605000  |
| N | 2.73924700  | -0.13453800 | 1.68579600  |
| H | 3.19531500  | -0.29396600 | 2.57344800  |
| H | -0.00785200 | -0.33797900 | -1.60583500 |

|   |             |             |             |
|---|-------------|-------------|-------------|
| C | -3.66049300 | -2.57024400 | -1.19903400 |
| H | -5.65026400 | -1.74516300 | -1.35849300 |
| H | -5.16332300 | 0.23598900  | 0.08034700  |
| H | -1.60371200 | -3.16744200 | -0.88776000 |
| H | -3.89108000 | -3.42775500 | -1.82614600 |
| C | -0.85880700 | -0.82957700 | 0.78056400  |
| C | -1.27071500 | 0.32206300  | 1.56588300  |
| N | -2.57675900 | 0.59360500  | 1.24220800  |
| H | -3.08796900 | 1.37809400  | 1.62617500  |
| H | -0.44198600 | -0.49208300 | -1.46937800 |
| H | -0.15444000 | -1.50604900 | 1.24082700  |
| S | -0.38282800 | 1.21093400  | 2.70740300  |

8

**E = -3795.018440**

**G = -3794.777815**

|    |             |             |             |
|----|-------------|-------------|-------------|
| C  | -1.28883200 | 0.76614200  | 0.51886600  |
| C  | -1.05436900 | 0.02665400  | 1.88811500  |
| C  | -3.25360900 | -0.34222200 | 1.51929200  |
| C  | -2.80069300 | 0.48877300  | 0.25260500  |
| H  | -1.08110000 | 1.83162600  | 0.63598300  |
| H  | -3.41615200 | 1.38804500  | 0.13968800  |
| C  | -1.98727700 | -1.20100200 | 1.74852300  |
| H  | -2.04477100 | -1.79520000 | 2.66613900  |
| H  | -1.73776400 | -1.85867600 | 0.90821200  |
| C  | -1.83772000 | 0.83338700  | 2.91802700  |
| H  | -1.39591900 | 1.53843600  | 3.61638200  |
| C  | -3.14592600 | 0.61798800  | 2.69638800  |
| H  | -3.98949200 | 1.10811900  | 3.17351900  |
| H  | -0.00534800 | -0.16116100 | 2.11893400  |
| H  | -4.20742000 | -0.85677700 | 1.38616900  |
| C  | -2.89073900 | -0.30613700 | -1.03757200 |
| C  | -0.48416100 | 0.26039700  | -0.73786500 |
| C  | -1.51397500 | -0.43448900 | -1.68714900 |
| O  | -3.91787600 | -0.76542100 | -1.51208000 |
| Br | 1.22239600  | 3.48964200  | -0.87808300 |
| C  | 4.33924400  | -1.60296600 | 1.27063500  |
| C  | 3.60789500  | -2.53316500 | 0.52979500  |
| C  | 2.38780700  | -2.11535900 | -0.00934800 |
| C  | 1.88584800  | -0.78678100 | 1.67588000  |
| C  | 2.65469200  | 0.13120400  | 0.90932200  |
| C  | 3.86626300  | -0.28576700 | 1.45697600  |
| H  | 5.29022200  | -1.89836900 | 1.70645200  |
| H  | 3.97159000  | -3.54684500 | 0.38201400  |
| H  | 2.30492600  | 1.15109600  | 1.04339700  |
| H  | 4.46319200  | 0.41658500  | 2.03379900  |
| C  | 0.61682300  | -0.73485300 | -0.50573900 |
| C  | 0.41907900  | -1.97625900 | -1.05332800 |
| N  | 1.46158200  | -2.82454000 | -0.76725700 |
| H  | 1.56216300  | -3.77991700 | -1.08066000 |
| H  | -0.09009900 | 1.15376900  | -1.23158500 |
| S  | -1.05403900 | -2.23733700 | -1.98078200 |
| H  | -1.55342100 | 0.03104500  | -2.67639700 |

**TS-XVIIIb**

**E = -3794.979966**

**G = -3794.738552**

|   |             |             |             |
|---|-------------|-------------|-------------|
| C | -0.80201000 | 0.89036500  | -0.95062700 |
| C | 0.01096100  | 2.21539600  | -0.73420600 |
| C | -1.87645400 | 2.61456200  | 0.44479000  |
| C | -2.10764000 | 1.16958000  | -0.13496200 |
| H | -1.01726800 | 0.75606500  | -2.01341900 |
| H | -3.01344600 | 1.15069900  | -0.74901600 |
| C | -0.35600600 | 2.57778700  | 0.72613800  |
| H | 0.03623800  | 3.55568500  | 1.02564300  |
| H | -0.06422100 | 1.82355700  | 1.46067900  |
| C | -0.77629400 | 3.29408700  | -1.47545500 |
| H | -0.50980300 | 3.69714000  | -2.44861500 |
| C | -1.89889300 | 3.53186500  | -0.77535400 |
| H | -2.73502200 | 4.16465100  | -1.05941500 |
| H | 1.07127500  | 2.13676200  | -0.98129700 |
| H | -2.54467900 | 2.87533000  | 1.26862700  |
| C | -2.25089500 | 0.03847900  | 0.88006600  |
| C | -0.17887300 | -0.46412900 | -0.40838000 |
| C | -1.21551200 | -1.00236100 | 0.56257000  |
| O | -3.09218700 | -0.02360100 | 1.76621200  |

|    |             |             |             |
|----|-------------|-------------|-------------|
| H  | -1.28752900 | -1.06717400 | 1.03512000  |
| Br | -0.95624600 | -2.87401600 | -0.61948800 |
| S  | 0.37769100  | -0.75751200 | 2.87664400  |

**10**  
**E = -3794.985075**  
**G = -3794.747430**

|    |             |             |             |
|----|-------------|-------------|-------------|
| C  | 0.99788400  | 0.53477700  | 1.24032500  |
| C  | 0.57015200  | 1.81918500  | 2.02819900  |
| C  | 1.06787700  | 2.61609500  | -0.03745100 |
| C  | 1.38945500  | 1.08307200  | -0.15766800 |
| H  | 1.86232500  | 0.07613100  | 1.73321300  |
| H  | 2.45671900  | 0.93483200  | -0.35995400 |
| C  | -0.14590500 | 2.63281100  | 0.93004000  |
| H  | -0.39572800 | 3.64795900  | 1.25496800  |
| H  | -1.04421500 | 2.14993300  | 0.55552500  |
| C  | 1.85384800  | 2.64634800  | 2.14952600  |
| H  | 2.45731400  | 2.72635700  | 3.04900300  |
| C  | 2.14541700  | 3.12410700  | 0.92795400  |
| H  | 3.03851400  | 3.66250500  | 0.62444600  |
| H  | 0.02428200  | 1.62939400  | 2.95542600  |
| H  | 0.97548200  | 3.14996400  | -0.98597800 |
| C  | 0.72129500  | 0.16491800  | -1.17978900 |
| C  | 0.07212000  | -0.66238200 | 0.98618800  |
| C  | 0.11553600  | -1.03415800 | -0.45935700 |
| O  | 0.74612400  | 0.30072400  | -2.39220900 |
| Br | 4.18274200  | -1.15638400 | -0.69185000 |
| C  | -4.75576600 | 1.33763200  | -1.12262500 |
| C  | -4.78770700 | 0.15464800  | -0.37683800 |
| C  | -3.56606300 | -0.41892500 | -0.03878600 |
| C  | -2.32009000 | 0.14923200  | -0.36349600 |
| C  | -2.31726900 | 1.29227500  | -1.16698000 |
| C  | -3.53415100 | 1.88530700  | -1.53185800 |
| H  | -5.68815500 | 1.81519000  | -1.41017300 |
| H  | -5.72646200 | -0.31453600 | -0.09697500 |
| H  | -1.39569300 | 1.72946900  | -1.53120700 |
| H  | -3.52255700 | 2.77968400  | -2.14815700 |
| C  | -1.26261600 | -0.78588800 | 0.15192900  |
| C  | -2.04199600 | -1.99898600 | 0.62666900  |
| N  | -3.34677800 | -1.65873200 | 0.57543700  |
| H  | -4.08382200 | -2.29923700 | 0.84733800  |
| H  | 0.11019300  | -1.44752900 | 1.73385100  |
| S  | -1.47102700 | -3.48579200 | 1.14477600  |
| H  | 0.31861000  | -2.02906500 | -0.84925400 |

**TS-XIXb**  
**E = -3794.953795**  
**G = -3794.712777**

|    |             |             |             |
|----|-------------|-------------|-------------|
| C  | -0.97221600 | 1.13676400  | -1.00635600 |
| C  | -0.13684900 | 2.45925600  | -1.16130300 |
| C  | -1.42755800 | 2.92952300  | 0.64098400  |
| C  | -1.78648400 | 1.45188400  | 0.30055600  |
| H  | -1.63807800 | 1.04549700  | -1.86637400 |
| H  | -2.86343500 | 1.32249700  | 0.16504300  |
| C  | 0.07628900  | 2.90219800  | 0.31591000  |
| H  | 0.55848900  | 3.88199300  | 0.39656200  |
| H  | 0.61551600  | 2.18224000  | 0.93780800  |
| C  | -1.16855200 | 3.50691100  | -1.58487800 |
| H  | -1.30021300 | 3.85995800  | -2.60359400 |
| C  | -1.94369500 | 3.77308300  | -0.52077600 |
| H  | -2.83303300 | 4.39569400  | -0.49004800 |
| H  | 0.73526900  | 2.37638500  | -1.81200000 |
| H  | -1.72122600 | 3.24191000  | 1.64529400  |
| C  | -1.33677000 | 0.38697500  | 1.29699700  |
| C  | -0.33732400 | -0.29431300 | -0.82888700 |
| C  | -0.81536600 | -0.75915700 | 0.49771300  |
| O  | -1.42221400 | 0.43631500  | 2.51910600  |
| Br | -3.34298000 | -1.57157900 | 0.16511400  |
| C  | 5.05406400  | 0.60847700  | 0.61028000  |
| C  | 4.62946700  | -0.72031500 | 0.56557600  |
| C  | 3.30612000  | -0.96894800 | 0.20643500  |
| C  | 2.34729400  | 0.04860100  | -0.07857100 |
| C  | 2.83623200  | 1.37162800  | -0.07496500 |
| C  | 4.16307400  | 1.63841100  | 0.27170300  |
| H  | 6.08040500  | 0.84039800  | 0.88139400  |
| H  | 5.30923700  | -1.54095900 | 0.77883500  |
| H  | 2.21614000  | 2.20288300  | -0.36464600 |

|    |             |             |             |
|----|-------------|-------------|-------------|
| Br | -2.74238800 | -2.09547200 | -1.03944000 |
| C  | 5.23147100  | -0.36606300 | -1.04437200 |
| C  | 4.83754700  | -0.38484400 | 0.29729800  |
| C  | 3.46896900  | -0.41714900 | 0.57380900  |
| C  | 2.47945100  | -0.41747700 | -0.45891900 |
| C  | 2.90726000  | -0.39469700 | -1.80066700 |
| C  | 4.27458600  | -0.37146000 | -2.08073400 |
| H  | 6.29026300  | -0.34381000 | -1.28984800 |
| H  | 5.57308900  | -0.37885200 | 1.09829900  |
| H  | 2.18179800  | -0.39174600 | -2.61134300 |
| H  | 4.60950600  | -0.35506100 | -3.11529900 |
| C  | 1.20066800  | -0.43375600 | 0.19397400  |
| C  | 1.43023500  | -0.45496600 | 1.55809200  |
| N  | 2.79820600  | -0.43838500 | 1.78555800  |
| H  | 3.22821500  | -0.46992700 | 2.69946100  |
| H  | -0.12725400 | -1.15359900 | -1.25634000 |
| S  | 0.19035200  | -0.51662500 | 2.77649500  |
| H  | -1.16212000 | -1.95318800 | 1.06139200  |

|   |             |             |             |  |
|---|-------------|-------------|-------------|--|
| H | 4.50845200  | 2.66895100  | 0.26669100  |  |
| C | 1.09502400  | -0.63833600 | -0.41932900 |  |
| C | 1.41676500  | -2.06141500 | -0.42438900 |  |
| N | 2.70568700  | -2.19816900 | 0.00903200  |  |
| H | 3.17511300  | -3.09320800 | 0.05682400  |  |
| H | -0.62775100 | -0.93485400 | -1.66627700 |  |
| S | 0.49331400  | -3.40192600 | -0.92910100 |  |
| H | -0.66281800 | -1.74399200 | 0.90483100  |  |
